# Supplementary material
Source: PubMed Central journal article supplement (PMC3539310)
Supplement: NIHMS427457-supplement-Suppl_mFig_1.pdf [file NIHMS427457-supplement-Suppl_mFig_1.pdf]

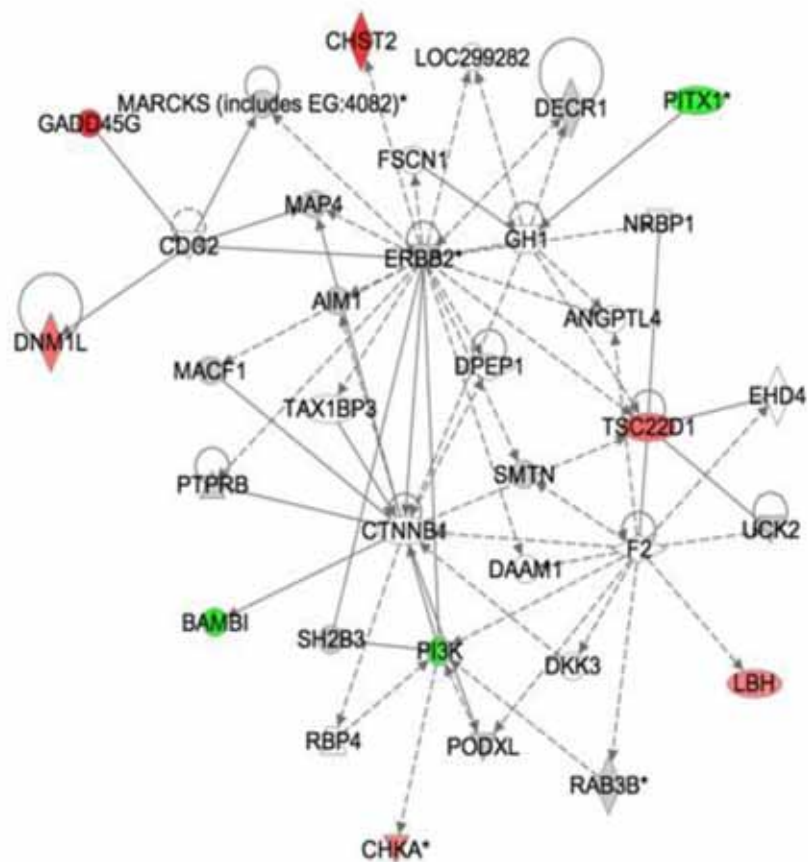

**Supplementary Figure 1** Significant biological networks associated with the androgen-responsive genes in R1 cells treated with DHT for 2h. Genes are represented as nodes, and the biological relationship between two nodes is represented as a line (solid line: direct interaction; dashed line: indirect interaction). Genes in green are user input molecules that are downregulated and whose absolute expression values are above the user defined cutoff. Genes in red are user input molecules that are upregulated and whose absolute expression values are above the user defined cutoff. The intensity of the node colour indicates the degree of up- or down-regulation. Genes in gray are user input molecules that are neither up- nor down-regulated, or are below the user defined cutoff. Genes without colour are molecules that are not user specified, but incorporated into the network through relationships with other molecules. Relevant canonical pathways (CP) are overlaid on top of the network.

### Network Shapes

- |                                                                                                                |                                                                                                                       |
|----------------------------------------------------------------------------------------------------------------|-----------------------------------------------------------------------------------------------------------------------|
|  Chemical or Drug           |  Ligand-dependent Nuclear Receptor |
|  Cytokine                   |  Peptidase                         |
|  Enzyme                     |  Phosphatase                       |
|  G-protein Coupled Receptor |  Transcription Regulator           |
|  Group or Complex           |  Translation Regulator             |
|  Growth Factor              |  Transmembrane Receptor            |
|  Ion Channel                |  Transporter                       |
|  Kinase                     |  Other                             |

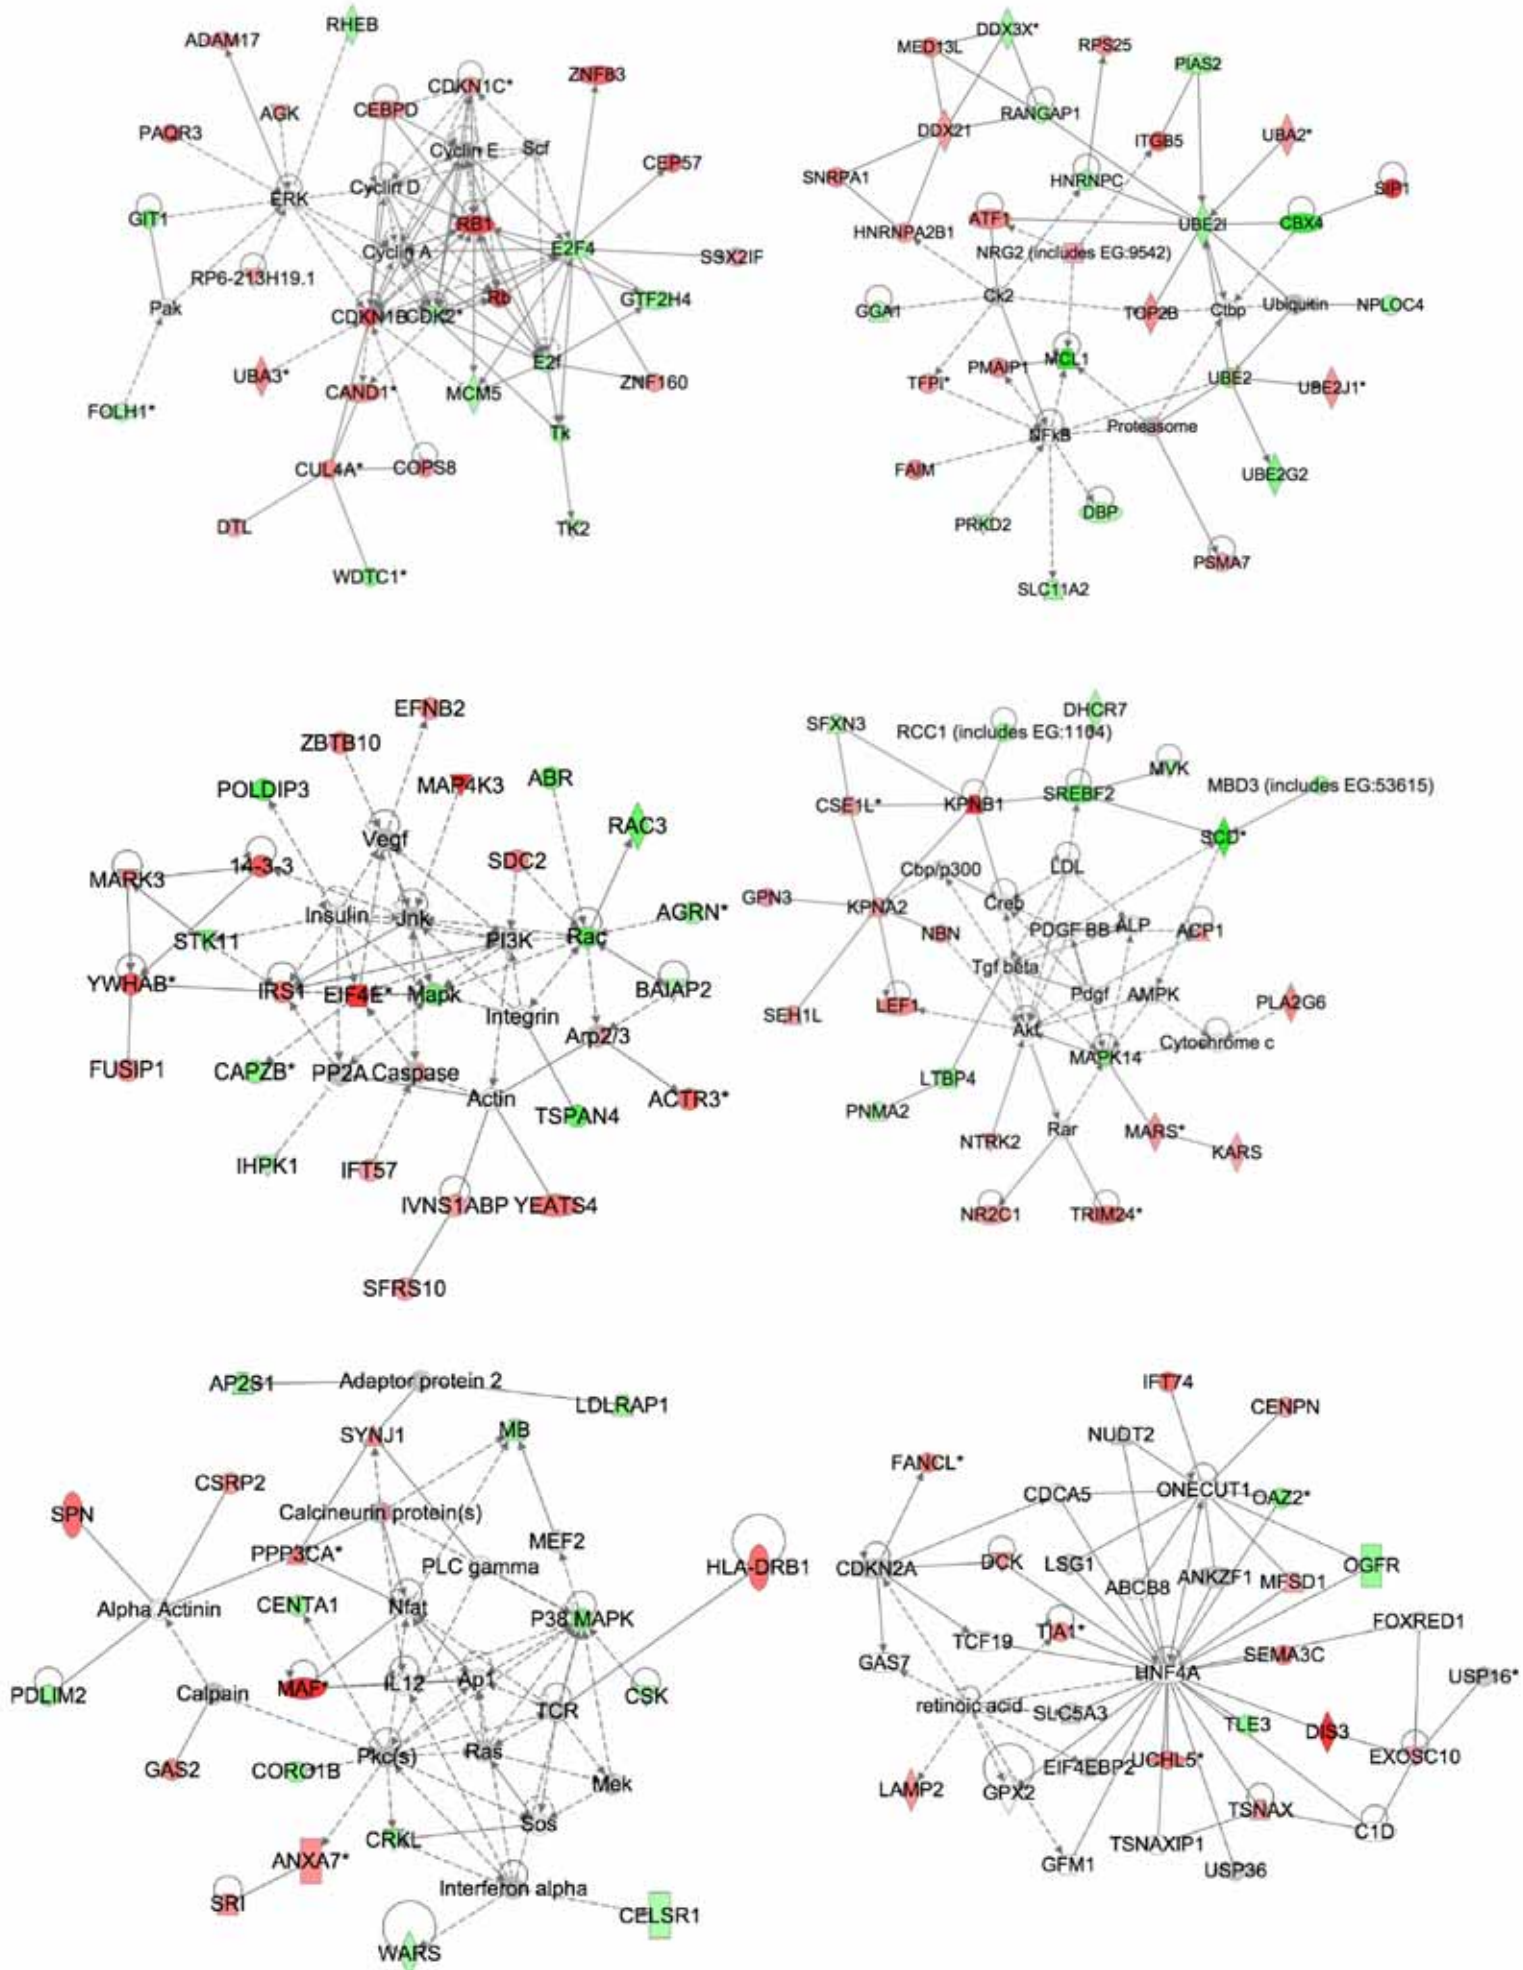

**Supplementary Figure 2** The most significant biological networks associated with androgen-responsive genes in Rv1 cells treated with DHT for 2h.

Supplementary Table 1

Gene Expression differences-R1 vs Rv1 2h 10 nM DHT  
higher in R1                      higher in Rv1

| Gene         | fold  | cha  | P value | Gene        | fold  | cha  | P value |
|--------------|-------|------|---------|-------------|-------|------|---------|
| IGFBP5       | 58.54 | 0.03 |         | TARP /// TR | 99.17 | 0.05 |         |
| SNAI2        | 40.52 | 0.05 |         | TARP /// TR | 62.78 | 0.04 |         |
| CX3CL1       | 30.87 | 0.04 |         | GPM6A       | 59.68 | 0.05 |         |
| SHOX2        | 24.83 | 0.03 |         | TARP /// TR | 59.16 | 0.01 |         |
| ASS1         | 24.3  | 0.03 |         | STEAP1      | 57.92 | 0.05 |         |
| NEFL         | 24.1  | 0.04 |         | NEFH        | 57.77 | 0.04 |         |
| CX3CL1       | 23.71 | 0.04 |         | TARP /// TR | 52.82 | 0.01 |         |
| JAG1         | 17.3  | 0.01 |         | GPM6A       | 40.33 | 0.03 |         |
| THRA         | 16.58 | 0.03 |         | EPHA3       | 38.8  | 0.04 |         |
| JAG1         | 15.66 | 0.00 |         | NMNAT2      | 32.7  | 0.05 |         |
| MAPKAPK2     | 15.54 | 0.02 |         | HPGD        | 32.22 | 0.04 |         |
| ANXA1        | 14.27 | 0.01 |         | HPGD        | 30.37 | 0.03 |         |
| BCL2         | 13.94 | 0.00 |         | ALB         | 29.55 | 0.02 |         |
| GALR2        | 12.5  | 0.04 |         | KRT19       | 28.66 | 0.04 |         |
| MSX2         | 12.07 | 0.00 |         | TOX3        | 24.97 | 0.04 |         |
| TLE1         | 12.04 | 0.02 |         | TFPI        | 24.28 | 0.03 |         |
| RHOBTB3      | 12.03 | 0.02 |         | LXN         | 22.37 | 0.05 |         |
| JAG1         | 11.95 | 0.03 |         | AKR1C3      | 21.75 | 0.01 |         |
| MET          | 11.67 | 0.03 |         | TNC         | 20.32 | 0.03 |         |
| LY6E         | 11.12 | 0.05 |         | IGFBP3      | 19.78 | 0.00 |         |
| MAPKAPK2     | 11.11 | 0.00 |         | NXF2        | 19.21 | 0.03 |         |
| GALNT12      | 10.53 | 0.04 |         | HPGD        | 19.19 | 0.02 |         |
| FHL1         | 10.42 | 0.04 |         | SCG3        | 19.08 | 0.01 |         |
| FER1L3       | 10.18 | 0.03 |         | CA12        | 18.85 | 0.02 |         |
| MAPKAPK2     | 9.56  | 0.02 |         | NXF2B       | 18.75 | 0.04 |         |
| TNFRSF12A    | 9.49  | 0.00 |         | HPGD        | 17.61 | 0.05 |         |
| RMND5A       | 9.36  | 0.00 |         | TACSTD1     | 16.34 | 0.03 |         |
| SHOX2        | 9.29  | 0.02 |         | BEX1        | 16.25 | 0.03 |         |
| NDRG1        | 9.09  | 0.03 |         | KBTBD11     | 16.07 | 0.01 |         |
| IGF2 /// INS | 8.89  | 0.01 |         | DECR1       | 15.65 | 0.04 |         |
| HLA-B        | 8.69  | 0.04 |         | CECR1       | 15.54 | 0.02 |         |
| ANXA2        | 8.51  | 0.01 |         | KLK2        | 14.54 | 0.03 |         |
| TRIM29       | 8.5   | 0.02 |         | ARMCX6      | 14.26 | 0.02 |         |
| CBX4         | 8.39  | 0.05 |         | GALNT3      | 14.23 | 0.02 |         |

Gene Expression differences R1 vs Rv1 No DHT  
higher in R1                      higher in Rv1

| Gene          | fold  | cha  | P value | Gene        | fold | ch   | P value |
|---------------|-------|------|---------|-------------|------|------|---------|
| IGFBP5        | 66.27 | 0.05 |         | TARP /// TR | 89.8 | 0.05 |         |
| SNAI2         | 42.47 | 0.03 |         | STEAP1      | 53.0 | 0.02 |         |
| MSX2          | 34.64 | 0.01 |         | TARP /// TR | 48.3 | 0.03 |         |
| SERPINB5      | 28.21 | 0.01 |         | NMNAT2      | 44.2 | 0.03 |         |
| SHOX2         | 27.29 | 0.01 |         | TARP /// TR | 42.2 | 0.01 |         |
| ASS1          | 23.22 | 0.02 |         | TARP /// TR | 40.5 | 0.01 |         |
| NEFL          | 19.96 | 0.05 |         | GJA1        | 40.0 | 0.05 |         |
| CX3CL1        | 19.81 | 0.00 |         | HPGD        | 34.6 | 0.03 |         |
| CX3CL1        | 18.73 | 0.00 |         | KRT19       | 28.2 | 0.05 |         |
| ANXA1         | 17.21 | 0.04 |         | HPGD        | 22.9 | 0.03 |         |
| BCL2          | 15.62 | 0.04 |         | NXF2        | 21.9 | 0.01 |         |
| MSX2          | 14.91 | 0.00 |         | LXN         | 19.5 | 0.05 |         |
| JAG1          | 14.21 | 0.02 |         | HPGD        | 17.3 | 0.02 |         |
| FHL1          | 11.2  | 0.02 |         | CA12        | 16.1 | 0.01 |         |
| NEFL          | 11.08 | 0.03 |         | TACSTD1     | 15.9 | 0.03 |         |
| LY6E          | 10.78 | 0.00 |         | BEX1        | 15.1 | 0.03 |         |
| FHL1          | 10.08 | 0.03 |         | ENO2        | 14.8 | 0.02 |         |
| JAG1          | 9.59  | 0.01 |         | KBTBD11     | 14.8 | 0.02 |         |
| ARL4C         | 9.01  | 0.04 |         | HBA1 /// HB | 14.7 | 0.03 |         |
| FER1L3        | 8.75  | 0.02 |         | IGFBP3      | 14.4 | 0.01 |         |
| CADM1         | 8.7   | 0.05 |         | HBA1        | 14.0 | 0.01 |         |
| ALDH2         | 7.68  | 0.00 |         | TFPI        | 14.0 | 0.05 |         |
| SDC4          | 7.58  | 0.05 |         | HBA1 /// HB | 13.9 | 0.02 |         |
| TRIM29        | 7.28  | 0.00 |         | CECR1       | 13.7 | 0.01 |         |
| NPTX2         | 7.06  | 0.02 |         | HBA1 /// HB | 13.4 | 0.02 |         |
| TLE1          | 6.96  | 0.00 |         | XAGE1 /// X | 13.3 | 0.00 |         |
| P4HA2         | 6.93  | 0.03 |         | KLK2        | 13.0 | 0.02 |         |
| IGF2 /// INS- | 6.88  | 0.01 |         | B3GALNT1    | 12.5 | 0.00 |         |
| MET           | 6.84  | 0.00 |         | NLGN1       | 12.1 | 0.04 |         |
| AKR1B10       | 6.79  | 0.00 |         | CCR10       | 11.8 | 0.03 |         |
| TNFRSF12A     | 6.52  | 0.01 |         | CLDN3       | 11.2 | 0.02 |         |
| HLA-A         | 6.47  | 0.00 |         | RAMP1       | 10.9 | 0.02 |         |
| TIMP3         | 6.36  | 0.01 |         | IGFBP3      | 10.6 | 0.03 |         |
| ANXA2         | 6.34  | 0.00 |         | ARMCX6      | 10.2 | 0.03 |         |

|         |      |      |             |       |      |          |      |      |            |     |      |
|---------|------|------|-------------|-------|------|----------|------|------|------------|-----|------|
| FHL1    | 8.38 | 0.00 | HBA1 /// HB | 14.22 | 0.05 | GALNT12  | 6.23 | 0.05 | TFPI       | 9.7 | 0.02 |
| ECE1    | 8.36 | 0.01 | MME         | 13.74 | 0.04 | IFITM1   | 6.17 | 0.01 | AKR1C2     | 9.3 | 0.00 |
| RNF103  | 8.33 | 0.01 | HRASLS3     | 13.44 | 0.01 | ASPH     | 6.11 | 0.00 | TOX3       | 8.4 | 0.02 |
| PTBP1   | 8.3  | 0.01 | AZGP1       | 13.43 | 0.05 | NDRG1    | 6.09 | 0.02 | UGT2B15 // | 8.3 | 0.04 |
| SGK1    | 8.21 | 0.00 | XAGE1 /// X | 13.35 | 0.04 | ECE1     | 6.04 | 0.02 | RGS2       | 8.3 | 0.03 |
| RMND5A  | 8.07 | 0.04 | CA12        | 12.49 | 0.00 | CRLF1    | 5.95 | 0.02 | HRASLS3    | 8.2 | 0.03 |
| CRLF1   | 7.95 | 0.02 | ENO2        | 11.95 | 0.02 | MET      | 5.95 | 0.01 | VPS13A     | 8.0 | 0.03 |
| COL6A2  | 7.93 | 0.00 | ARMCX3      | 11.72 | 0.03 | RNF103   | 5.95 | 0.03 | NEFH       | 8.0 | 0.02 |
| SDC4    | 7.75 | 0.03 | GAS2        | 11.61 | 0.00 | MAPKAPK2 | 5.93 | 0.01 | AKR1C1     | 8.0 | 0.01 |
| NEFL    | 7.63 | 0.04 | CLGN        | 11.37 | 0.02 | TIMP3    | 5.83 | 0.02 | NNT        | 7.7 | 0.05 |
| B4GALT1 | 7.58 | 0.02 | B3GALNT1    | 11.37 | 0.00 | COL6A2   | 5.77 | 0.00 | PON1       | 7.5 | 0.03 |
| HLA-F   | 7.55 | 0.05 | NMB         | 11.33 | 0.03 | SHOX2    | 5.75 | 0.02 | TMPRSS2    | 7.4 | 0.00 |
| MCL1    | 7.5  | 0.01 | SLC27A2     | 11.23 | 0.01 | GADD45A  | 5.59 | 0.01 | SCCPDH     | 7.3 | 0.01 |
| CLPTM1  | 7.3  | 0.03 | PRR16       | 11.19 | 0.02 | ANXA2    | 5.53 | 0.00 | tcag7.1314 | 7.3 | 0.01 |
| SDC1    | 7.26 | 0.03 | PON1        | 11.02 | 0.01 | GPNMB    | 5.39 | 0.02 | tcag7.1314 | 7.1 | 0.03 |
| SOX11   | 7.2  | 0.05 | NEFH        | 10.19 | 0.03 | HLA-A    | 5.37 | 0.01 | PRR16      | 7.0 | 0.01 |
| NKX3-2  | 7.07 | 0.03 | TFPI        | 10.18 | 0.00 | HIF1A    | 5.24 | 0.03 | AZGP1      | 6.9 | 0.05 |
| ARL4C   | 7.02 | 0.00 | SPINK1      | 9.82  | 0.02 | BMP7     | 5.16 | 0.00 | LPL        | 6.9 | 0.01 |
| HLA-F   | 7.02 | 0.04 | MYBPC1      | 9.8   | 0.01 | FXYD6    | 5.12 | 0.01 | TXNIP      | 6.9 | 0.00 |
| ALDH2   | 7.01 | 0.01 | HBA1 /// HB | 9.76  | 0.03 | CRYAB    | 5.11 | 0.02 | CA12       | 6.7 | 0.01 |
| MET     | 6.78 | 0.00 | VPS13A      | 9.37  | 0.00 | MAPKAPK2 | 5.11 | 0.05 | DDAH1      | 6.7 | 0.02 |
| HLA-A   | 6.75 | 0.01 | TFPI        | 9.03  | 0.04 | PITX1    | 5.11 | 0.01 | RAB17      | 6.7 | 0.01 |
| S100P   | 6.74 | 0.00 | GALNT7      | 8.95  | 0.04 | IDH2     | 5.08 | 0.02 | CA12       | 6.6 | 0.02 |
| RMND5A  | 6.71 | 0.02 | STK39       | 8.82  | 0.03 | GHR      | 5.07 | 0.02 | STK39      | 6.5 | 0.04 |
| SCGB2A1 | 6.51 | 0.01 | ZNF217      | 8.78  | 0.03 | KRT15    | 4.93 | 0.01 | GABRA1     | 6.3 | 0.04 |
| HLA-A   | 6.36 | 0.01 | CHGB        | 8.69  | 0.02 | S100P    | 4.91 | 0.00 | HLA-DQB1   | 6.3 | 0.01 |
| NPTX2   | 6.35 | 0.04 | TMEPAI      | 8.67  | 0.00 | MPZL2    | 4.81 | 0.00 | DPYSL3     | 6.2 | 0.01 |
| TIMP3   | 6.33 | 0.05 | CA12        | 8.65  | 0.02 | FER1L3   | 4.79 | 0.02 | CA12       | 6.1 | 0.04 |
| HLA-B   | 6.19 | 0.04 | CCR10       | 8.63  | 0.02 | S100A4   | 4.72 | 0.00 | POU4F2     | 6.1 | 0.01 |
| FER1L3  | 6.16 | 0.01 | CGA         | 8.55  | 0.01 | BAMBI    | 4.68 | 0.02 | KLK2       | 6.0 | 0.02 |
| GADD45A | 6.1  | 0.01 | ST6GALNA    | 8.46  | 0.01 | SDC1     | 4.63 | 0.01 | EHF        | 6.0 | 0.04 |
| ANXA2   | 6.1  | 0.00 | HIST2H2BE   | 8.26  | 0.02 | NOTCH2   | 4.62 | 0.01 | TRIM36     | 6.0 | 0.04 |
| HLA-B   | 6.07 | 0.01 | SMPDL3A     | 8.12  | 0.05 | SOX11    | 4.61 | 0.05 | GMPR       | 5.9 | 0.01 |
| FXYD3   | 6.04 | 0.01 | TSPYL4      | 8.11  | 0.01 | CERK     | 4.6  | 0.00 | TXNIP      | 5.9 | 0.00 |
| TMC6    | 5.99 | 0.02 | NNT         | 8.08  | 0.03 | HLA-B    | 4.54 | 0.03 | MME        | 5.9 | 0.01 |
| FXYD6   | 5.96 | 0.02 | TAOK3       | 7.91  | 0.00 | VIPR1    | 4.54 | 0.00 | VGF        | 5.8 | 0.02 |
| F2R     | 5.94 | 0.03 | MME         | 7.9   | 0.02 | DLX5     | 4.52 | 0.02 | CHGB       | 5.7 | 0.02 |

|          |      |      |          |      |      |         |      |      |           |     |      |
|----------|------|------|----------|------|------|---------|------|------|-----------|-----|------|
| ASCL2    | 5.91 | 0.01 | TXNIP    | 7.81 | 0.04 | DEPDC6  | 4.51 | 0.00 | HLA-DQB1  | 5.7 | 0.02 |
| S100A4   | 5.9  | 0.01 | RAMP1    | 7.75 | 0.01 | HLA-B   | 4.51 | 0.00 | CD302     | 5.6 | 0.05 |
| IDH2     | 5.89 | 0.00 | GATA2    | 7.56 | 0.01 | EPB41L3 | 4.43 | 0.04 | SLC27A2   | 5.4 | 0.02 |
| MET      | 5.85 | 0.02 | RLN2     | 7.28 | 0.02 | BHLHB2  | 4.42 | 0.02 | AKR1C1    | 5.4 | 0.02 |
| ARHGDI1  | 5.82 | 0.02 | GABRA1   | 6.91 | 0.03 | JUNB    | 4.4  | 0.03 | CLDN3     | 5.3 | 0.01 |
| PCDHGA10 | 5.81 | 0.00 | COLEC12  | 6.85 | 0.00 | DKK1    | 4.39 | 0.03 | CA8       | 5.3 | 0.04 |
| IFITM1   | 5.66 | 0.01 | BCOR     | 6.82 | 0.01 | SDC1    | 4.39 | 0.03 | TSPYL4    | 5.2 | 0.03 |
| HLA-G    | 5.62 | 0.01 | FAM129A  | 6.74 | 0.03 | HTR2C   | 4.31 | 0.04 | CELSR3    | 5.1 | 0.01 |
| NOTCH2   | 5.55 | 0.01 | SCCPDH   | 6.73 | 0.01 | SAT1    | 4.27 | 0.01 | CA12      | 5.1 | 0.01 |
| AKR1B10  | 5.54 | 0.04 | SLC27A2  | 6.64 | 0.02 | ANXA2   | 4.26 | 0.02 | SLC43A3   | 5.1 | 0.01 |
| P4HA2    | 5.51 | 0.01 | ENPP4    | 6.59 | 0.02 | RMND5A  | 4.18 | 0.05 | KLK3      | 5.0 | 0.02 |
| FLNA     | 5.48 | 0.04 | DDAH1    | 6.42 | 0.05 | ACSL1   | 4.16 | 0.01 | TMEPAI    | 5.0 | 0.02 |
| TSPAN4   | 5.37 | 0.02 | CA12     | 6.41 | 0.01 | HLA-F   | 4.16 | 0.05 | RHOF      | 4.9 | 0.03 |
| PRPS1    | 5.36 | 0.05 | UGT2B15  | 6.32 | 0.05 | TBPL1   | 4.14 | 0.02 | STAT6     | 4.9 | 0.01 |
| CRYAB    | 5.36 | 0.01 | GUCY1B3  | 6.24 | 0.03 | FHL1    | 4.12 | 0.02 | SMPDL3A   | 4.8 | 0.03 |
| ATP2B4   | 5.28 | 0.02 | SERPINB1 | 6.19 | 0.01 | MPZL2   | 4.11 | 0.05 | SERPINB1  | 4.8 | 0.01 |
| ASPH     | 5.21 | 0.02 | DNAJC6   | 6.15 | 0.05 | IFITM1  | 4.11 | 0.01 | IQSEC2    | 4.8 | 0.03 |
| BARX1    | 5.16 | 0.02 | PTPRB    | 6.09 | 0.01 | F2R     | 4.05 | 0.02 | VIM       | 4.8 | 0.02 |
| ADAM15   | 5.14 | 0.02 | DSC2     | 5.94 | 0.02 | CAPN2   | 3.99 | 0.04 | HOXB13    | 4.8 | 0.01 |
| PDE3A    | 5.13 | 0.02 | SCCPDH   | 5.92 | 0.02 | NID1    | 3.96 | 0.01 | DSC2      | 4.8 | 0.04 |
| NID1     | 5.11 | 0.05 | CD44     | 5.9  | 0.05 | KLF5    | 3.95 | 0.04 | KLK1      | 4.7 | 0.01 |
| PCDHGA1  | 5.11 | 0.01 | PRUNE2   | 5.82 | 0.00 | NID1    | 3.91 | 0.02 | SERPINB6  | 4.6 | 0.04 |
| MAGED4   | 5.06 | 0.01 | KLK2     | 5.7  | 0.02 | FXYD3   | 3.88 | 0.02 | HLA-DQB1  | 4.6 | 0.01 |
| SOCS2    | 4.98 | 0.02 | HLA-DQB1 | 5.64 | 0.04 | GAS6    | 3.88 | 0.01 | GAS2      | 4.6 | 0.05 |
| TSC22D3  | 4.97 | 0.00 | RHOF     | 5.64 | 0.01 | GSN     | 3.85 | 0.01 | INHBB     | 4.5 | 0.02 |
| FLNA     | 4.96 | 0.02 | CELSR3   | 5.53 | 0.01 | BTN3A2  | 3.8  | 0.01 | CGA       | 4.4 | 0.03 |
| BMP7     | 4.96 | 0.00 | FLJ10038 | 5.53 | 0.02 | SLPI    | 3.79 | 0.03 | MYBPC1    | 4.4 | 0.02 |
| ETS2     | 4.95 | 0.01 | RND3     | 5.49 | 0.01 | HLA-B   | 3.78 | 0.00 | PLA2G3    | 4.4 | 0.03 |
| TIMP3    | 4.92 | 0.03 | TMEM45A  | 5.49 | 0.05 | BCL3    | 3.74 | 0.02 | C10orf116 | 4.3 | 0.04 |
| AGRN     | 4.9  | 0.01 | RGS2     | 5.48 | 0.02 | KLF4    | 3.73 | 0.01 | VIL1      | 4.3 | 0.01 |
| PCDHGA1  | 4.89 | 0.01 | HLA-DQB1 | 5.44 | 0.01 | D4S234E | 3.72 | 0.02 | GULP1     | 4.2 | 0.01 |
| MICA     | 4.84 | 0.01 | NOTCH3   | 5.4  | 0.00 | SGK1    | 3.66 | 0.04 | C11orf75  | 4.2 | 0.04 |
| STC2     | 4.81 | 0.01 | CLDN3    | 5.39 | 0.01 | MET     | 3.63 | 0.05 | PTPRB     | 4.2 | 0.02 |
| SYMPK    | 4.79 | 0.02 | GMPR     | 5.39 | 0.01 | SYPL1   | 3.63 | 0.02 | RLN2      | 4.2 | 0.04 |
| SPDEF    | 4.73 | 0.02 | PLA2G3   | 5.38 | 0.01 | HLA-G   | 3.57 | 0.05 | ENSA      | 4.1 | 0.02 |
| D4S234E  | 4.71 | 0.05 | GULP1    | 5.37 | 0.05 | ZNF238  | 3.57 | 0.04 | RIMS3     | 4.1 | 0.02 |
| NOTCH2   | 4.7  | 0.02 | SERPINB1 | 5.21 | 0.03 | ACSL1   | 3.55 | 0.03 | LPPR4     | 4.1 | 0.01 |

|                 |      |      |                 |      |      |                |      |      |                 |     |      |
|-----------------|------|------|-----------------|------|------|----------------|------|------|-----------------|-----|------|
| <b>D4S234E</b>  | 4.7  | 0.05 | <b>SDC2</b>     | 5.16 | 0.02 | <b>ATP2B4</b>  | 3.53 | 0.01 | <b>GULP1</b>    | 4.1 | 0.04 |
| <b>GABARAPL</b> | 4.68 | 0.01 | <b>HMGB2</b>    | 5.13 | 0.02 | <b>NAB2</b>    | 3.53 | 0.01 | <b>FOLH1</b>    | 4.1 | 0.05 |
| <b>DAPK3</b>    | 4.66 | 0.02 | <b>HGF</b>      | 5.13 | 0.02 | <b>RGS10</b>   | 3.48 | 0.03 | <b>CD44</b>     | 4.1 | 0.04 |
| <b>SYPL1</b>    | 4.64 | 0.00 | <b>CA12</b>     | 5.12 | 0.01 | <b>PAM</b>     | 3.47 | 0.02 | <b>ACADL</b>    | 4.1 | 0.05 |
| <b>AMPH</b>     | 4.62 | 0.02 | <b>PGAM2</b>    | 5.1  | 0.02 | <b>TMC6</b>    | 3.46 | 0.01 | <b>HOXB6</b>    | 4.1 | 0.02 |
| <b>TMED9</b>    | 4.62 | 0.05 | <b>DPYSL3</b>   | 5.09 | 0.03 | <b>ALDOC</b>   | 3.45 | 0.00 | <b>FBXL15</b>   | 4.1 | 0.01 |
| <b>CERK</b>     | 4.62 | 0.01 | <b>PPP3CA</b>   | 5.07 | 0.01 | <b>ARSJ</b>    | 3.44 | 0.03 | <b>GLS2</b>     | 4.0 | 0.04 |
| <b>DBN1</b>     | 4.59 | 0.01 | <b>RAB17</b>    | 5.07 | 0.01 | <b>C7orf23</b> | 3.44 | 0.01 | <b>AKTIP</b>    | 4.0 | 0.00 |
| <b>ARHGAP1</b>  | 4.55 | 0.02 | <b>SLC43A3</b>  | 5.05 | 0.02 | <b>SLC16A3</b> | 3.44 | 0.04 | <b>FAM110B</b>  | 3.9 | 0.00 |
| <b>FLNA</b>     | 4.49 | 0.01 | <b>KLK3</b>     | 5.03 | 0.02 | <b>SPDEF</b>   | 3.39 | 0.02 | <b>XK</b>       | 3.9 | 0.01 |
| <b>DEPDC6</b>   | 4.49 | 0.03 | <b>RB1</b>      | 5.02 | 0.02 | <b>AGR2</b>    | 3.38 | 0.02 | <b>BAG2</b>     | 3.9 | 0.04 |
| <b>BMP1</b>     | 4.47 | 0.03 | <b>IRS1</b>     | 5    | 0.01 | <b>D4S234E</b> | 3.37 | 0.02 | <b>FAM129A</b>  | 3.9 | 0.02 |
| <b>PCDHGA1</b>  | 4.46 | 0.01 | <b>RIMS3</b>    | 5    | 0.03 | <b>SEMA3F</b>  | 3.37 | 0.00 | <b>MVP</b>      | 3.9 | 0.01 |
| <b>TP53I11</b>  | 4.42 | 0.03 | <b>IQSEC2</b>   | 4.98 | 0.02 | <b>TIMP2</b>   | 3.36 | 0.01 | <b>RND3</b>     | 3.9 | 0.05 |
| <b>KIF1A</b>    | 4.41 | 0.02 | <b>GLS2</b>     | 4.95 | 0.01 | <b>HBEGF</b>   | 3.35 | 0.01 | <b>MCCC2</b>    | 3.9 | 0.03 |
| <b>CHST2</b>    | 4.41 | 0.05 | <b>CXCR7</b>    | 4.9  | 0.02 | <b>SPDEF</b>   | 3.34 | 0.01 | <b>COLEC12</b>  | 3.9 | 0.03 |
| <b>HIF1A</b>    | 4.37 | 0.05 | <b>C11orf75</b> | 4.87 | 0.02 | <b>SNCA</b>    | 3.34 | 0.02 | <b>FOLH1</b>    | 3.9 | 0.03 |
| <b>B4GALT1</b>  | 4.36 | 0.05 | <b>APOLD1</b>   | 4.86 | 0.02 | <b>TLE1</b>    | 3.3  | 0.01 | <b>FLJ10038</b> | 3.8 | 0.03 |
| <b>FHL1</b>     | 4.32 | 0.00 | <b>HNMT</b>     | 4.85 | 0.04 | <b>PAM</b>     | 3.29 | 0.01 | <b>ZNF592</b>   | 3.8 | 0.01 |
| <b>TBPL1</b>    | 4.31 | 0.00 | <b>E2F8</b>     | 4.85 | 0.01 | <b>FLNA</b>    | 3.26 | 0.02 | <b>SCNN1A</b>   | 3.8 | 0.01 |
| <b>EPB41</b>    | 4.31 | 0.01 | <b>ACADL</b>    | 4.72 | 0.01 | <b>HLA-G</b>   | 3.26 | 0.02 | <b>PPAP2A</b>   | 3.8 | 0.02 |
| <b>DBN1</b>     | 4.29 | 0.03 | <b>EIF5B</b>    | 4.72 | 0.05 | <b>SPDEF</b>   | 3.26 | 0.01 | <b>RFPL1S</b>   | 3.7 | 0.02 |
| <b>HOMER3</b>   | 4.24 | 0.01 | <b>FAIM</b>     | 4.69 | 0.01 | <b>TIAM1</b>   | 3.25 | 0.04 | <b>GNG4</b>     | 3.7 | 0.03 |
| <b>ABR</b>      | 4.23 | 0.01 | <b>IFT57</b>    | 4.68 | 0.03 | <b>IGFBP5</b>  | 3.23 | 0.05 | <b>SLC39A8</b>  | 3.7 | 0.03 |
| <b>ALDOC</b>    | 4.2  | 0.01 | <b>MYNN</b>     | 4.67 | 0.02 | <b>IDH2</b>    | 3.23 | 0.01 | <b>GATA2</b>    | 3.7 | 0.01 |
| <b>GAS6</b>     | 4.2  | 0.01 | <b>RAPGEF5</b>  | 4.65 | 0.01 | <b>PXDN</b>    | 3.22 | 0.03 | <b>ZNF217</b>   | 3.6 | 0.01 |
| <b>GSN</b>      | 4.18 | 0.02 | <b>CDH10</b>    | 4.6  | 0.01 | <b>PAM</b>     | 3.21 | 0.01 | <b>FLJ10038</b> | 3.6 | 0.02 |
| <b>DDX11</b>    | 4.18 | 0.02 | <b>ZNF239</b>   | 4.57 | 0.01 | <b>ARFGEF1</b> | 3.2  | 0.04 | <b>AMACR</b>    | 3.6 | 0.01 |
| <b>TIAM1</b>    | 4.18 | 0.01 | <b>PTCH1</b>    | 4.56 | 0.05 | <b>KLF4</b>    | 3.2  | 0.04 | <b>SLC44A4</b>  | 3.5 | 0.01 |
| <b>PXDN</b>     | 4.17 | 0.01 | <b>PPP3CA</b>   | 4.55 | 0.01 | <b>PIK3R3</b>  | 3.2  | 0.00 | <b>FOLH1</b>    | 3.5 | 0.02 |
| <b>SPDEF</b>    | 4.15 | 0.03 | <b>BTG1</b>     | 4.49 | 0.03 | <b>PCDHGA1</b> | 3.2  | 0.01 | <b>AMACR</b>    | 3.5 | 0.02 |
| <b>JUP</b>      | 4.12 | 0.00 | <b>EIF4E</b>    | 4.42 | 0.02 | <b>TSPAN6</b>  | 3.2  | 0.03 | <b>ENSA</b>     | 3.5 | 0.03 |
| <b>MPZL2</b>    | 4.12 | 0.01 | <b>SMARCA1</b>  | 4.41 | 0.03 | <b>SYPL1</b>   | 3.19 | 0.00 | <b>MYNN</b>     | 3.4 | 0.02 |
| <b>JUND</b>     | 4.1  | 0.01 | <b>STAT6</b>    | 4.4  | 0.01 | <b>AMPH</b>    | 3.17 | 0.02 | <b>CD44</b>     | 3.4 | 0.02 |
| <b>POLDIP3</b>  | 4.1  | 0.01 | <b>ZBTB10</b>   | 4.39 | 0.01 | <b>ETS2</b>    | 3.16 | 0.01 | <b>ELL2</b>     | 3.4 | 0.02 |
| <b>SYPL1</b>    | 4.09 | 0.01 | <b>HBE1</b>     | 4.32 | 0.02 | <b>PCDHGA1</b> | 3.12 | 0.00 | <b>GDAP1</b>    | 3.4 | 0.01 |
| <b>SLC6A6</b>   | 4.07 | 0.05 | <b>MAGEF1</b>   | 4.29 | 0.04 | <b>D4S234E</b> | 3.11 | 0.05 | <b>C5orf30</b>  | 3.4 | 0.01 |

|                  |      |      |                     |      |      |                 |      |      |                  |     |      |
|------------------|------|------|---------------------|------|------|-----------------|------|------|------------------|-----|------|
| <b>LBH</b>       | 4.07 | 0.03 | <b>AKR1C1</b>       | 4.28 | 0.02 | <b>ENC1</b>     | 3.1  | 0.02 | <b>GADD45G</b>   | 3.4 | 0.02 |
| <b>DAPK3</b>     | 4.04 | 0.01 | <b>CDK10</b>        | 4.27 | 0.03 | <b>FXYD3</b>    | 3.1  | 0.04 | <b>HBE1</b>      | 3.4 | 0.04 |
| <b>SCD</b>       | 4.04 | 0.01 | <b>HLA-DQB1</b>     | 4.27 | 0.03 | <b>BMP7</b>     | 3.09 | 0.01 | <b>LOC441453</b> | 3.4 | 0.04 |
| <b>HLA-C</b>     | 4.02 | 0.01 | <b>DIS3</b>         | 4.26 | 0.04 | <b>LMO1</b>     | 3.09 | 0.03 | <b>SLC39A8</b>   | 3.4 | 0.01 |
| <b>KRT8</b>      | 4.02 | 0.03 | <b>EPS8</b>         | 4.24 | 0.02 | <b>FLNA</b>     | 3.08 | 0.00 | <b>FEV</b>       | 3.4 | 0.03 |
| <b>DFNA5</b>     | 4    | 0.04 | <b>TMEM47</b>       | 4.24 | 0.01 | <b>MYO1B</b>    | 3.08 | 0.03 | <b>SI</b>        | 3.4 | 0.05 |
| <b>EPN2</b>      | 3.95 | 0.01 | <b>C3orf14</b>      | 4.23 | 0.01 | <b>GADD45B</b>  | 3.06 | 0.01 | <b>THBS1</b>     | 3.4 | 0.05 |
| <b>GTF2I</b>     | 3.95 | 0.00 | <b>VIL1</b>         | 4.19 | 0.02 | <b>TPD52L1</b>  | 3.05 | 0.01 | <b>C3orf14</b>   | 3.3 | 0.02 |
| <b>FGFR2</b>     | 3.94 | 0.01 | <b>EIF4E</b>        | 4.17 | 0.03 | <b>KRT6B</b>    | 3.02 | 0.03 | <b>NASP</b>      | 3.3 | 0.02 |
| <b>TNFRSF10B</b> | 3.9  | 0.01 | <b>UBE2E3</b>       | 4.15 | 0.05 | <b>OPTN</b>     | 3.02 | 0.02 | <b>MT1E</b>      | 3.3 | 0.01 |
| <b>NAB2</b>      | 3.89 | 0.01 | <b>ELL2</b>         | 4.08 | 0.04 | <b>PCDHGA1</b>  | 3.02 | 0.01 | <b>CD44</b>      | 3.3 | 0.03 |
| <b>PPFIBP2</b>   | 3.89 | 0.03 | <b>P2RX5</b>        | 4.02 | 0.01 | <b>PXDN</b>     | 3.01 | 0.02 | <b>PH-4</b>      | 3.3 | 0.01 |
| <b>TPP1</b>      | 3.86 | 0.03 | <b>DEGS1</b>        | 4.01 | 0.04 | <b>SFRP1</b>    | 3.01 | 0.02 | <b>CD44</b>      | 3.3 | 0.01 |
| <b>NOV</b>       | 3.85 | 0.01 | <b>VIM</b>          | 3.98 | 0.04 | <b>QKI</b>      | 2.98 | 0.04 | <b>GUCY1B3</b>   | 3.3 | 0.03 |
| <b>RHOBTB3</b>   | 3.84 | 0.03 | <b>NASP</b>         | 3.98 | 0.03 | <b>SH3GL3</b>   | 2.96 | 0.02 | <b>P2RX5</b>     | 3.3 | 0.03 |
| <b>RPS6KA1</b>   | 3.83 | 0.03 | <b>TRIM2</b>        | 3.97 | 0.02 | <b>SLIT3</b>    | 2.95 | 0.03 | <b>UGT8</b>      | 3.3 | 0.04 |
| <b>FGFR2</b>     | 3.82 | 0.03 | <b>MAF</b>          | 3.97 | 0.03 | <b>MBNL2</b>    | 2.94 | 0.02 | <b>C3orf63</b>   | 3.3 | 0.04 |
| <b>SNCA</b>      | 3.81 | 0.02 | <b>BCAP29</b>       | 3.96 | 0.02 | <b>RBMS1</b>    | 2.94 | 0.01 | <b>BTG1</b>      | 3.2 | 0.03 |
| <b>NUMA1</b>     | 3.8  | 0.03 | <b>SIP1</b>         | 3.94 | 0.03 | <b>GABARAPL</b> | 2.92 | 0.00 | <b>C11orf71</b>  | 3.2 | 0.05 |
| <b>LAMP1</b>     | 3.78 | 0.03 | <b>SEMA3C</b>       | 3.93 | 0.01 | <b>PLOD1</b>    | 2.92 | 0.03 | <b>APOLD1</b>    | 3.2 | 0.04 |
| <b>ACSL1</b>     | 3.78 | 0.01 | <b>PDGFR</b>        | 3.93 | 0.03 | <b>TSC22D3</b>  | 2.91 | 0.01 | <b>MAGEF1</b>    | 3.2 | 0.03 |
| <b>THG1L</b>     | 3.78 | 0.01 | <b>SERPINB6</b>     | 3.92 | 0.05 | <b>PCDHGA1</b>  | 2.91 | 0.00 | <b>WTAP</b>      | 3.2 | 0.04 |
| <b>MB</b>        | 3.77 | 0.04 | <b>ENSA</b>         | 3.92 | 0.02 | <b>ARL4C</b>    | 2.9  | 0.03 | <b>ASTN2</b>     | 3.2 | 0.02 |
| <b>ARFGEF1</b>   | 3.77 | 0.03 | <b>CDC14A</b>       | 3.89 | 0.04 | <b>GSN</b>      | 2.89 | 0.01 | <b>SAP30</b>     | 3.2 | 0.02 |
| <b>N-PAC</b>     | 3.77 | 0.03 | <b>FOLH1</b>        | 3.89 | 0.05 | <b>TSPAN6</b>   | 2.89 | 0.01 | <b>PPP3CA</b>    | 3.2 | 0.04 |
| <b>CAPN2</b>     | 3.76 | 0.01 | <b>SYNJ1</b>        | 3.87 | 0.03 | <b>VCL</b>      | 2.89 | 0.01 | <b>TMEM45A</b>   | 3.2 | 0.05 |
| <b>PXDN</b>      | 3.76 | 0.03 | <b>CPS1</b>         | 3.85 | 0.03 | <b>DPY19L1</b>  | 2.87 | 0.01 | <b>RAP1GAP</b>   | 3.2 | 0.00 |
| <b>SPDEF</b>     | 3.76 | 0.02 | <b>MAGOH</b>        | 3.84 | 0.04 | <b>ARL4C</b>    | 2.85 | 0.02 | <b>RNASE4</b>    | 3.2 | 0.05 |
| <b>PTGES</b>     | 3.74 | 0.00 | <b>SMARCA1</b>      | 3.84 | 0.02 | <b>EPHX1</b>    | 2.84 | 0.04 | <b>HLA-DQB1</b>  | 3.1 | 0.03 |
| <b>EPB41L3</b>   | 3.74 | 0.03 | <b>KPNB1</b>        | 3.83 | 0.01 | <b>LMO4</b>     | 2.84 | 0.01 | <b>MCCC2</b>     | 3.1 | 0.03 |
| <b>LMO1</b>      | 3.73 | 0.01 | <b>IFT74</b>        | 3.83 | 0.05 | <b>DDR1</b>     | 2.83 | 0.02 | <b>SMARCA1</b>   | 3.1 | 0.03 |
| <b>SFRP1</b>     | 3.72 | 0.01 | <b>AKAP9</b>        | 3.82 | 0.02 | <b>THG1L</b>    | 2.83 | 0.05 | <b>SNAP25</b>    | 3.1 | 0.01 |
| <b>BCL2L1</b>    | 3.72 | 0.04 | <b>FABP5 /// FA</b> | 3.81 | 0.05 | <b>GADD45B</b>  | 2.82 | 0.01 | <b>DDC</b>       | 3.1 | 0.03 |
| <b>NR2F6</b>     | 3.72 | 0.04 | <b>ANK3</b>         | 3.8  | 0.01 | <b>STK38L</b>   | 2.82 | 0.05 | <b>KRT19P2</b>   | 3.1 | 0.05 |
| <b>RAB6A</b>     | 3.71 | 0.02 | <b>CDKN1B</b>       | 3.8  | 0.03 | <b>VDR</b>      | 2.82 | 0.02 | <b>ATF5</b>      | 3.1 | 0.01 |
| <b>AVPI1</b>     | 3.66 | 0.05 | <b>ANP32E</b>       | 3.8  | 0.01 | <b>EFNB3</b>    | 2.81 | 0.01 | <b>CDH10</b>     | 3.1 | 0.04 |
| <b>CASP2</b>     | 3.65 | 0.02 | <b>SNAP25</b>       | 3.79 | 0.02 | <b>PDXK</b>     | 2.81 | 0.02 | <b>GPD1L</b>     | 3.1 | 0.02 |

|           |      |      |             |      |      |         |      |      |             |     |      |
|-----------|------|------|-------------|------|------|---------|------|------|-------------|-----|------|
| SEMA3F    | 3.64 | 0.02 | CYP1A1      | 3.78 | 0.02 | NFIB    | 2.8  | 0.02 | DCPS        | 3.0 | 0.01 |
| ABHD2     | 3.64 | 0.01 | DNMBP       | 3.75 | 0.03 | ERBB2IP | 2.79 | 0.03 | NRXN1       | 3.0 | 0.01 |
| CHKA      | 3.61 | 0.05 | MAP1B       | 3.73 | 0.05 | KRT8    | 2.79 | 0.02 | PDE4B       | 3.0 | 0.02 |
| ZYX       | 3.57 | 0.02 | GARNL1      | 3.72 | 0.01 | TBX1    | 2.79 | 0.05 | EPS8        | 3.0 | 0.01 |
| RAB11B    | 3.57 | 0.03 | SLC39A8     | 3.7  | 0.04 | C5orf13 | 2.78 | 0.00 | KCNK12      | 3.0 | 0.02 |
| OAZ2      | 3.56 | 0.01 | ACTR3       | 3.7  | 0.01 | FLNA    | 2.78 | 0.02 | ACOT1 /// A | 3.0 | 0.02 |
| FBXW11    | 3.55 | 0.03 | LRRC8B      | 3.69 | 0.01 | SOX11   | 2.77 | 0.04 | ALDH5A1     | 3.0 | 0.02 |
| IDH2      | 3.55 | 0.03 | PEX7        | 3.67 | 0.02 | IL6R    | 2.77 | 0.01 | LIN7A       | 2.9 | 0.04 |
| CSNK1G2   | 3.54 | 0.01 | SEC22A      | 3.66 | 0.01 | PRKCH   | 2.77 | 0.03 | PPM1E       | 2.9 | 0.03 |
| RHOBTB3   | 3.54 | 0.01 | CBR4        | 3.62 | 0.03 | ARFGEF1 | 2.75 | 0.02 | PBLD        | 2.9 | 0.03 |
| SDC1      | 3.52 | 0.01 | C9orf82     | 3.62 | 0.01 | CTDSP2  | 2.75 | 0.05 | SNAP25      | 2.9 | 0.00 |
| DDIT4     | 3.51 | 0.03 | UCHL5       | 3.62 | 0.03 | YIPF1   | 2.74 | 0.01 | DPY19L2P2   | 2.9 | 0.05 |
| PRKCH     | 3.51 | 0.04 | RFPL1S      | 3.59 | 0.04 | PRSS21  | 2.74 | 0.01 | UNC13B      | 2.9 | 0.01 |
| TNFRSF10B | 3.5  | 0.04 | JARID1D     | 3.58 | 0.01 | S100A14 | 2.74 | 0.03 | DNMBP       | 2.9 | 0.01 |
| WDR1      | 3.5  | 0.01 | PDS5A       | 3.58 | 0.05 | DDR1    | 2.73 | 0.00 | SOD2        | 2.9 | 0.04 |
| SERPINE2  | 3.49 | 0.02 | PSIP1       | 3.54 | 0.02 | C5orf13 | 2.72 | 0.01 | SYP         | 2.9 | 0.04 |
| RHOB      | 3.46 | 0.02 | AKTIP       | 3.52 | 0.01 | CSNK2A2 | 2.71 | 0.01 | HSD17B8     | 2.9 | 0.04 |
| BCL2L1    | 3.46 | 0.02 | CNIH4       | 3.5  | 0.01 | GM2A    | 2.71 | 0.01 | SMARCA1     | 2.9 | 0.04 |
| MAP2K3    | 3.46 | 0.02 | DDC         | 3.49 | 0.04 | NUDT11  | 2.71 | 0.02 | ECHDC1      | 2.8 | 0.05 |
| MSN       | 3.45 | 0.03 | PBLD        | 3.48 | 0.01 | BNIP3   | 2.7  | 0.01 | LGALS8      | 2.8 | 0.02 |
| GHR       | 3.44 | 0.02 | RGS20       | 3.47 | 0.01 | DDIT4   | 2.7  | 0.02 | NNT         | 2.8 | 0.02 |
| MSX2      | 3.43 | 0.05 | PHTF2       | 3.44 | 0.02 | BMP5    | 2.69 | 0.04 | MFAP2       | 2.8 | 0.04 |
| CADM1     | 3.43 | 0.05 | COL3A1      | 3.44 | 0.05 | DIO1    | 2.69 | 0.04 | SLC39A8     | 2.8 | 0.03 |
| STK38L    | 3.43 | 0.01 | ACOT1 /// A | 3.42 | 0.02 | PIK3R3  | 2.69 | 0.01 | AMIGO2      | 2.8 | 0.03 |
| NCKAP1    | 3.43 | 0.02 | DUSP6       | 3.42 | 0.02 | FZD7    | 2.68 | 0.04 | SAP30       | 2.8 | 0.05 |
| SLPI      | 3.42 | 0.01 | YWHAB       | 3.41 | 0.04 | IL1R1   | 2.68 | 0.01 | CYB5A       | 2.7 | 0.03 |
| KLF5      | 3.41 | 0.02 | TSNAX       | 3.4  | 0.03 | HLA-C   | 2.68 | 0.04 | LRRC8B      | 2.7 | 0.02 |
| PIK3R1    | 3.41 | 0.05 | SERPINI1    | 3.39 | 0.01 | GADD45B | 2.67 | 0.04 | SEC23A      | 2.7 | 0.04 |
| MBNL2     | 3.4  | 0.03 | SLC12A8     | 3.39 | 0.05 | HLA-E   | 2.67 | 0.01 | NEDD4L      | 2.7 | 0.01 |
| RAB3B     | 3.4  | 0.02 | FOLH1       | 3.38 | 0.05 | PPP2R2B | 2.67 | 0.01 | ACADL       | 2.7 | 0.02 |
| BTBD2     | 3.39 | 0.02 | SYP         | 3.35 | 0.03 | NAB2    | 2.66 | 0.01 | RASIP1      | 2.7 | 0.02 |
| PAM       | 3.39 | 0.02 | ST7         | 3.34 | 0.01 | VPS37B  | 2.65 | 0.04 | C1orf218    | 2.7 | 0.05 |
| EPS8L2    | 3.39 | 0.02 | GNG4        | 3.31 | 0.02 | TIMP3   | 2.63 | 0.02 | USP18       | 2.7 | 0.04 |
| PAM       | 3.37 | 0.04 | GCA         | 3.3  | 0.03 | SH2B3   | 2.62 | 0.04 | ASB9        | 2.6 | 0.02 |
| G3BP1     | 3.36 | 0.01 | RASIP1      | 3.3  | 0.02 | C16orf5 | 2.61 | 0.01 | FAM111A     | 2.6 | 0.04 |
| CSPG4     | 3.36 | 0.04 | FUBP1       | 3.28 | 0.04 | DDR1    | 2.61 | 0.01 | NOS3        | 2.6 | 0.00 |
| AGR2      | 3.35 | 0.02 | FAM111A     | 3.28 | 0.03 | DBN1    | 2.61 | 0.01 | NIPSNAP3B   | 2.6 | 0.05 |



|         |      |      |              |      |      |         |      |      |           |     |      |
|---------|------|------|--------------|------|------|---------|------|------|-----------|-----|------|
| D4S234E | 3.35 | 0.02 | SPN          | 3.27 | 0.04 | EPAS1   | 2.61 | 0.03 | SLC12A8   | 2.6 | 0.03 |
| SLC38A2 | 3.35 | 0.02 | LGALS8       | 3.27 | 0.04 | HLA-DMA | 2.6  | 0.03 | ST7       | 2.6 | 0.03 |
| VAR5    | 3.33 | 0.04 | PICALM       | 3.27 | 0.02 | CFD     | 2.59 | 0.03 | ZSCAN16   | 2.6 | 0.02 |
| HLA-C   | 3.32 | 0.01 | GALC         | 3.26 | 0.03 | ACSL4   | 2.59 | 0.05 | GALE      | 2.6 | 0.01 |
| DIO1    | 3.31 | 0.00 | CUL4A        | 3.25 | 0.01 | GM2A    | 2.59 | 0.04 | TROVE2    | 2.6 | 0.02 |
| CRIP2   | 3.31 | 0.03 | FAM20B       | 3.25 | 0.01 | KCNG1   | 2.58 | 0.01 | PRUNE     | 2.6 | 0.03 |
| HPSE    | 3.31 | 0.01 | KIF14        | 3.25 | 0.02 | ETV5    | 2.57 | 0.02 | FAIM      | 2.6 | 0.05 |
| ANXA6   | 3.29 | 0.02 | COL5A2       | 3.25 | 0.01 | HOXC13  | 2.57 | 0.00 | SLC35D2   | 2.6 | 0.03 |
| TIMP2   | 3.29 | 0.02 | MVP          | 3.24 | 0.04 | ETS2    | 2.57 | 0.02 | PSIP1     | 2.6 | 0.03 |
| TRAF4   | 3.29 | 0.05 | UROS         | 3.24 | 0.01 | EPB41   | 2.56 | 0.03 | ASTN2     | 2.5 | 0.05 |
| NAB2    | 3.27 | 0.01 | KIAA0240     | 3.23 | 0.01 | ZFYVE21 | 2.56 | 0.03 | CDK10     | 2.5 | 0.00 |
| SLIT3   | 3.26 | 0.01 | DAZAP1       | 3.22 | 0.02 | SCGB1D2 | 2.56 | 0.00 | GAL       | 2.5 | 0.02 |
| SLC19A1 | 3.25 | 0.00 | FBXL15       | 3.22 | 0.02 | CDKN1C  | 2.55 | 0.04 | ASPHD1    | 2.5 | 0.03 |
| IGFBP5  | 3.24 | 0.02 | FLJ10038     | 3.21 | 0.05 | HLA-C   | 2.55 | 0.01 | BBS10     | 2.5 | 0.04 |
| ARL4C   | 3.23 | 0.01 | MARCKS       | 3.2  | 0.02 | PRKCH   | 2.55 | 0.02 | HBQ1      | 2.5 | 0.03 |
| SLC38A2 | 3.23 | 0.05 | ALDH5A1      | 3.2  | 0.01 | HES2    | 2.52 | 0.04 | LGALS8    | 2.5 | 0.04 |
| DNAJC3  | 3.22 | 0.04 | LIMCH1       | 3.2  | 0.01 | MYO1B   | 2.52 | 0.05 | ISG15     | 2.5 | 0.03 |
| COL13A1 | 3.21 | 0.02 | CREBL2       | 3.19 | 0.02 | STOM    | 2.52 | 0.05 | RHOBTB1   | 2.5 | 0.05 |
| PRKCH   | 3.21 | 0.02 | AZGP1 /// LO | 3.19 | 0.03 | CDKN1C  | 2.51 | 0.05 | ANGEL2    | 2.5 | 0.03 |
| TES     | 3.2  | 0.02 | MRPL24       | 3.17 | 0.02 | HLA-E   | 2.51 | 0.01 | SLC43A3   | 2.5 | 0.03 |
| F2RL1   | 3.2  | 0.02 | SNRPN        | 3.17 | 0.02 | MSN     | 2.51 | 0.01 | MRPL24    | 2.5 | 0.02 |
| CASP2   | 3.19 | 0.02 | ZBTB11       | 3.16 | 0.02 | CD40    | 2.51 | 0.02 | CEBPD     | 2.5 | 0.05 |
| CASP2   | 3.19 | 0.01 | KRIT1        | 3.16 | 0.04 | ARFGEF1 | 2.5  | 0.01 | SBNO2     | 2.5 | 0.02 |
| MAP3K1  | 3.19 | 0.03 | HNRPH2       | 3.15 | 0.02 | PDE4A   | 2.5  | 0.04 | TMEM28    | 2.5 | 0.05 |
| WIZ     | 3.19 | 0.04 | SSFA2        | 3.15 | 0.04 | PTGES   | 2.5  | 0.03 | CDC2L6    | 2.5 | 0.01 |
| MAF     | 3.18 | 0.03 | TMEM5        | 3.14 | 0.01 | COL13A1 | 2.49 | 0.05 | ABCA3     | 2.5 | 0.04 |
| LSS     | 3.18 | 0.05 | AMACR        | 3.14 | 0.04 | CDKN1C  | 2.49 | 0.01 | LOC654342 | 2.5 | 0.03 |
| HLA-E   | 3.17 | 0.03 | CEP350       | 3.14 | 0.02 | FHL1    | 2.49 | 0.05 | FAM134B   | 2.5 | 0.05 |
| RERE    | 3.17 | 0.01 | MAP4K3       | 3.13 | 0.03 | COBLL1  | 2.49 | 0.03 | HIST2H2AA | 2.4 | 0.00 |
| TSPAN6  | 3.17 | 0.02 | FAM134B      | 3.13 | 0.03 | NFIB    | 2.49 | 0.03 | NFASC     | 2.4 | 0.02 |
| IRS2    | 3.17 | 0.02 | TPTE         | 3.13 | 0.01 | PCDHGA3 | 2.49 | 0.03 | CDC2L6    | 2.4 | 0.01 |
| AGRN    | 3.17 | 0.03 | DKFZP564O    | 3.13 | 0.04 | SACS    | 2.48 | 0.02 | C19orf2   | 2.4 | 0.03 |
| HLA-C   | 3.16 | 0.01 | RABIF        | 3.12 | 0.04 | IRS2    | 2.47 | 0.01 | MSL-1     | 2.4 | 0.01 |
| NELF    | 3.16 | 0.02 | PSMAL        | 3.12 | 0.01 | SLC6A6  | 2.47 | 0.01 | SNAP91    | 2.4 | 0.01 |
| CBFA2T2 | 3.14 | 0.01 | CPT2         | 3.11 | 0.03 | LPIN1   | 2.46 | 0.05 | KIAA1467  | 2.4 | 0.04 |
| MKRN1   | 3.12 | 0.01 | CHMP2B       | 3.09 | 0.03 | NCK2    | 2.46 | 0.03 | CAND2     | 2.4 | 0.05 |
| GSN     | 3.12 | 0.03 | ACTL6B       | 3.09 | 0.03 | ID4     | 2.45 | 0.04 | CLU       | 2.4 | 0.04 |

|             |      |      |            |      |      |          |      |      |           |     |      |
|-------------|------|------|------------|------|------|----------|------|------|-----------|-----|------|
| FOXF2       | 3.11 | 0.04 | KIAA0776   | 3.08 | 0.05 | RPS6KA2  | 2.44 | 0.05 | ZNF592    | 2.4 | 0.03 |
| PER1        | 3.1  | 0.03 | CCDC91     | 3.06 | 0.01 | IRS2     | 2.44 | 0.02 | PRKCD     | 2.4 | 0.01 |
| C5orf13     | 3.09 | 0.01 | ZNF83      | 3.06 | 0.01 | RGS3     | 2.44 | 0.01 | NUP210    | 2.4 | 0.01 |
| PYGB        | 3.09 | 0.04 | PPP3CA     | 3.05 | 0.02 | PITPNC1  | 2.44 | 0.02 | ATP1B1    | 2.4 | 0.01 |
| EFNB3       | 3.09 | 0.01 | C17orf75   | 3.05 | 0.05 | TES      | 2.44 | 0.01 | WTAP      | 2.4 | 0.01 |
| CSNK1A1     | 3.09 | 0.01 | KIAA0528   | 3.05 | 0.03 | BMP1     | 2.43 | 0.04 | HIST2H2AA | 2.4 | 0.01 |
| GADD45B     | 3.09 | 0.03 | DZIP3      | 3.04 | 0.04 | LPIN1    | 2.43 | 0.03 | IGFBP2    | 2.4 | 0.02 |
| MAPK14      | 3.09 | 0.01 | NHLRC2     | 3.04 | 0.03 | ABAT     | 2.43 | 0.03 | OSBPL1A   | 2.4 | 0.04 |
| CHKA /// LO | 3.08 | 0.01 | IGF2BP3    | 3.03 | 0.01 | CD99     | 2.42 | 0.02 | SIGIRR    | 2.4 | 0.01 |
| FZD1        | 3.07 | 0.01 | HYPK       | 3.03 | 0.03 | RHOBTB3  | 2.42 | 0.04 | TIMP1     | 2.4 | 0.03 |
| KRT15       | 3.07 | 0.04 | FANCL      | 3.02 | 0.02 | SERPINE2 | 2.42 | 0.01 | ASRGL1    | 2.4 | 0.02 |
| CPSF3L      | 3.07 | 0.03 | RP6-213H19 | 3.02 | 0.01 | LBH      | 2.41 | 0.02 | BASP1     | 2.4 | 0.02 |
| PDE4A       | 3.06 | 0.03 | ATPIF1     | 3.02 | 0.01 | TP53I11  | 2.41 | 0.04 | TMEM164   | 2.4 | 0.02 |
| COL17A1     | 3.05 | 0.04 | TCEAL1     | 3    | 0.01 | DDR1     | 2.4  | 0.04 | C1orf156  | 2.4 | 0.01 |
| ST6GALNA    | 3.05 | 0.02 | FLJ12151   | 3    | 0.02 | C20orf19 | 2.39 | 0.02 | FAM20B    | 2.4 | 0.02 |
| FZD2        | 3.04 | 0.02 | ASB9       | 2.99 | 0.05 | COL17A1  | 2.39 | 0.02 | LIMCH1    | 2.3 | 0.01 |
| MLXIP       | 3.04 | 0.05 | PCMTD2     | 2.99 | 0.01 | AGRN     | 2.38 | 0.01 | PPM1H     | 2.3 | 0.05 |
| ANKH        | 3.04 | 0.02 | TROVE2     | 2.99 | 0.05 | ECE1     | 2.38 | 0.03 | PCCB      | 2.3 | 0.02 |
| PTPN21      | 3.03 | 0.02 | FKBP3      | 2.99 | 0.05 | CPSF3L   | 2.38 | 0.01 | SLC38A4   | 2.3 | 0.04 |
| SAR1A       | 3.02 | 0.04 | ANXA7      | 2.98 | 0.02 | IQGAP1   | 2.38 | 0.01 | HMGCS2    | 2.3 | 0.02 |
| NUDT11      | 3.02 | 0.02 | JMJD1B     | 2.98 | 0.04 | ANKH     | 2.37 | 0.04 | AHCTF1    | 2.3 | 0.03 |
| C20orf19    | 3.02 | 0.04 | SCN11A     | 2.98 | 0.04 | KCNK1    | 2.37 | 0.02 | HIST1H2AC | 2.3 | 0.05 |
| SOX11       | 3.01 | 0.01 | DCK        | 2.97 | 0.01 | HLA-C    | 2.36 | 0.01 | PRMT5     | 2.3 | 0.01 |
| BTN3A2      | 3.01 | 0.03 | C6orf120   | 2.97 | 0.02 | DBN1     | 2.36 | 0.04 | ATP8A1    | 2.3 | 0.02 |
| RGS10       | 3    | 0.03 | SLC25A44   | 2.97 | 0.01 | HLA-E    | 2.36 | 0.02 | RABIF     | 2.3 | 0.04 |
| PFKL        | 3    | 0.02 | DHRS2      | 2.96 | 0.03 | CADM1    | 2.35 | 0.02 | BAIAP2L2  | 2.3 | 0.02 |
| CLSTN1      | 2.99 | 0.01 | RNASE4     | 2.95 | 0.03 | NFIB     | 2.34 | 0.01 | C9orf82   | 2.3 | 0.02 |
| CCBL1       | 2.99 | 0.01 | GPD1L      | 2.95 | 0.01 | MYO10    | 2.34 | 0.05 | TRIM14    | 2.3 | 0.03 |
| ST6GALNA    | 2.99 | 0.03 | ZNF529     | 2.95 | 0.05 | ANXA6    | 2.33 | 0.03 | USP4      | 2.3 | 0.05 |
| GADD45B     | 2.98 | 0.05 | OR2J3      | 2.95 | 0.02 | DST      | 2.33 | 0.03 | TRPC1     | 2.3 | 0.03 |
| FHL1        | 2.98 | 0.01 | THOC2      | 2.95 | 0.03 | CCBL1    | 2.33 | 0.03 | MLH3      | 2.3 | 0.05 |
| SLC25A36    | 2.97 | 0.02 | HLA-DQB1   | 2.94 | 0.03 | SYT17    | 2.32 | 0.02 | C2orf24   | 2.2 | 0.01 |
| SELENBP1    | 2.97 | 0.03 | KIAA0368   | 2.94 | 0.02 | LUM      | 2.32 | 0.03 | SLIT1     | 2.2 | 0.04 |
| PTPRF       | 2.96 | 0.03 | HIST1H2AC  | 2.94 | 0.02 | RERE     | 2.3  | 0.02 | C20orf23  | 2.2 | 0.04 |
| M6PRBP1     | 2.96 | 0.02 | JTB        | 2.92 | 0.01 | DPYSL4   | 2.3  | 0.04 | CYP1A1    | 2.2 | 0.01 |
| PAFAH1B2    | 2.96 | 0.03 | HUS1       | 2.92 | 0.04 | C9orf3   | 2.3  | 0.05 | LOX       | 2.2 | 0.03 |
| MYBL1       | 2.96 | 0.03 | PPP1CB     | 2.91 | 0.01 | PGM1     | 2.3  | 0.01 | PFDN2     | 2.2 | 0.01 |

|          |      |      |            |      |      |          |      |      |            |     |      |
|----------|------|------|------------|------|------|----------|------|------|------------|-----|------|
| TIMP3    | 2.95 | 0.03 | CUL2       | 2.91 | 0.04 | COTL1    | 2.29 | 0.02 | ATF5       | 2.2 | 0.03 |
| CNN2     | 2.95 | 0.03 | PROS1      | 2.91 | 0.03 | TMEM159  | 2.29 | 0.02 | AP3B2      | 2.2 | 0.04 |
| RAC3     | 2.95 | 0.02 | PCCB       | 2.9  | 0.02 | KIF1C    | 2.29 | 0.04 | DPEP3      | 2.2 | 0.05 |
| PITX1    | 2.95 | 0.03 | YWHAB      | 2.9  | 0.01 | HECA     | 2.28 | 0.01 | SEC22A     | 2.2 | 0.04 |
| C1orf116 | 2.95 | 0.03 | ATAD4      | 2.9  | 0.05 | SLC22A18 | 2.28 | 0.01 | MTUS1      | 2.2 | 0.02 |
| PDLIM7   | 2.94 | 0.02 | PSIP1      | 2.89 | 0.05 | ZYX      | 2.28 | 0.03 | CENTA2     | 2.2 | 0.02 |
| TPD52L1  | 2.94 | 0.01 | LOC341651  | 2.89 | 0.03 | TRAF3IP2 | 2.27 | 0.02 | DEGS1      | 2.2 | 0.04 |
| PDLIM7   | 2.93 | 0.01 | DCPS       | 2.89 | 0.01 | EXT2     | 2.27 | 0.01 | FUBP1      | 2.2 | 0.03 |
| RPS6KA2  | 2.93 | 0.02 | C19orf2    | 2.89 | 0.02 | HLA-C    | 2.27 | 0.01 | SDC2       | 2.2 | 0.03 |
| KCNK1    | 2.92 | 0.02 | NET1       | 2.88 | 0.04 | IGSF3    | 2.26 | 0.04 | CLU        | 2.2 | 0.04 |
| BCL3     | 2.92 | 0.02 | PSIP1      | 2.87 | 0.05 | FAM114A1 | 2.26 | 0.03 | TJP2       | 2.2 | 0.03 |
| PGM1     | 2.91 | 0.04 | TMEM30B    | 2.85 | 0.04 | PTGES    | 2.26 | 0.03 | PGBD5      | 2.2 | 0.03 |
| BAT2     | 2.91 | 0.04 | ELOVL6     | 2.84 | 0.04 | CBX4     | 2.25 | 0.04 | TSNAX      | 2.2 | 0.04 |
| COBLL1   | 2.9  | 0.03 | LGALS8     | 2.84 | 0.04 | PRNP     | 2.25 | 0.01 | TM7SF2     | 2.2 | 0.01 |
| TP53     | 2.9  | 0.01 | UBQLN4     | 2.84 | 0.04 | GM2A     | 2.24 | 0.02 | ALDH3A2    | 2.1 | 0.01 |
| HLA-G    | 2.9  | 0.04 | EIF1AX     | 2.83 | 0.04 | COBL     | 2.24 | 0.01 | XCL2       | 2.1 | 0.04 |
| COTL1    | 2.9  | 0.01 | HNRPA3     | 2.83 | 0.01 | PFN1     | 2.24 | 0.01 | RWDD2A     | 2.1 | 0.01 |
| ARL4C    | 2.89 | 0.03 | PH-4       | 2.83 | 0.04 | TSC22D1  | 2.24 | 0.03 | RDH14      | 2.1 | 0.03 |
| NCOA2    | 2.89 | 0.04 | GBAS       | 2.82 | 0.00 | CSNK1A1  | 2.23 | 0.01 | TCEAL1     | 2.1 | 0.02 |
| TSC22D3  | 2.89 | 0.03 | SPAST      | 2.82 | 0.02 | VGLL4    | 2.23 | 0.01 | SLC17A5    | 2.1 | 0.02 |
| NKX3-1   | 2.89 | 0.02 | KLK1       | 2.81 | 0.05 | SLC1A4   | 2.23 | 0.01 | TOR3A      | 2.1 | 0.03 |
| PLEC1    | 2.88 | 0.04 | IMPACT     | 2.81 | 0.05 | SPOCK1   | 2.23 | 0.03 | MAK10      | 2.1 | 0.03 |
| RSRC1    | 2.88 | 0.01 | TOR1AIP1   | 2.8  | 0.05 | JUP      | 2.22 | 0.02 | PSEN2      | 2.1 | 0.02 |
| INSIG1   | 2.87 | 0.01 | SLIT1      | 2.79 | 0.02 | MEF2A    | 2.22 | 0.05 | SEPHS1     | 2.1 | 0.02 |
| TP53     | 2.87 | 0.04 | TTY15      | 2.79 | 0.04 | CASP2    | 2.21 | 0.04 | DPM3       | 2.1 | 0.04 |
| CAPZB    | 2.87 | 0.03 | SEPHS1     | 2.78 | 0.01 | PNRC1    | 2.21 | 0.01 | ST7        | 2.1 | 0.02 |
| STC2     | 2.85 | 0.01 | CYFIP2     | 2.78 | 0.02 | CXADR    | 2.2  | 0.05 | DDB1       | 2.1 | 0.03 |
| CSNK2A2  | 2.85 | 0.01 | UNC13B     | 2.77 | 0.03 | GPRC5C   | 2.2  | 0.02 | PLS3       | 2.1 | 0.05 |
| PDLIM2   | 2.85 | 0.03 | HIST1H3H   | 2.77 | 0.03 | GSTT1    | 2.2  | 0.02 | PKN1       | 2.1 | 0.03 |
| PIK3R3   | 2.84 | 0.04 | GUCY1B3    | 2.77 | 0.05 | ZMIZ1    | 2.2  | 0.04 | WWC1       | 2.1 | 0.05 |
| NCOA2    | 2.83 | 0.02 | ANK2       | 2.76 | 0.02 | EHD1     | 2.19 | 0.03 | AMD1       | 2.1 | 0.04 |
| ANKRD57  | 2.83 | 0.01 | HNRPA3 /// | 2.76 | 0.04 | KDELRS   | 2.19 | 0.01 | TNFSF12-TN | 2.1 | 0.02 |
| RAB3B    | 2.82 | 0.03 | PTPLB      | 2.76 | 0.01 | MTFR1    | 2.19 | 0.02 | EFTUD1     | 2.1 | 0.04 |
| MPPE1    | 2.82 | 0.03 | CAND2      | 2.76 | 0.04 | KCNK1    | 2.19 | 0.02 | STAT6      | 2.1 | 0.05 |
| UBE2H    | 2.82 | 0.01 | AHCTF1     | 2.76 | 0.03 | IFI30    | 2.18 | 0.02 | RBM12      | 2.1 | 0.04 |
| SAT1     | 2.81 | 0.02 | UBE2J1     | 2.76 | 0.03 | ABHD2    | 2.17 | 0.01 | PRUNE      | 2.1 | 0.02 |
| RTN2     | 2.81 | 0.05 | MBD1       | 2.75 | 0.03 | ST6GALNA | 2.17 | 0.01 | TOR1A      | 2.1 | 0.05 |

|             |      |      |           |      |      |            |      |      |           |     |      |
|-------------|------|------|-----------|------|------|------------|------|------|-----------|-----|------|
| DDR1        | 2.8  | 0.03 | MCCC2     | 2.75 | 0.02 | SEC31A     | 2.17 | 0.01 | TMEM30B   | 2.1 | 0.03 |
| PRSS21      | 2.78 | 0.02 | HIST2H2AA | 2.75 | 0.00 | ZNF277     | 2.17 | 0.02 | PHF15     | 2.1 | 0.03 |
| VPS37B      | 2.78 | 0.02 | CHGA      | 2.74 | 0.05 | ITPR3      | 2.16 | 0.01 | DDX50     | 2.1 | 0.03 |
| FKBP8       | 2.78 | 0.00 | ITGB5     | 2.74 | 0.03 | STOM       | 2.16 | 0.03 | AUH       | 2.1 | 0.03 |
| TPD52L1     | 2.77 | 0.01 | FARSA     | 2.74 | 0.03 | BNIP2      | 2.15 | 0.01 | DIDO1     | 2.1 | 0.03 |
| CD164       | 2.77 | 0.01 | CD44      | 2.73 | 0.04 | GGH        | 2.15 | 0.01 | KIF15     | 2.1 | 0.02 |
| HPCAL1      | 2.77 | 0.05 | RBM26     | 2.73 | 0.03 | MRPL22     | 2.15 | 0.01 | MAN1A1    | 2.1 | 0.05 |
| DPY19L1     | 2.77 | 0.02 | EFTUD1    | 2.73 | 0.02 | BIN1       | 2.14 | 0.03 | TXNRD3    | 2.0 | 0.05 |
| GM2A        | 2.77 | 0.02 | TJP2      | 2.72 | 0.01 | TSC22D3    | 2.14 | 0.02 | ARHGAP15  | 2.0 | 0.05 |
| PPP1R10     | 2.75 | 0.02 | HNMT      | 2.72 | 0.00 | DEF6       | 2.14 | 0.03 | HIST1H3H  | 2.0 | 0.03 |
| GADD45G     | 2.75 | 0.01 | C4orf20   | 2.72 | 0.04 | PDLIM7     | 2.14 | 0.04 | ADAM22    | 2.0 | 0.04 |
| INPP5A      | 2.74 | 0.03 | EFNB2     | 2.71 | 0.02 | HOXA1      | 2.14 | 0.03 | RUNDC3A   | 2.0 | 0.02 |
| MAPRE3      | 2.74 | 0.01 | BLVRA     | 2.71 | 0.03 | ANKMY2     | 2.14 | 0.02 | ALDH3A2   | 2.0 | 0.01 |
| PRNP        | 2.74 | 0.03 | CEP27     | 2.71 | 0.01 | NAGA       | 2.14 | 0.04 | JTB       | 2.0 | 0.04 |
| RFPL3       | 2.73 | 0.02 | C1orf107  | 2.7  | 0.02 | SLC1A4     | 2.14 | 0.04 | DNAJC16   | 2.0 | 0.04 |
| PITX1       | 2.73 | 0.01 | FAM115A   | 2.7  | 0.02 | SNTA1      | 2.14 | 0.02 | RABIF     | 2.0 | 0.05 |
| C5orf13     | 2.72 | 0.02 | EPS15     | 2.7  | 0.04 | B4GALT1    | 2.14 | 0.02 | RPS6KC1   | 2.0 | 0.03 |
| BAT2        | 2.72 | 0.02 | LRRC40    | 2.7  | 0.01 | BTN3A2 /// | 2.13 | 0.03 | BLVRA     | 2.0 | 0.05 |
| EIF4G1      | 2.72 | 0.03 | GCNT1     | 2.69 | 0.05 | IQGAP1     | 2.12 | 0.03 | KIAA0133  | 2.0 | 0.01 |
| MXD4        | 2.72 | 0.02 | ASB1      | 2.69 | 0.04 | F12        | 2.11 | 0.02 | ULK2      | 2.0 | 0.03 |
| PFN1        | 2.71 | 0.02 | RDH14     | 2.69 | 0.02 | FLJ20035   | 2.11 | 0.04 | HOXA10    | 2.0 | 0.04 |
| AP2B1       | 2.7  | 0.05 | CASP6     | 2.68 | 0.03 | INPP5A     | 2.11 | 0.01 | EIF2AK1   | 2.0 | 0.03 |
| MAN2A1      | 2.7  | 0.01 | YEATS4    | 2.68 | 0.02 | ALDH7A1    | 2.1  | 0.03 | MBD1      | 2.0 | 0.05 |
| CDK2        | 2.7  | 0.03 | TRIM8     | 2.68 | 0.04 | ATP2C1     | 2.1  | 0.03 | SIGIRR    | 2.0 | 0.02 |
| GRB14       | 2.69 | 0.01 | SBNO2     | 2.66 | 0.03 | ENY2       | 2.1  | 0.01 | OR7E37P   | 2.0 | 0.03 |
| C16orf5     | 2.69 | 0.05 | EZR       | 2.66 | 0.02 | ELF3       | 2.1  | 0.02 | C7orf49   | 2.0 | 0.04 |
| ACVR1B      | 2.68 | 0.04 | PPAP2A    | 2.66 | 0.02 | EHD1       | 2.1  | 0.05 | RBM16     | 2.0 | 0.05 |
| SLC25A10    | 2.68 | 0.03 | CENTB2    | 2.66 | 0.01 | EHD1       | 2.1  | 0.05 | MRS2L     | 2.0 | 0.03 |
| AGPAT2      | 2.68 | 0.02 | LOC729799 | 2.66 | 0.03 | DBI        | 2.09 | 0.01 | COL5A2    | 2.0 | 0.04 |
| DISC1       | 2.67 | 0.02 | FLJ13611  | 2.66 | 0.03 | AIM1       | 2.08 | 0.03 | PTGER3    | 2.0 | 0.05 |
| HLA-C       | 2.67 | 0.05 | BTG1      | 2.65 | 0.03 | AES        | 2.08 | 0.01 | LOC222070 | 2.0 | 0.02 |
| HEY1        | 2.67 | 0.05 | RCAN2     | 2.65 | 0.04 | ATP11A     | 2.08 | 0.05 | PITPNA    | 2.0 | 0.02 |
| IQGAP1      | 2.66 | 0.05 | CD44      | 2.65 | 0.03 | NFIB       | 2.08 | 0.02 | AP1G2     | 2.0 | 0.05 |
| KIAA1245 // | 2.66 | 0.03 | USP18     | 2.65 | 0.03 | ZNF185     | 2.08 | 0.02 | STX6      | 2.0 | 0.04 |
| ENY2        | 2.66 | 0.01 | ATP1B1    | 2.64 | 0.04 | PELI2      | 2.07 | 0.02 | RASA4     | 2.0 | 0.05 |
| BMP5        | 2.65 | 0.01 | RAG1AP1   | 2.63 | 0.03 | STC2       | 2.07 | 0.03 | CUTC      | 2.0 | 0.02 |
| NDRG3       | 2.65 | 0.04 | PIGA      | 2.62 | 0.04 | SMARCA2    | 2.07 | 0.05 | FAM46A    | 2.0 | 0.03 |

|                 |      |      |                  |      |      |                |      |      |                    |     |      |
|-----------------|------|------|------------------|------|------|----------------|------|------|--------------------|-----|------|
| <b>EHBP1L1</b>  | 2.65 | 0.01 | <b>CHMP4A</b>    | 2.62 | 0.02 | <b>BNIP3L</b>  | 2.06 | 0.04 | <b>ERBB4</b>       | 2.0 | 0.05 |
| <b>IL1R1</b>    | 2.64 | 0.04 | <b>DOCK9</b>     | 2.61 | 0.05 | <b>GPC1</b>    | 2.06 | 0.05 | <b>ARMCX5</b>      | 2.0 | 0.03 |
| <b>HPCAL1</b>   | 2.64 | 0.03 | <b>RRP15</b>     | 2.61 | 0.04 | <b>ARL6IP5</b> | 2.06 | 0.01 | <b>BLVRA</b>       | 2.0 | 0.01 |
| <b>DPYSL4</b>   | 2.64 | 0.02 | <b>SLC39A8</b>   | 2.61 | 0.01 | <b>DNPEP</b>   | 2.05 | 0.03 | <b>FUBP1</b>       | 2.0 | 0.04 |
| <b>NRXN2</b>    | 2.64 | 0.02 | <b>SUCLA2</b>    | 2.59 | 0.03 | <b>EFHA1</b>   | 2.05 | 0.02 | <b>TARS2</b>       | 2.0 | 0.02 |
| <b>SAT1</b>     | 2.63 | 0.03 | <b>CREBZF</b>    | 2.59 | 0.01 | <b>SIX2</b>    | 2.05 | 0.03 | <b>GDF15</b>       | 2.0 | 0.02 |
| <b>SREBF2</b>   | 2.62 | 0.03 | <b>PAX3</b>      | 2.59 | 0.05 | <b>BIN1</b>    | 2.04 | 0.02 | <b>PSD4</b>        | 2.0 | 0.02 |
| <b>CBX2</b>     | 2.62 | 0.03 | <b>LOC644450</b> | 2.59 | 0.02 | <b>CTSF</b>    | 2.04 | 0.04 | <b>SCAMP3</b>      | 2.0 | 0.03 |
| <b>CLIC4</b>    | 2.61 | 0.01 | <b>ACADM</b>     | 2.58 | 0.04 | <b>CHKA</b>    | 2.04 | 0.02 | <b>TAF7L</b>       | 2.0 | 0.05 |
| <b>PDCD4</b>    | 2.61 | 0.05 | <b>NUP50</b>     | 2.58 | 0.01 | <b>GPR177</b>  | 2.04 | 0.04 | <b>UCKL1</b>       | 2.0 | 0.03 |
| <b>LOXL2</b>    | 2.61 | 0.05 | <b>SIGIRR</b>    | 2.58 | 0.02 | <b>KRT18</b>   | 2.04 | 0.05 | <b>XCL1 /// XC</b> | 2.0 | 0.05 |
| <b>EEF1D</b>    | 2.61 | 0.01 | <b>UBE2D2</b>    | 2.57 | 0.04 | <b>RXRA</b>    | 2.04 | 0.02 | <b>SMCHD1</b>      | 2.0 | 0.02 |
| <b>C20orf11</b> | 2.61 | 0.03 | <b>IMPA1</b>     | 2.57 | 0.03 | <b>CTNNA1</b>  | 2.03 | 0.02 | <b>NEBL</b>        | 2.0 | 0.05 |
| <b>HOXC13</b>   | 2.61 | 0.02 | <b>ISG15</b>     | 2.57 | 0.03 | <b>CXorf57</b> | 2.03 | 0.02 | <b>PARP1</b>       | 1.9 | 0.02 |
| <b>FLJ20323</b> | 2.6  | 0.01 | <b>FUSIP1</b>    | 2.57 | 0.02 | <b>LPCAT1</b>  | 2.03 | 0.04 | <b>C16orf42</b>    | 1.9 | 0.05 |
| <b>DNAJB1</b>   | 2.59 | 0.02 | <b>AMACR</b>     | 2.57 | 0.02 | <b>IFI6</b>    | 2.03 | 0.03 | <b>TMEM47</b>      | 1.9 | 0.02 |
| <b>LRPAP1</b>   | 2.59 | 0.02 | <b>CCDC109B</b>  | 2.57 | 0.03 | <b>PTEN</b>    | 2.03 | 0.02 | <b>CALM3</b>       | 1.9 | 0.02 |
| <b>EVL</b>      | 2.59 | 0.03 | <b>ATMIN</b>     | 2.56 | 0.03 | <b>RFPL3</b>   | 2.03 | 0.02 | <b>HTATIP2</b>     | 1.9 | 0.04 |
| <b>YIPF5</b>    | 2.59 | 0.03 | <b>ALDH3A2</b>   | 2.55 | 0.01 | <b>RARG</b>    | 2.02 | 0.05 | <b>LGALS8</b>      | 1.9 | 0.03 |
| <b>USP5</b>     | 2.58 | 0.00 | <b>SLC35D2</b>   | 2.55 | 0.02 | <b>RSL1D1</b>  | 2.01 | 0.04 | <b>MARCKS</b>      | 1.9 | 0.05 |
| <b>TSPAN6</b>   | 2.58 | 0.02 | <b>PLS3</b>      | 2.54 | 0.02 | <b>ETV5</b>    | 2.01 | 0.01 | <b>RAG1AP1</b>     | 1.9 | 0.05 |
| <b>PDLIM7</b>   | 2.58 | 0.03 | <b>MED14</b>     | 2.54 | 0.03 | <b>MTFR1</b>   | 2.01 | 0.03 | <b>RAP1GDS1</b>    | 1.9 | 0.04 |
| <b>N-PAC</b>    | 2.58 | 0.04 | <b>NNT</b>       | 2.54 | 0.04 | <b>NCOA2</b>   | 2.01 | 0.03 | <b>MST1</b>        | 1.9 | 0.04 |
| <b>ETS2</b>     | 2.57 | 0.05 | <b>CALCB</b>     | 2.54 | 0.02 | <b>TLE2</b>    | 2.01 | 0.02 | <b>GPR126</b>      | 1.9 | 0.03 |
| <b>COL16A1</b>  | 2.57 | 0.05 | <b>MEMO1</b>     | 2.54 | 0.03 | <b>EXT1</b>    | 2    | 0.03 | <b>NMU</b>         | 1.9 | 0.02 |
| <b>AP3D1</b>    | 2.57 | 0.04 | <b>LGR4</b>      | 2.53 | 0.05 | <b>KRT10</b>   | 2    | 0.03 | <b>NUP98</b>       | 1.9 | 0.05 |
| <b>KIAA0828</b> | 2.57 | 0.01 | <b>OAZ3</b>      | 2.53 | 0.02 | <b>LEPRE1</b>  | 2    | 0.03 | <b>PODXL</b>       | 1.9 | 0.04 |
| <b>S100A14</b>  | 2.57 | 0.03 | <b>ZNF764</b>    | 2.53 | 0.04 | <b>FOS</b>     | 2    | 0.04 | <b>UCHL5</b>       | 1.9 | 0.03 |
| <b>CNOT8</b>    | 2.56 | 0.04 | <b>SYNCRIP</b>   | 2.52 | 0.04 | <b>SEC31A</b>  | 2    | 0.03 | <b>LPGAT1</b>      | 1.9 | 0.05 |
| <b>TRAF4</b>    | 2.56 | 0.02 | <b>KIAA1467</b>  | 2.52 | 0.03 | <b>HSPA4</b>   | 1.99 | 0.01 | <b>LASP1</b>       | 1.9 | 0.02 |
| <b>GAMT</b>     | 2.56 | 0.03 | <b>LOC441453</b> | 2.52 | 0.04 | <b>INSIG1</b>  | 1.99 | 0.02 | <b>CALCB</b>       | 1.9 | 0.03 |
| <b>UBE2G2</b>   | 2.56 | 0.03 | <b>PLEKHB2</b>   | 2.51 | 0.04 | <b>KRT10</b>   | 1.99 | 0.01 | <b>CHMP4A</b>      | 1.9 | 0.01 |
| <b>SCARB2</b>   | 2.55 | 0.01 | <b>SCNN1A</b>    | 2.51 | 0.05 | <b>PTRF</b>    | 1.99 | 0.05 | <b>AMD1</b>        | 1.9 | 0.03 |
| <b>ZNF185</b>   | 2.55 | 0.04 | <b>PAPOLA</b>    | 2.51 | 0.04 | <b>MORC2</b>   | 1.98 | 0.01 | <b>AHI1</b>        | 1.9 | 0.05 |
| <b>MARCKS</b>   | 2.54 | 0.01 | <b>TULP4</b>     | 2.51 | 0.02 | <b>LPIN1</b>   | 1.98 | 0.01 | <b>L1CAM</b>       | 1.9 | 0.04 |
| <b>FLJ20323</b> | 2.54 | 0.02 | <b>TBC1D8</b>    | 2.5  | 0.02 | <b>TP53I11</b> | 1.98 | 0.02 | <b>C6orf120</b>    | 1.9 | 0.02 |
| <b>HLA-DMA</b>  | 2.54 | 0.03 | <b>NEDD4L</b>    | 2.5  | 0.02 | <b>PLEC1</b>   | 1.98 | 0.03 | <b>WBSCR22</b>     | 1.9 | 0.02 |

|        |      |      |          |      |      |         |      |      |          |     |      |
|--------|------|------|----------|------|------|---------|------|------|----------|-----|------|
| LGR5   | 2.53 | 0.03 | DTL      | 2.49 | 0.01 | TOX     | 1.98 | 0.04 | JTB      | 1.9 | 0.03 |
| PEX5   | 2.53 | 0.01 | NMU      | 2.48 | 0.01 | B4GALT1 | 1.98 | 0.01 | KIF13B   | 1.9 | 0.04 |
| GPRC5C | 2.53 | 0.02 | ANXA11   | 2.48 | 0.01 | UCP2    | 1.98 | 0.01 | OCRL     | 1.9 | 0.02 |
| USP36  | 2.53 | 0.04 | HOPX     | 2.48 | 0.02 | AMBP    | 1.97 | 0.02 | MTUS1    | 1.9 | 0.03 |
| VCL    | 2.52 | 0.03 | DMXL2    | 2.48 | 0.02 | DDX11   | 1.97 | 0.02 | GCH1     | 1.9 | 0.05 |
| EXT1   | 2.52 | 0.01 | ARMCX5   | 2.48 | 0.01 | DBI     | 1.97 | 0.03 | TMEM177  | 1.9 | 0.03 |
| DCN    | 2.52 | 0.04 | RUFY3    | 2.47 | 0.03 | GAMT    | 1.97 | 0.03 | ITSN2    | 1.9 | 0.05 |
| TLE2   | 2.51 | 0.04 | COL9A3   | 2.47 | 0.02 | PITX1   | 1.97 | 0.03 | ICMT     | 1.9 | 0.03 |
| ADA    | 2.5  | 0.04 | ETFDH    | 2.47 | 0.01 | PRCP    | 1.97 | 0.02 | SCRN1    | 1.9 | 0.02 |
| ATP2C1 | 2.5  | 0.04 | GGCX     | 2.47 | 0.05 | SPATA6  | 1.97 | 0.05 | WWC1     | 1.9 | 0.02 |
| PLOD1  | 2.49 | 0.02 | SDHC     | 2.47 | 0.02 | SGPL1   | 1.97 | 0.03 | NEBL     | 1.9 | 0.04 |
| KRT18  | 2.49 | 0.02 | CSE1L    | 2.46 | 0.02 | ATP2C1  | 1.96 | 0.03 | PARD6A   | 1.9 | 0.05 |
| EXT2   | 2.49 | 0.02 | FAM20B   | 2.45 | 0.03 | BIN1    | 1.96 | 0.03 | CAP2     | 1.9 | 0.04 |
| EPHX1  | 2.49 | 0.02 | AKAP11   | 2.45 | 0.05 | CSNK1A1 | 1.96 | 0.00 | HOPX     | 1.9 | 0.02 |
| DDR1   | 2.49 | 0.01 | ASTN2    | 2.45 | 0.04 | EPN2    | 1.96 | 0.02 | PPP1R1A  | 1.9 | 0.04 |
| SCAMP1 | 2.49 | 0.01 | PPM1H    | 2.45 | 0.02 | YIPF5   | 1.96 | 0.01 | FECH     | 1.9 | 0.03 |
| COBL   | 2.49 | 0.01 | SEH1L    | 2.45 | 0.02 | SLC1A4  | 1.96 | 0.02 | CDV3     | 1.9 | 0.01 |
| LTBP4  | 2.49 | 0.01 | USP4     | 2.44 | 0.05 | RBM9    | 1.96 | 0.03 | CRELD2   | 1.9 | 0.01 |
| BRCA2  | 2.49 | 0.01 | TRIM14   | 2.44 | 0.01 | SSBP2   | 1.96 | 0.05 | MRPS14   | 1.9 | 0.01 |
| PLXNB1 | 2.49 | 0.01 | PSMD11   | 2.44 | 0.04 | TRPV6   | 1.96 | 0.04 | NVL      | 1.9 | 0.01 |
| EXOSC4 | 2.49 | 0.03 | RWDD2A   | 2.44 | 0.02 | F2RL1   | 1.95 | 0.02 | ACE      | 1.8 | 0.04 |
| PFKFB3 | 2.48 | 0.04 | NET1     | 2.43 | 0.04 | EML1    | 1.95 | 0.05 | CSPG5    | 1.8 | 0.03 |
| PDXK   | 2.48 | 0.01 | ANG      | 2.43 | 0.01 | IFITM2  | 1.95 | 0.04 | MYO6     | 1.8 | 0.04 |
| IFI6   | 2.48 | 0.01 | HNRNPA2B | 2.43 | 0.01 | LRPAP1  | 1.95 | 0.01 | NELL2    | 1.8 | 0.03 |
| HLA-G  | 2.48 | 0.01 | PNPLA4   | 2.43 | 0.04 | MCF2L   | 1.95 | 0.03 | FARSA    | 1.8 | 0.02 |
| SLC1A4 | 2.48 | 0.02 | RCBTB1   | 2.43 | 0.02 | NRXN2   | 1.95 | 0.04 | ADAMTS1  | 1.8 | 0.04 |
| PCLO   | 2.48 | 0.05 | DNAJC10  | 2.43 | 0.05 | NINJ1   | 1.95 | 0.01 | KIAA0859 | 1.8 | 0.05 |
| NDST1  | 2.47 | 0.01 | TOR1A    | 2.42 | 0.03 | G3BP1   | 1.95 | 0.05 | FH       | 1.8 | 0.03 |
| DPYSL4 | 2.47 | 0.02 | ITSN2    | 2.42 | 0.05 | USP8    | 1.95 | 0.03 | GOLGA5   | 1.8 | 0.04 |
| VEGFA  | 2.47 | 0.01 | CHD9     | 2.42 | 0.05 | ATP1B3  | 1.94 | 0.04 | LRRTM4   | 1.8 | 0.04 |
| MICAL3 | 2.47 | 0.02 | PRMT5    | 2.42 | 0.02 | CRIP2   | 1.94 | 0.02 | INTS3    | 1.8 | 0.02 |
| MBOAT2 | 2.47 | 0.05 | USP48    | 2.42 | 0.01 | RBM35A  | 1.94 | 0.01 | SARM1    | 1.8 | 0.03 |
| TWF1   | 2.47 | 0.05 | PLOD2    | 2.41 | 0.05 | PXN     | 1.94 | 0.01 | TRAF5    | 1.8 | 0.05 |
| RAP2B  | 2.46 | 0.03 | HIST1H1C | 2.41 | 0.05 | CLIC4   | 1.93 | 0.02 | DET1     | 1.8 | 0.02 |
| ENO1   | 2.46 | 0.02 | LRCH3    | 2.41 | 0.03 | BEAN    | 1.93 | 0.04 | IVNS1ABP | 1.8 | 0.04 |
| CORO1B | 2.46 | 0.04 | CENPN    | 2.41 | 0.01 | MB      | 1.93 | 0.02 | SLC29A1  | 1.8 | 0.01 |
| NRGN   | 2.45 | 0.02 | ATF5     | 2.4  | 0.03 | SLC16A1 | 1.93 | 0.05 | STX1A    | 1.8 | 0.04 |

|                 |      |      |                  |      |      |                 |      |      |                  |     |      |
|-----------------|------|------|------------------|------|------|-----------------|------|------|------------------|-----|------|
| <b>TMEM159</b>  | 2.45 | 0.04 | <b>ZNF223</b>    | 2.4  | 0.05 | <b>TYRO3</b>    | 1.93 | 0.04 | <b>TXNRD2</b>    | 1.8 | 0.04 |
| <b>ACSL1</b>    | 2.44 | 0.00 | <b>CSHL1</b>     | 2.4  | 0.03 | <b>CD97</b>     | 1.92 | 0.03 | <b>VAV1</b>      | 1.8 | 0.03 |
| <b>SYMPK</b>    | 2.44 | 0.01 | <b>TRIM24</b>    | 2.4  | 0.02 | <b>TMC6</b>     | 1.92 | 0.03 | <b>CD2AP</b>     | 1.8 | 0.03 |
| <b>TES</b>      | 2.44 | 0.02 | <b>REV1</b>      | 2.4  | 0.03 | <b>RAB15</b>    | 1.92 | 0.01 | <b>C1orf34</b>   | 1.8 | 0.04 |
| <b>KRT36</b>    | 2.44 | 0.01 | <b>PRPF4B</b>    | 2.39 | 0.04 | <b>P4HA1</b>    | 1.92 | 0.01 | <b>DUT</b>       | 1.8 | 0.02 |
| <b>ODC1</b>     | 2.43 | 0.02 | <b>SMAD2</b>     | 2.39 | 0.05 | <b>STK17A</b>   | 1.92 | 0.02 | <b>ROGDI</b>     | 1.8 | 0.04 |
| <b>ARFGEF1</b>  | 2.43 | 0.01 | <b>CENTA2</b>    | 2.39 | 0.03 | <b>CTSC</b>     | 1.91 | 0.03 | <b>C3orf60</b>   | 1.8 | 0.02 |
| <b>SH2B3</b>    | 2.43 | 0.02 | <b>ZSCAN16</b>   | 2.39 | 0.03 | <b>HBEGF</b>    | 1.91 | 0.04 | <b>WHSC1</b>     | 1.8 | 0.04 |
| <b>GM2A</b>     | 2.43 | 0.01 | <b>ZNF587</b>    | 2.39 | 0.02 | <b>CCNB1IP1</b> | 1.91 | 0.02 | <b>DECR2</b>     | 1.8 | 0.05 |
| <b>GOLM1</b>    | 2.43 | 0.01 | <b>PPP1R1A</b>   | 2.38 | 0.03 | <b>NFIB</b>     | 1.91 | 0.05 | <b>CHD1L</b>     | 1.8 | 0.03 |
| <b>ACCN2</b>    | 2.42 | 0.03 | <b>HLA-DRB1</b>  | 2.38 | 0.01 | <b>G3BP1</b>    | 1.91 | 0.01 | <b>KIAA1279</b>  | 1.8 | 0.02 |
| <b>BMP1</b>     | 2.42 | 0.01 | <b>PATZ1</b>     | 2.37 | 0.04 | <b>STK38L</b>   | 1.91 | 0.02 | <b>DPAGT1</b>    | 1.8 | 0.03 |
| <b>CBLC</b>     | 2.42 | 0.02 | <b>MRPL9</b>     | 2.37 | 0.03 | <b>SLC6A3</b>   | 1.91 | 0.02 | <b>LOC400451</b> | 1.8 | 0.04 |
| <b>OGFR</b>     | 2.41 | 0.03 | <b>PHF15</b>     | 2.37 | 0.03 | <b>DCN</b>      | 1.9  | 0.05 | <b>LUZP2</b>     | 1.8 | 0.03 |
| <b>GLTPD1</b>   | 2.41 | 0.03 | <b>SNAPC5</b>    | 2.37 | 0.04 | <b>EFNA1</b>    | 1.9  | 0.03 | <b>DARS2</b>     | 1.8 | 0.02 |
| <b>FXD1</b>     | 2.4  | 0.02 | <b>RNF17</b>     | 2.37 | 0.04 | <b>FXD5</b>     | 1.9  | 0.04 | <b>WHSC1</b>     | 1.8 | 0.02 |
| <b>C10orf10</b> | 2.4  | 0.02 | <b>SUCLG2</b>    | 2.36 | 0.01 | <b>GTF2E2</b>   | 1.9  | 0.05 | <b>GTF3A</b>     | 1.8 | 0.03 |
| <b>BIN1</b>     | 2.4  | 0.05 | <b>PTBP2</b>     | 2.36 | 0.04 | <b>GRHL2</b>    | 1.9  | 0.01 | <b>H2AFX</b>     | 1.8 | 0.02 |
| <b>PIP5K1A</b>  | 2.4  | 0.04 | <b>TUSC2</b>     | 2.35 | 0.03 | <b>S100A10</b>  | 1.9  | 0.03 | <b>ATMIN</b>     | 1.8 | 0.03 |
| <b>LPIN1</b>    | 2.4  | 0.05 | <b>HES1</b>      | 2.35 | 0.05 | <b>TPM4</b>     | 1.9  | 0.01 | <b>RRM2</b>      | 1.8 | 0.03 |
| <b>OPTN</b>     | 2.39 | 0.04 | <b>STX6</b>      | 2.35 | 0.03 | <b>AP3B1</b>    | 1.89 | 0.01 | <b>TIPRL</b>     | 1.8 | 0.03 |
| <b>GSS</b>      | 2.39 | 0.02 | <b>ASAH1</b>     | 2.35 | 0.02 | <b>C5orf5</b>   | 1.89 | 0.03 | <b>XPNPEP1</b>   | 1.8 | 0.02 |
| <b>KCND3</b>    | 2.39 | 0.01 | <b>ESD</b>       | 2.35 | 0.04 | <b>CD55</b>     | 1.89 | 0.03 | <b>INTS1</b>     | 1.8 | 0.02 |
| <b>LYPLA2</b>   | 2.39 | 0.03 | <b>TRIM24</b>    | 2.34 | 0.01 | <b>CAMK2N1</b>  | 1.89 | 0.02 | <b>JTB</b>       | 1.8 | 0.01 |
| <b>VDAC1</b>    | 2.39 | 0.03 | <b>HMGCS2</b>    | 2.33 | 0.02 | <b>PGK1</b>     | 1.89 | 0.02 | <b>MAGED1</b>    | 1.8 | 0.03 |
| <b>ABHD2</b>    | 2.39 | 0.05 | <b>SRI</b>       | 2.33 | 0.01 | <b>GSTK1</b>    | 1.88 | 0.01 | <b>SEC23A</b>    | 1.8 | 0.03 |
| <b>PGK1</b>     | 2.38 | 0.03 | <b>RPS6KC1</b>   | 2.33 | 0.03 | <b>RNF44</b>    | 1.88 | 0.05 | <b>SMUG1</b>     | 1.8 | 0.02 |
| <b>CD99</b>     | 2.38 | 0.02 | <b>DECR2</b>     | 2.33 | 0.04 | <b>CLIC4</b>    | 1.87 | 0.02 | <b>XPNPEP1</b>   | 1.8 | 0.03 |
| <b>EPN2</b>     | 2.38 | 0.02 | <b>ALK</b>       | 2.32 | 0.04 | <b>HEY1</b>     | 1.87 | 0.03 | <b>C1orf35</b>   | 1.8 | 0.05 |
| <b>SORBS3</b>   | 2.38 | 0.03 | <b>C1orf156</b>  | 2.32 | 0.02 | <b>HK2</b>      | 1.87 | 0.02 | <b>GYG1</b>      | 1.8 | 0.04 |
| <b>HECA</b>     | 2.38 | 0.02 | <b>C14orf108</b> | 2.32 | 0.03 | <b>FLJ13236</b> | 1.87 | 0.02 | <b>ZSCAN18</b>   | 1.8 | 0.05 |
| <b>IFITM2</b>   | 2.37 | 0.02 | <b>COMMD8</b>    | 2.32 | 0.04 | <b>ITGA6</b>    | 1.87 | 0.04 | <b>PSME3</b>     | 1.8 | 0.05 |
| <b>MAX</b>      | 2.37 | 0.03 | <b>CLMN</b>      | 2.32 | 0.04 | <b>MKNK2</b>    | 1.87 | 0.03 | <b>PPP2R5A</b>   | 1.8 | 0.04 |
| <b>CALU</b>     | 2.37 | 0.02 | <b>SCYE1</b>     | 2.31 | 0.04 | <b>QSOX1</b>    | 1.87 | 0.04 | <b>APPL1</b>     | 1.8 | 0.05 |
| <b>ZNHIT4</b>   | 2.37 | 0.02 | <b>KIF13B</b>    | 2.31 | 0.05 | <b>SEMA3F</b>   | 1.87 | 0.02 | <b>RFK</b>       | 1.8 | 0.04 |
| <b>SORBS2</b>   | 2.36 | 0.05 | <b>GNPAT</b>     | 2.3  | 0.03 | <b>BMP2</b>     | 1.86 | 0.01 | <b>TMEM93</b>    | 1.8 | 0.02 |
| <b>BMP7</b>     | 2.36 | 0.02 | <b>KIAA0894</b>  | 2.3  | 0.02 | <b>GOLIM4</b>   | 1.86 | 0.02 | <b>MAOA</b>      | 1.8 | 0.05 |

|          |      |      |            |      |      |           |      |      |           |     |      |
|----------|------|------|------------|------|------|-----------|------|------|-----------|-----|------|
| EPHB4    | 2.35 | 0.05 | RAP1GDS1   | 2.3  | 0.05 | LDLR      | 1.86 | 0.04 | MYO6      | 1.8 | 0.02 |
| PALM     | 2.35 | 0.04 | PAXIP1     | 2.3  | 0.02 | SEC14L1   | 1.86 | 0.02 | SSH3      | 1.8 | 0.02 |
| TMED9    | 2.35 | 0.04 | CAMK1      | 2.29 | 0.04 | SLC22A18A | 1.86 | 0.03 | SLC13A3   | 1.8 | 0.05 |
| CCK      | 2.35 | 0.05 | CTSZ       | 2.29 | 0.05 | TGIF1     | 1.86 | 0.03 | ACADVL    | 1.7 | 0.02 |
| GTF3C2   | 2.35 | 0.01 | SLC5A3     | 2.29 | 0.03 | TRIM29    | 1.86 | 0.05 | EDG7      | 1.7 | 0.05 |
| PIK3CB   | 2.35 | 0.01 | ABHD5      | 2.29 | 0.03 | CLSTN1    | 1.85 | 0.03 | C2orf24   | 1.7 | 0.05 |
| TMCO3    | 2.35 | 0.04 | PAICS      | 2.29 | 0.03 | KRT36     | 1.85 | 0.03 | DALRD3    | 1.7 | 0.02 |
| SH3BP4   | 2.35 | 0.04 | HSDL2      | 2.29 | 0.02 | NAB1      | 1.85 | 0.04 | SMC2      | 1.7 | 0.05 |
| DAP      | 2.34 | 0.04 | RABIF      | 2.28 | 0.02 | YAP1      | 1.85 | 0.02 | SNX27     | 1.7 | 0.03 |
| RBMS1    | 2.34 | 0.03 | FGF13      | 2.28 | 0.03 | BMP1      | 1.84 | 0.05 | ZNF107    | 1.7 | 0.05 |
| CD40     | 2.34 | 0.01 | ELK4       | 2.28 | 0.02 | FRAT1     | 1.84 | 0.02 | CFLAR     | 1.7 | 0.02 |
| TNS1     | 2.34 | 0.02 | PAQR3      | 2.28 | 0.05 | GSR       | 1.84 | 0.01 | ME2       | 1.7 | 0.03 |
| CALU     | 2.33 | 0.02 | GPATCH2    | 2.28 | 0.04 | SEMA3F    | 1.84 | 0.04 | MAOA      | 1.7 | 0.02 |
| MTRF1    | 2.33 | 0.05 | C1GALT1C   | 2.28 | 0.02 | LOC57228  | 1.83 | 0.02 | RG511     | 1.7 | 0.03 |
| LMO4     | 2.33 | 0.04 | PIGV       | 2.28 | 0.04 | OVOL1     | 1.83 | 0.04 | SSH3      | 1.7 | 0.04 |
| MORC2    | 2.33 | 0.02 | FDX1       | 2.27 | 0.02 | SIRPA     | 1.83 | 0.05 | GNE       | 1.7 | 0.04 |
| EXOSC4   | 2.33 | 0.01 | VPS45      | 2.27 | 0.02 | CTNNA1    | 1.82 | 0.03 | DDX27     | 1.7 | 0.04 |
| SPOCK1   | 2.32 | 0.02 | PODXL      | 2.26 | 0.05 | DUSP9     | 1.82 | 0.03 | USP48     | 1.7 | 0.05 |
| HTATSF1  | 2.32 | 0.03 | LSM7       | 2.26 | 0.02 | RAN       | 1.82 | 0.03 | LOC644617 | 1.7 | 0.04 |
| TMC6     | 2.32 | 0.02 | LIN7A      | 2.26 | 0.02 | ALCAM     | 1.81 | 0.05 | NDUFS2    | 1.7 | 0.03 |
| MCPH1    | 2.32 | 0.02 | PRUNE      | 2.26 | 0.04 | RIPK4     | 1.81 | 0.02 | SNUPN     | 1.7 | 0.04 |
| MCF2L    | 2.32 | 0.03 | ZMYM1      | 2.26 | 0.04 | CD99      | 1.81 | 0.03 | VRK3      | 1.7 | 0.03 |
| EHBP1L1  | 2.32 | 0.03 | C6orf120   | 2.26 | 0.01 | EXT2      | 1.81 | 0.03 | CAMK2B    | 1.7 | 0.04 |
| CRKL     | 2.31 | 0.04 | UBA2       | 2.25 | 0.01 | HMOX1     | 1.81 | 0.05 | FH        | 1.7 | 0.01 |
| LHX6     | 2.31 | 0.02 | KLHL20     | 2.25 | 0.04 | LRRFIP1   | 1.81 | 0.01 | EIF1AX    | 1.7 | 0.05 |
| CAPZB    | 2.3  | 0.03 | PPM1E      | 2.25 | 0.05 | PALM      | 1.81 | 0.03 | NAG18     | 1.7 | 0.03 |
| SIKE     | 2.3  | 0.03 | MED13L     | 2.25 | 0.04 | B4GALT1   | 1.81 | 0.02 | PARVB     | 1.7 | 0.03 |
| IRS2     | 2.3  | 0.05 | MT1E       | 2.25 | 0.05 | CD24      | 1.8  | 0.01 | USP11     | 1.7 | 0.03 |
| TRAF3IP2 | 2.3  | 0.05 | RDH11      | 2.25 | 0.04 | HSF1      | 1.8  | 0.02 | USP21     | 1.7 | 0.02 |
| PTEN     | 2.3  | 0.02 | GLT8D1     | 2.25 | 0.02 | HK1       | 1.8  | 0.02 | DDX52     | 1.7 | 0.05 |
| NEDD9    | 2.29 | 0.03 | RP3-377H14 | 2.25 | 0.03 | HOXA9     | 1.8  | 0.03 | DEAF1     | 1.7 | 0.01 |
| FGFR1    | 2.29 | 0.03 | YY1        | 2.24 | 0.04 | NFIB      | 1.8  | 0.04 | H2AFX     | 1.7 | 0.01 |
| POMGNT1  | 2.29 | 0.02 | NEBL       | 2.24 | 0.05 | ITM2B     | 1.8  | 0.02 | HOXA11    | 1.7 | 0.04 |
| SLCO4A1  | 2.29 | 0.04 | SAP30      | 2.24 | 0.05 | MAST4     | 1.8  | 0.02 | C5orf23   | 1.7 | 0.05 |
| KLF4     | 2.29 | 0.05 | GTF2H5     | 2.24 | 0.04 | LGALS1    | 1.8  | 0.02 | LOC727942 | 1.7 | 0.05 |
| STOM     | 2.28 | 0.03 | TWIST1     | 2.24 | 0.03 | MAX       | 1.8  | 0.04 | PDE9A     | 1.7 | 0.05 |
| SKP2     | 2.28 | 0.01 | RNF6       | 2.23 | 0.04 | ARHGEF10  | 1.8  | 0.03 | PLS1      | 1.7 | 0.03 |



|          |      |      |           |      |      |          |      |      |             |     |      |
|----------|------|------|-----------|------|------|----------|------|------|-------------|-----|------|
| EIF4B    | 2.28 | 0.02 | GIT2      | 2.23 | 0.03 | FANCE    | 1.79 | 0.04 | STAU2       | 1.7 | 0.03 |
| TPD52    | 2.27 | 0.05 | ARHGAP6   | 2.23 | 0.03 | STAT3    | 1.79 | 0.05 | CROT        | 1.7 | 0.04 |
| RXRA     | 2.27 | 0.03 | ALB       | 2.23 | 0.05 | FLJ20323 | 1.79 | 0.02 | DEDD        | 1.7 | 0.02 |
| GNS      | 2.27 | 0.01 | IVNS1ABP  | 2.22 | 0.01 | ITGA2    | 1.79 | 0.01 | SLC47A1     | 1.7 | 0.05 |
| CANX     | 2.27 | 0.01 | TIA1      | 2.22 | 0.03 | SH2D3A   | 1.79 | 0.03 | CCDC92      | 1.7 | 0.05 |
| NFYC     | 2.27 | 0.02 | NEBL      | 2.22 | 0.05 | SLC1A5   | 1.79 | 0.03 | SEPHS2      | 1.7 | 0.02 |
| TBC1D9B  | 2.27 | 0.05 | KIAA1279  | 2.22 | 0.04 | CTSB     | 1.78 | 0.04 | CDC20       | 1.7 | 0.02 |
| CAMK2N1  | 2.27 | 0.01 | C10orf137 | 2.22 | 0.03 | FAM53C   | 1.78 | 0.05 | DPH1 /// OV | 1.7 | 0.05 |
| ISOC2    | 2.27 | 0.02 | IQWD1     | 2.22 | 0.02 | JAM3     | 1.78 | 0.05 | WDR42A      | 1.7 | 0.03 |
| HK1      | 2.26 | 0.02 | AGPAT5    | 2.22 | 0.02 | LMNA     | 1.78 | 0.04 | KLHDC2      | 1.7 | 0.04 |
| HLA-E    | 2.26 | 0.03 | IER5      | 2.22 | 0.05 | LARS     | 1.78 | 0.03 | MAPK8IP2    | 1.7 | 0.03 |
| SLC20A2  | 2.26 | 0.02 | LARS2     | 2.22 | 0.04 | PFKP     | 1.78 | 0.01 | PXMP2       | 1.7 | 0.04 |
| CCDC85B  | 2.26 | 0.01 | GALE      | 2.21 | 0.02 | TUBA1A   | 1.78 | 0.05 | PTK2B       | 1.7 | 0.04 |
| ATG4B    | 2.26 | 0.01 | PRKCD     | 2.21 | 0.01 | ARL6IP5  | 1.78 | 0.02 | RAP1GDS1    | 1.7 | 0.03 |
| SLC36A1  | 2.26 | 0.02 | RBM12     | 2.21 | 0.03 | CTSB     | 1.77 | 0.02 | EZR         | 1.7 | 0.05 |
| WDR6     | 2.26 | 0.03 | PPM1B     | 2.21 | 0.03 | GPER     | 1.77 | 0.04 | TOR1AIP1    | 1.7 | 0.03 |
| RBM35A   | 2.26 | 0.02 | RPL18A    | 2.21 | 0.03 | MOSC2    | 1.77 | 0.05 | GTF3A       | 1.7 | 0.03 |
| HS2ST1   | 2.25 | 0.02 | DPEP3     | 2.21 | 0.04 | TINP1    | 1.77 | 0.01 | MGC5618     | 1.7 | 0.01 |
| ALDH4A1  | 2.25 | 0.04 | COPS8     | 2.2  | 0.04 | LDLR     | 1.77 | 0.04 | IARS2       | 1.7 | 0.05 |
| VDR      | 2.25 | 0.01 | PEX11B    | 2.2  | 0.03 | TTC33    | 1.77 | 0.03 | ME2         | 1.7 | 0.05 |
| MAX      | 2.25 | 0.03 | EID1      | 2.2  | 0.02 | SCMH1    | 1.77 | 0.03 | NPDC1       | 1.7 | 0.03 |
| TAPBP    | 2.25 | 0.02 | NOL7      | 2.2  | 0.01 | CSNK1A1  | 1.76 | 0.02 | TXNRD3      | 1.7 | 0.03 |
| ILVBL    | 2.25 | 0.03 | HGF       | 2.2  | 0.05 | CTNNA1   | 1.76 | 0.01 | TULP4       | 1.7 | 0.03 |
| C1orf116 | 2.25 | 0.03 | CYB5A     | 2.19 | 0.03 | PDLIM7   | 1.76 | 0.04 | TNFSF12-T   | 1.7 | 0.04 |
| C20orf27 | 2.25 | 0.02 | HIGD1A    | 2.19 | 0.04 | EPHB3    | 1.76 | 0.01 | ZNF672      | 1.7 | 0.05 |
| ECE1     | 2.24 | 0.04 | SNAP25    | 2.18 | 0.02 | SKP2     | 1.76 | 0.01 | METRNL      | 1.7 | 0.03 |
| PTPN21   | 2.24 | 0.04 | UTX       | 2.18 | 0.05 | POLB     | 1.76 | 0.01 | LIG3        | 1.7 | 0.03 |
| SYT17    | 2.24 | 0.04 | HTATIP2   | 2.18 | 0.03 | SCAMP1   | 1.76 | 0.02 | HMHA1       | 1.7 | 0.04 |
| ATP11A   | 2.24 | 0.03 | MCCC2     | 2.18 | 0.03 | DDX3Y    | 1.75 | 0.04 | NOVA1       | 1.7 | 0.05 |
| CAMLG    | 2.23 | 0.01 | DNAJC9    | 2.18 | 0.05 | GRK6     | 1.75 | 0.04 | UBE2Q1      | 1.7 | 0.01 |
| SCGB1D2  | 2.23 | 0.02 | CKAP2     | 2.18 | 0.04 | HPCAL1   | 1.75 | 0.03 | SEC24C      | 1.7 | 0.03 |
| PNRC1    | 2.23 | 0.02 | U2AF2     | 2.18 | 0.05 | MXD4     | 1.75 | 0.05 | VCX /// VCX | 1.7 | 0.05 |
| HLA-G    | 2.23 | 0.04 | PPP1R9A   | 2.18 | 0.01 | DNASE2   | 1.74 | 0.01 | R3HDM2      | 1.6 | 0.04 |
| SEC31A   | 2.23 | 0.01 | ATF1      | 2.18 | 0.03 | FNBP1    | 1.74 | 0.02 | ECHDC3      | 1.6 | 0.03 |
| DLL3     | 2.23 | 0.04 | RFK       | 2.17 | 0.04 | GDI2     | 1.74 | 0.01 | ADCK2       | 1.6 | 0.03 |
| LEPRE1   | 2.23 | 0.04 | DENR      | 2.17 | 0.04 | HPCAL1   | 1.74 | 0.01 | MON2        | 1.6 | 0.05 |
| LPCAT1   | 2.22 | 0.02 | PPP1R12A  | 2.16 | 0.05 | LRRFIP1  | 1.74 | 0.05 | LBR         | 1.6 | 0.04 |

|          |      |      |             |      |      |          |      |      |             |     |      |
|----------|------|------|-------------|------|------|----------|------|------|-------------|-----|------|
| SRPX     | 2.22 | 0.05 | FH          | 2.16 | 0.01 | SH3YL1   | 1.74 | 0.04 | MRPL9       | 1.6 | 0.03 |
| NAB1     | 2.22 | 0.05 | CUL5        | 2.16 | 0.03 | MCAM     | 1.74 | 0.04 | PVRL3       | 1.6 | 0.03 |
| UBE2I    | 2.22 | 0.01 | UCHL5       | 2.16 | 0.04 | NOV      | 1.74 | 0.03 | PRKACB      | 1.6 | 0.04 |
| CABIN1   | 2.22 | 0.01 | ATG5        | 2.15 | 0.02 | RNASET2  | 1.74 | 0.05 | PTPN18      | 1.6 | 0.04 |
| IQGAP1   | 2.21 | 0.02 | DMXL1       | 2.15 | 0.05 | RNASET2  | 1.74 | 0.05 | RUVBL1      | 1.6 | 0.03 |
| HSF1     | 2.21 | 0.03 | DYNLT1      | 2.14 | 0.01 | ZFAND5   | 1.74 | 0.04 | NENF        | 1.6 | 0.04 |
| ITGA6    | 2.21 | 0.03 | TXNL4A      | 2.14 | 0.03 | PDXK     | 1.73 | 0.05 | UMPS        | 1.6 | 0.02 |
| PARP12   | 2.21 | 0.01 | NVL         | 2.14 | 0.02 | TBC1D22A | 1.73 | 0.02 | AK2         | 1.6 | 0.04 |
| FLJ20035 | 2.21 | 0.02 | C6orf62     | 2.14 | 0.04 | MLLT3    | 1.73 | 0.05 | SETD4       | 1.6 | 0.05 |
| STK11    | 2.21 | 0.04 | RNF5        | 2.14 | 0.02 | SPTBN1   | 1.73 | 0.05 | EID1        | 1.6 | 0.05 |
| CDH1     | 2.2  | 0.05 | CETN3       | 2.14 | 0.01 | XRCC3    | 1.73 | 0.04 | FAM63A      | 1.6 | 0.05 |
| MAX      | 2.2  | 0.03 | RAB6B       | 2.14 | 0.03 | NT5C2    | 1.72 | 0.03 | ICMT        | 1.6 | 0.03 |
| LPIN1    | 2.2  | 0.04 | HNRPH3      | 2.13 | 0.01 | EXOC7    | 1.72 | 0.02 | MBD5        | 1.6 | 0.02 |
| TMEM194  | 2.2  | 0.04 | CACYBP      | 2.13 | 0.04 | SCAMP1   | 1.72 | 0.01 | NEDD4L      | 1.6 | 0.05 |
| MYCL1    | 2.2  | 0.02 | SLC47A1     | 2.13 | 0.04 | EHD1     | 1.71 | 0.03 | PDHB        | 1.6 | 0.04 |
| MYST3    | 2.2  | 0.03 | DET1        | 2.13 | 0.05 | EXOSC4   | 1.71 | 0.02 | GBA /// GBA | 1.6 | 0.05 |
| GDI2     | 2.19 | 0.04 | FLJ22167    | 2.13 | 0.02 | CREB3L2  | 1.71 | 0.02 | DENND4B     | 1.6 | 0.05 |
| RERE     | 2.19 | 0.04 | TLK1        | 2.12 | 0.01 | DCC1     | 1.71 | 0.04 | ARNT        | 1.6 | 0.05 |
| SMARCC1  | 2.19 | 0.05 | WRB         | 2.12 | 0.02 | CD24     | 1.71 | 0.01 | ATP6V1B2    | 1.6 | 0.02 |
| BNIP3    | 2.19 | 0.04 | LILRA6      | 2.12 | 0.03 | PALLD    | 1.71 | 0.03 | CHD1L       | 1.6 | 0.03 |
| NAGA     | 2.19 | 0.03 | ISCU        | 2.12 | 0.03 | LMF1     | 1.7  | 0.02 | C14orf94    | 1.6 | 0.04 |
| PTPN4    | 2.19 | 0.03 | FEM1B       | 2.12 | 0.02 | SCPEP1   | 1.7  | 0.05 | ECHS1       | 1.6 | 0.03 |
| CTDSP2   | 2.19 | 0.02 | TRA         | 2.12 | 0.05 | ST6GALNA | 1.7  | 0.05 | DEPDC1      | 1.6 | 0.04 |
| IQGAP1   | 2.19 | 0.04 | FLJ32679 // | 2.11 | 0.04 | SNCB     | 1.7  | 0.03 | MRP63       | 1.6 | 0.04 |
| GGA2     | 2.19 | 0.04 | GAL         | 2.11 | 0.05 | UBE2B    | 1.7  | 0.04 | MAPK8IP2    | 1.6 | 0.04 |
| CLIC4    | 2.19 | 0.03 | KIF15       | 2.11 | 0.03 | CAMLG    | 1.69 | 0.04 | NRXN1       | 1.6 | 0.03 |
| RRBP1    | 2.18 | 0.02 | TMEM118     | 2.11 | 0.02 | CTBP2    | 1.69 | 0.03 | PARVB       | 1.6 | 0.05 |
| IFI30    | 2.18 | 0.03 | RFC2        | 2.1  | 0.03 | DNASE2   | 1.69 | 0.05 | JARID1B     | 1.6 | 0.04 |
| PABPN1   | 2.18 | 0.03 | DHX9        | 2.1  | 0.01 | RIBC2    | 1.69 | 0.04 | SLC29A1     | 1.6 | 0.03 |
| B4GALT1  | 2.18 | 0.04 | NELL2       | 2.1  | 0.03 | GALNS    | 1.69 | 0.03 | TRIM32      | 1.6 | 0.04 |
| IGSF3    | 2.18 | 0.03 | UBA3        | 2.1  | 0.03 | GLA      | 1.69 | 0.03 | YLPM1       | 1.6 | 0.03 |
| C9orf16  | 2.18 | 0.04 | HERC6       | 2.1  | 0.04 | GLG1     | 1.69 | 0.03 | ADAR        | 1.6 | 0.02 |
| HGS      | 2.18 | 0.02 | CASP3       | 2.09 | 0.02 | LMNA     | 1.69 | 0.04 | MTX1        | 1.6 | 0.04 |
| EXTL3    | 2.18 | 0.03 | OXCT1       | 2.09 | 0.01 | LRRFIP1  | 1.69 | 0.02 | ASAH1       | 1.6 | 0.05 |
| MYO1B    | 2.18 | 0.02 | EMG1        | 2.09 | 0.03 | MEF2A    | 1.69 | 0.05 | RAD51L3     | 1.6 | 0.05 |
| MCF2L    | 2.18 | 0.04 | PSEN2       | 2.09 | 0.03 | NCKAP1   | 1.69 | 0.01 | RTN3        | 1.6 | 0.04 |
| APBB2    | 2.18 | 0.03 | WDTC1       | 2.09 | 0.04 | NFATC1   | 1.69 | 0.04 | TXNRD1      | 1.6 | 0.05 |

|          |      |      |             |      |      |              |      |      |             |     |      |
|----------|------|------|-------------|------|------|--------------|------|------|-------------|-----|------|
| BAMBI    | 2.17 | 0.01 | MRS2L       | 2.09 | 0.02 | UBE2B        | 1.69 | 0.02 | FDPS        | 1.6 | 0.04 |
| HS1BP3   | 2.17 | 0.04 | RBKS        | 2.09 | 0.03 | ABAT         | 1.68 | 0.05 | CHD8        | 1.6 | 0.05 |
| TEAD4    | 2.17 | 0.05 | TXNDC13     | 2.08 | 0.02 | DAP          | 1.68 | 0.04 | LRRC61      | 1.6 | 0.04 |
| CD99     | 2.16 | 0.03 | CDC7        | 2.08 | 0.04 | DPYSL4       | 1.68 | 0.03 | JAG2        | 1.6 | 0.04 |
| CLPTM1   | 2.16 | 0.05 | DOPEY1      | 2.08 | 0.04 | FEM1C        | 1.68 | 0.01 | SLC25A37    | 1.6 | 0.05 |
| GSTT1    | 2.16 | 0.01 | GTF3A       | 2.05 | 0.02 | LDHA         | 1.68 | 0.03 | APEH        | 1.6 | 0.05 |
| HK2      | 2.15 | 0.01 | TIMP1       | 2.05 | 0.01 | LOH11CR2A    | 1.68 | 0.04 | NAPA        | 1.6 | 0.02 |
| CSNK1A1  | 2.15 | 0.02 | MUT         | 2.05 | 0.04 | RBPMS        | 1.68 | 0.02 | NUP133      | 1.6 | 0.02 |
| MRPL35   | 2.15 | 0.04 | PLA2G6      | 2.05 | 0.03 | CALM1        | 1.67 | 0.01 | BSCL2 /// H | 1.6 | 0.03 |
| AKR1A1   | 2.14 | 0.01 | PRB1 /// PR | 2.05 | 0.04 | CSNK1A1      | 1.67 | 0.05 | COX4I1      | 1.6 | 0.05 |
| DDX11    | 2.14 | 0.01 | ZNF160      | 2.05 | 0.02 | SHFM1        | 1.67 | 0.05 | RSAD1       | 1.6 | 0.04 |
| REEP5    | 2.14 | 0.04 | APPL1       | 2.05 | 0.03 | DYRK3        | 1.67 | 0.02 | RMI1        | 1.6 | 0.04 |
| NCOA1    | 2.14 | 0.02 | NCAPG       | 2.05 | 0.03 | EEF1D /// EE | 1.67 | 0.02 | FCHO1       | 1.6 | 0.04 |
| XRCC3    | 2.14 | 0.02 | C17orf42    | 2.05 | 0.02 | KIAA0247     | 1.67 | 0.05 | PNPLA6      | 1.6 | 0.05 |
| IGHM     | 2.14 | 0.05 | ACTR3       | 2.04 | 0.03 | PERP         | 1.67 | 0.04 | PATZ1       | 1.6 | 0.04 |
| PTPRF    | 2.13 | 0.03 | TIA1        | 2.04 | 0.02 | PSMA6        | 1.67 | 0.02 | POMP        | 1.6 | 0.02 |
| PSAP     | 2.13 | 0.03 | PRPS2       | 2.04 | 0.05 | SLC1A4       | 1.67 | 0.03 | MPZL1       | 1.6 | 0.03 |
| CHP      | 2.13 | 0.05 | CDKN2C      | 2.04 | 0.04 | LRP12        | 1.67 | 0.04 | KIAA0100    | 1.6 | 0.05 |
| TXNDC1   | 2.13 | 0.04 | PMAIP1      | 2.04 | 0.02 | VAMP3        | 1.67 | 0.05 | LARP5       | 1.6 | 0.02 |
| 8-Sep    | 2.13 | 0.03 | BLVRA       | 2.04 | 0.01 | AKR1A1       | 1.66 | 0.01 | PI4KB       | 1.6 | 0.03 |
| EHD1     | 2.13 | 0.02 | FOLH1       | 2.04 | 0.03 | BAK1         | 1.66 | 0.02 | AIFM1       | 1.6 | 0.04 |
| DCTN5    | 2.13 | 0.05 | NFYB        | 2.04 | 0.04 | ENO1         | 1.66 | 0.02 | PPP1R14B    | 1.6 | 0.03 |
| SLC1A4   | 2.13 | 0.04 | CHMP2A      | 2.03 | 0.02 | RAB15        | 1.66 | 0.01 | REPIN1      | 1.6 | 0.04 |
| FOXO3    | 2.13 | 0.03 | CEP57       | 2.03 | 0.05 | JARID2       | 1.66 | 0.02 | RBM8A       | 1.6 | 0.04 |
| LARGE    | 2.13 | 0.04 | C1orf25     | 2.03 | 0.04 | PGD          | 1.66 | 0.02 | NEK7        | 1.6 | 0.05 |
| FNDC4    | 2.13 | 0.02 | C5orf30     | 2.03 | 0.05 | RB1CC1       | 1.66 | 0.02 | OCRL        | 1.6 | 0.03 |
| ITM2C    | 2.13 | 0.05 | NPEPPS      | 2.02 | 0.01 | AHCYL1       | 1.66 | 0.03 | PAXIP1      | 1.6 | 0.04 |
| SLC6A8   | 2.12 | 0.02 | SACM1L      | 2.02 | 0.05 | SH3BGRL3     | 1.66 | 0.04 | THOC2       | 1.6 | 0.03 |
| LAD1     | 2.12 | 0.02 | SLK         | 2.02 | 0.05 | SDCBP        | 1.66 | 0.03 | WBSCR16     | 1.6 | 0.03 |
| DBI      | 2.12 | 0.04 | MTUS1       | 2.02 | 0.04 | ZFP36L2      | 1.66 | 0.01 | ATP6AP2     | 1.6 | 0.05 |
| MXRA7    | 2.12 | 0.03 | NDUFA7      | 2.01 | 0.02 | AGPAT2       | 1.65 | 0.05 | PTPN18      | 1.6 | 0.05 |
| KIAA0495 | 2.12 | 0.02 | BCAT2       | 2.01 | 0.01 | DNPEP        | 1.65 | 0.01 | RAD23A      | 1.6 | 0.05 |
| FXYD3    | 2.11 | 0.01 | ZBTB20      | 2.01 | 0.04 | CALU         | 1.65 | 0.05 | ARIH2       | 1.5 | 0.04 |
| TFAP2C   | 2.11 | 0.04 | NENF        | 2.01 | 0.03 | DNAJB9       | 1.65 | 0.04 | C6orf35     | 1.5 | 0.04 |
| ALDH7A1  | 2.11 | 0.03 | NAT13       | 2.01 | 0.05 | HES1         | 1.65 | 0.04 | DDX27       | 1.5 | 0.04 |
| ILF3     | 2.11 | 0.03 | AGK         | 2.01 | 0.03 | ITPR3        | 1.65 | 0.03 | H2AFZ       | 1.5 | 0.03 |
| SMYD2    | 2.11 | 0.04 | CDC73       | 2.01 | 0.03 | INSIG1       | 1.65 | 0.02 | GOLPH3L     | 1.5 | 0.05 |

|          |      |      |          |      |      |           |      |      |             |     |      |
|----------|------|------|----------|------|------|-----------|------|------|-------------|-----|------|
| PPP1R15A | 2.11 | 0.02 | ABCA11   | 2.01 | 0.03 | IFNGR1    | 1.65 | 0.05 | ZNF586      | 1.5 | 0.05 |
| PIK3R3   | 2.1  | 0.01 | MRPL20   | 2.01 | 0.02 | ISG20     | 1.65 | 0.03 | JAG2        | 1.5 | 0.02 |
| FGFR2    | 2.1  | 0.03 | H3F3A    | 2    | 0.02 | LANCL2    | 1.65 | 0.05 | TMEM24      | 1.5 | 0.03 |
| CFD      | 2.1  | 0.01 | SLC30A9  | 2    | 0.05 | MACF1     | 1.65 | 0.02 | MYO5C       | 1.5 | 0.05 |
| P4HA1    | 2.1  | 0.02 | TMEM28   | 2    | 0.03 | RAD1      | 1.65 | 0.03 | RRM2        | 1.5 | 0.02 |
| APLP2    | 2.1  | 0.05 | KIAA0368 | 2    | 0.03 | TSPAN4    | 1.65 | 0.02 | POLR3E      | 1.5 | 0.03 |
| SSBP2    | 2.1  | 0.03 | CDC2L6   | 2    | 0.02 | AMH       | 1.64 | 0.04 | SEC11A      | 1.5 | 0.05 |
| CTNNA1   | 2.1  | 0.05 | MSTP9    | 2    | 0.03 | TPP1      | 1.64 | 0.04 | CCNH        | 1.5 | 0.04 |
| YIPF1    | 2.1  | 0.04 | TNFRSF21 | 2    | 0.02 | GGCX      | 1.64 | 0.03 | SCYL3       | 1.5 | 0.04 |
| NPLOC4   | 2.1  | 0.01 | ZNF14    | 2    | 0.02 | MPST      | 1.64 | 0.02 | KLHL22      | 1.5 | 0.02 |
| CSK      | 2.09 | 0.03 | PDE4C    | 1.99 | 0.02 | GNPTAB    | 1.64 | 0.02 | C9orf95     | 1.5 | 0.05 |
| HSPA4    | 2.09 | 0.04 | PDE6B    | 1.99 | 0.04 | RASA1     | 1.64 | 0.03 | MPDU1       | 1.5 | 0.05 |
| UCP2     | 2.09 | 0.02 | POMP     | 1.99 | 0.03 | ACCN2     | 1.63 | 0.05 | PSME3       | 1.5 | 0.05 |
| TYRO3    | 2.09 | 0.02 | ARIH1    | 1.98 | 0.03 | DST       | 1.63 | 0.05 | VRK3        | 1.5 | 0.05 |
| MINK1    | 2.09 | 0.02 | ZNF268   | 1.98 | 0.03 | CSNK1A1   | 1.63 | 0.01 | KCTD14      | 1.5 | 0.04 |
| MTMR12   | 2.09 | 0.04 | SIAH1    | 1.97 | 0.02 | CD164     | 1.63 | 0.01 | IMPDH2      | 1.5 | 0.02 |
| TBL1X    | 2.08 | 0.02 | C3orf60  | 1.97 | 0.01 | CD9       | 1.63 | 0.03 | INPP1       | 1.5 | 0.05 |
| UNC119   | 2.08 | 0.02 | KLHL9    | 1.97 | 0.03 | MXN1      | 1.63 | 0.05 | PTN         | 1.5 | 0.04 |
| MBNL2    | 2.08 | 0.03 | SERHL2   | 1.97 | 0.01 | EIF2C2    | 1.63 | 0.04 | PRSS23      | 1.5 | 0.04 |
| BCKDHB   | 2.08 | 0.05 | C15orf24 | 1.97 | 0.02 | MEIS2     | 1.63 | 0.05 | PSME3       | 1.5 | 0.02 |
| AHNAK    | 2.08 | 0.02 | WDR61    | 1.97 | 0.05 | CALM1     | 1.62 | 0.02 | RABAC1      | 1.5 | 0.05 |
| TSC22D1  | 2.08 | 0.02 | GUCY1A3  | 1.97 | 0.05 | GDI2      | 1.62 | 0.02 | ASF1A       | 1.5 | 0.04 |
| PRRC1    | 2.08 | 0.03 | MPO      | 1.96 | 0.04 | CTDSPL    | 1.62 | 0.01 | PTPLAD1     | 1.5 | 0.03 |
| CYR61    | 2.07 | 0.03 | UBR5     | 1.96 | 0.03 | TMEM97    | 1.62 | 0.03 | CKS1B       | 1.5 | 0.04 |
| PHGDH    | 2.07 | 0.01 | HSD17B8  | 1.96 | 0.04 | PCDHA1    | 1.62 | 0.04 | E4F1        | 1.5 | 0.05 |
| JUNB     | 2.07 | 0.04 | MLH3     | 1.96 | 0.03 | SAR1A     | 1.62 | 0.01 | GTF3C4      | 1.5 | 0.04 |
| F12      | 2.07 | 0.03 | ZNF586   | 1.96 | 0.04 | TEAD4     | 1.62 | 0.02 | GYG1        | 1.5 | 0.05 |
| GRK6     | 2.07 | 0.01 | ETFDH    | 1.96 | 0.03 | TNFRSF10B | 1.62 | 0.03 | CXorf40A // | 1.5 | 0.05 |
| TSC2     | 2.07 | 0.05 | LASP1    | 1.95 | 0.04 | WEE1      | 1.62 | 0.05 | KIAA0101    | 1.5 | 0.04 |
| FAM53C   | 2.07 | 0.01 | CHUK     | 1.95 | 0.05 | COPS5     | 1.61 | 0.04 | SERHL       | 1.5 | 0.02 |
| TSPAN12  | 2.07 | 0.03 | HTATIP2  | 1.95 | 0.04 | GM2A      | 1.61 | 0.04 | BCAT2       | 1.5 | 0.04 |
| C19orf22 | 2.07 | 0.04 | RALGPS1  | 1.95 | 0.05 | CCDC99    | 1.61 | 0.03 | CKMT1A ///  | 1.5 | 0.03 |
| NBL1     | 2.06 | 0.04 | NF1      | 1.95 | 0.05 | KLHL21    | 1.61 | 0.02 | ARPP-19     | 1.5 | 0.05 |
| ARFGEF1  | 2.06 | 0.05 | HES1     | 1.94 | 0.04 | PFDN1     | 1.61 | 0.04 | ISG20L2     | 1.5 | 0.04 |
| PTRF     | 2.06 | 0.03 | FAM136A  | 1.94 | 0.04 | PTPLA     | 1.61 | 0.05 | NEK3        | 1.5 | 0.05 |
| LASS6    | 2.06 | 0.01 | CECR5    | 1.94 | 0.04 | C11orf67  | 1.61 | 0.05 | PSMB4       | 1.5 | 0.02 |
| BOP1     | 2.06 | 0.04 | ATG3     | 1.94 | 0.02 | THEM2     | 1.61 | 0.03 | PRC1        | 1.5 | 0.04 |

|          |      |      |             |      |      |          |      |      |          |     |      |
|----------|------|------|-------------|------|------|----------|------|------|----------|-----|------|
| PITPNC1  | 2.06 | 0.03 | HSPA5       | 1.93 | 0.02 | AGPAT2   | 1.6  | 0.04 | JARID1B  | 1.5 | 0.04 |
| SLC2A6   | 2.06 | 0.05 | CAMSAP1     | 1.93 | 0.03 | HMGCR    | 1.6  | 0.03 | RBM3     | 1.5 | 0.05 |
| RIPK4    | 2.06 | 0.03 | LOC727942   | 1.93 | 0.02 | ATF3     | 1.6  | 0.01 | SEC11A   | 1.5 | 0.04 |
| MGAT2    | 2.05 | 0.02 | IL15        | 1.93 | 0.04 | ERGIC2   | 1.6  | 0.03 | SRM      | 1.5 | 0.03 |
| GGCX     | 2.05 | 0.03 | DUS1L       | 1.93 | 0.02 | TBC1D9B  | 1.6  | 0.04 | TAF6     | 1.5 | 0.04 |
| ABAT     | 2.05 | 0.02 | NENF        | 1.93 | 0.05 | TAF7     | 1.6  | 0.05 | ASPA     | 1.5 | 0.04 |
| ACLY     | 2.05 | 0.04 | PSMG1       | 1.92 | 0.03 | TARS     | 1.6  | 0.04 | SLC37A4  | 1.5 | 0.05 |
| NFIB     | 2.05 | 0.05 | NUCB2       | 1.92 | 0.03 | SLC35D1  | 1.6  | 0.05 | MST1R    | 1.5 | 0.04 |
| DDAH2    | 2.05 | 0.05 | KPNA2       | 1.92 | 0.05 | YPEL5    | 1.6  | 0.04 | PTGIS    | 1.5 | 0.03 |
| MOSC2    | 2.05 | 0.02 | Gcom1 /// G | 1.92 | 0.02 | FKBP9    | 1.59 | 0.02 | NENF     | 1.5 | 0.05 |
| ACTR1A   | 2.04 | 0.02 | GADD45GI    | 1.92 | 0.04 | HS2ST1   | 1.59 | 0.05 | CACYBP   | 1.5 | 0.02 |
| CHST3    | 2.04 | 0.02 | FBXL14      | 1.92 | 0.05 | FAM102A  | 1.59 | 0.05 | AP2A2    | 1.5 | 0.05 |
| CSNK1A1  | 2.04 | 0.05 | FBXO5       | 1.92 | 0.05 | NOSIP    | 1.59 | 0.03 | C20orf67 | 1.5 | 0.03 |
| HES2     | 2.04 | 0.04 | RUVBL1      | 1.91 | 0.01 | PIK3C2B  | 1.59 | 0.05 | C21orf33 | 1.5 | 0.03 |
| WWC2     | 2.04 | 0.02 | SLC25A13    | 1.91 | 0.03 | MAFF     | 1.59 | 0.04 | FADS1    | 1.5 | 0.04 |
| RAB15    | 2.04 | 0.01 | KIF11       | 1.91 | 0.03 | ADH5     | 1.58 | 0.03 | H2AFZ    | 1.5 | 0.05 |
| DHCR7    | 2.03 | 0.03 | RAD1        | 1.91 | 0.03 | CANX     | 1.58 | 0.01 | BAT3     | 1.5 | 0.04 |
| FEM1C    | 2.03 | 0.05 | JMJD6       | 1.91 | 0.03 | GTF2IRD1 | 1.58 | 0.02 | FLJ22167 | 1.5 | 0.05 |
| COBLL1   | 2.03 | 0.05 | KIAA0564    | 1.91 | 0.01 | REEP5    | 1.58 | 0.02 | RDH11    | 1.5 | 0.04 |
| TLE2     | 2.02 | 0.02 | C1orf107    | 1.91 | 0.02 | MLXIP    | 1.58 | 0.05 | TERF2IP  | 1.5 | 0.05 |
| VDAC3    | 2.02 | 0.04 | FAM149A     | 1.91 | 0.05 | NFYC     | 1.58 | 0.02 | PATZ1    | 1.5 | 0.05 |
| AFF4     | 2.02 | 0.04 | CRYL1       | 1.91 | 0.03 | NPM1     | 1.58 | 0.02 | ATP1A1   | 1.5 | 0.02 |
| SEMA4C   | 2.02 | 0.03 | EIF5B       | 1.9  | 0.05 | OAZ2     | 1.58 | 0.02 | GAL3ST1  | 1.5 | 0.04 |
| PKM2     | 2.01 | 0.05 | PSMA2       | 1.9  | 0.04 | SLC7A5   | 1.58 | 0.02 | PIGV     | 1.5 | 0.02 |
| AIM1     | 2.01 | 0.05 | FBXO28      | 1.9  | 0.05 | SKP2     | 1.58 | 0.04 | TXNDC13  | 1.5 | 0.05 |
| APBA3    | 2.01 | 0.04 | BLVRA       | 1.9  | 0.02 | TUBB6    | 1.58 | 0.01 | CLCC1    | 1.5 | 0.05 |
| GSTK1    | 2.01 | 0.04 | NEB         | 1.9  | 0.04 | LMAN2    | 1.57 | 0.04 | RFNG     | 1.5 | 0.05 |
| HSPC159  | 2.01 | 0.03 | NRG2        | 1.9  | 0.02 | MCAM     | 1.57 | 0.01 | GNPAT    | 1.5 | 0.05 |
| C9orf16  | 2.01 | 0.02 | SMC3        | 1.89 | 0.03 | ILVBL    | 1.57 | 0.05 | COMMD4   | 1.5 | 0.05 |
| MPST     | 2    | 0.01 | C21orf45    | 1.89 | 0.04 | RAB26    | 1.57 | 0.02 | C7orf26  | 1.5 | 0.02 |
| SAR1A    | 2    | 0.04 | MAK10       | 1.89 | 0.03 | RGS14    | 1.57 | 0.03 | KEAP1    | 1.5 | 0.05 |
| MCAM     | 2    | 0.02 | TMEM118     | 1.89 | 0.02 | CALML4   | 1.57 | 0.03 | MMP24    | 1.5 | 0.05 |
| KIR2DS1  | 2    | 0.02 | NDC80       | 1.88 | 0.03 | CHST3    | 1.56 | 0.03 | PITPNA   | 1.5 | 0.05 |
| ATP13A3  | 2    | 0.03 | POT1        | 1.88 | 0.03 | GMDS     | 1.56 | 0.04 | POLR3K   | 1.5 | 0.03 |
| SLC9A3R1 | 1.99 | 0.04 | FEN1        | 1.88 | 0.03 | NFYC     | 1.56 | 0.01 | C6orf108 | 1.5 | 0.02 |
| DBI      | 1.99 | 0.04 | TLOC1       | 1.88 | 0.03 | SIRPA    | 1.56 | 0.05 | WDR61    | 1.5 | 0.04 |
| TRIM26   | 1.99 | 0.02 | LSM14A      | 1.88 | 0.02 | RCN3     | 1.56 | 0.04 | SCAP     | 1.5 | 0.05 |

|             |      |      |           |      |      |          |      |      |          |     |      |
|-------------|------|------|-----------|------|------|----------|------|------|----------|-----|------|
| BRD2        | 1.99 | 0.02 | ZNF26     | 1.88 | 0.05 | DDEFL1   | 1.56 | 0.05 | TOP2A    | 1.5 | 0.03 |
| ERBB2       | 1.99 | 0.03 | STXBP6    | 1.88 | 0.05 | VAMP3    | 1.56 | 0.05 | XYLB     | 1.5 | 0.03 |
| CDKN1C      | 1.99 | 0.04 | BRP44     | 1.87 | 0.03 | CLTB     | 1.55 | 0.05 | HECTD3   | 1.5 | 0.01 |
| C14orf1     | 1.99 | 0.04 | SNRPG     | 1.87 | 0.03 | DGKZ     | 1.55 | 0.02 | EHBP1    | 1.5 | 0.05 |
| TMBIM1      | 1.99 | 0.05 | TOP2B     | 1.87 | 0.05 | METTL7A  | 1.55 | 0.05 | HLA-DRB4 | 1.5 | 0.05 |
| FLJ13236    | 1.99 | 0.02 | JMJD6     | 1.87 | 0.04 | TMEM97   | 1.55 | 0.03 | NGFRAP1  | 1.5 | 0.04 |
| FGF12       | 1.98 | 0.05 | DICER1    | 1.87 | 0.04 | MAX      | 1.55 | 0.05 | OSBP     | 1.5 | 0.04 |
| GLT25D1     | 1.98 | 0.03 | LOC727942 | 1.87 | 0.04 | MRPS30   | 1.55 | 0.04 | PCBP1    | 1.5 | 0.02 |
| DERL1       | 1.98 | 0.05 | MORC4     | 1.87 | 0.04 | PYGB     | 1.55 | 0.04 | PLOD3    | 1.5 | 0.05 |
| EXOSC4      | 1.98 | 0.03 | CHPT1     | 1.87 | 0.05 | RABGAP1  | 1.55 | 0.04 | VPS72    | 1.5 | 0.04 |
| DNPEP       | 1.97 | 0.02 | LOC389517 | 1.87 | 0.05 | ABR      | 1.54 | 0.02 | GTPBP3   | 1.5 | 0.01 |
| GTF2F1      | 1.97 | 0.02 | CDC20     | 1.86 | 0.03 | EIF3E    | 1.54 | 0.02 |          |     |      |
| GPC1        | 1.97 | 0.01 | SNAPC3    | 1.86 | 0.01 | UBXD8    | 1.54 | 0.03 |          |     |      |
| TBC1D9B     | 1.97 | 0.01 | STAU2     | 1.86 | 0.04 | KIAA0746 | 1.54 | 0.03 |          |     |      |
| DYRK3       | 1.97 | 0.02 | FBXL5     | 1.86 | 0.02 | LYPLA2   | 1.54 | 0.03 |          |     |      |
| FKBP9       | 1.97 | 0.02 | AK2       | 1.86 | 0.04 | NPC2     | 1.54 | 0.04 |          |     |      |
| C14orf32    | 1.97 | 0.04 | TOR3A     | 1.86 | 0.05 | POLE3    | 1.54 | 0.03 |          |     |      |
| DDX3X       | 1.97 | 0.03 | SLC4A1AP  | 1.86 | 0.05 | ATP5SL   | 1.53 | 0.02 |          |     |      |
| CD9         | 1.96 | 0.02 | BOLA1     | 1.86 | 0.02 | LASS4    | 1.53 | 0.05 |          |     |      |
| TRAM1       | 1.96 | 0.02 | PLA2G2F   | 1.86 | 0.02 | GINS4    | 1.53 | 0.04 |          |     |      |
| FAM53B      | 1.96 | 0.03 | WASF3     | 1.85 | 0.04 | CEP68    | 1.53 | 0.05 |          |     |      |
| NCK2        | 1.96 | 0.01 | FAM115A   | 1.85 | 0.05 | NDUFA8   | 1.53 | 0.04 |          |     |      |
| NUDT4 /// N | 1.96 | 0.04 | H2AFX     | 1.85 | 0.03 | OSTF1    | 1.53 | 0.05 |          |     |      |
| GM2A        | 1.96 | 0.03 | PRKD1     | 1.85 | 0.04 | SARS     | 1.53 | 0.01 |          |     |      |
| CNOT8       | 1.95 | 0.03 | ZNF673    | 1.85 | 0.04 | SLC4A3   | 1.53 | 0.04 |          |     |      |
| CABIN1      | 1.95 | 0.01 | STX12     | 1.85 | 0.03 | SATB1    | 1.53 | 0.05 |          |     |      |
| SLC11A2     | 1.95 | 0.04 | SUCLG2    | 1.85 | 0.03 | SDC3     | 1.53 | 0.04 |          |     |      |
| RCC1 /// SN | 1.95 | 0.02 | MED4      | 1.85 | 0.04 | TCF3     | 1.53 | 0.03 |          |     |      |
| PXN         | 1.95 | 0.04 | DARS2     | 1.85 | 0.03 | VAMP3    | 1.53 | 0.03 |          |     |      |
| GRINA       | 1.95 | 0.02 | ADAT1     | 1.85 | 0.04 | ATP6V0E1 | 1.52 | 0.03 |          |     |      |
| BOP1 /// LO | 1.95 | 0.04 | GDF15     | 1.85 | 0.02 | CDC23    | 1.52 | 0.04 |          |     |      |
| TMEM132A    | 1.95 | 0.04 | VBP1      | 1.84 | 0.02 | C9orf16  | 1.52 | 0.05 |          |     |      |
| CDKN1C      | 1.95 | 0.03 | SSX2IP    | 1.84 | 0.04 | IL6ST    | 1.52 | 0.03 |          |     |      |
| PRNP        | 1.94 | 0.05 | C5        | 1.84 | 0.04 | RIOK2    | 1.52 | 0.04 |          |     |      |
| PRCP        | 1.94 | 0.03 | MRPL3     | 1.84 | 0.03 | GOLSYN   | 1.52 | 0.04 |          |     |      |
| NAGA        | 1.94 | 0.04 | ITPA      | 1.84 | 0.04 | LDLR     | 1.52 | 0.02 |          |     |      |
| PI4K2A      | 1.94 | 0.04 | ANXA7     | 1.84 | 0.04 | SLC25A32 | 1.52 | 0.03 |          |     |      |

|          |      |      |              |      |      |             |      |      |
|----------|------|------|--------------|------|------|-------------|------|------|
| SLC6A8   | 1.94 | 0.02 | C1orf34      | 1.84 | 0.03 | MLLT3       | 1.52 | 0.05 |
| TAGLN2   | 1.94 | 0.03 | YLPM1        | 1.84 | 0.05 | RALBP1      | 1.52 | 0.03 |
| GALNS    | 1.93 | 0.05 | DNAJC16      | 1.84 | 0.03 | SRD5A1      | 1.52 | 0.02 |
| NKX2-5   | 1.93 | 0.04 | SP3          | 1.84 | 0.05 | CTSH        | 1.51 | 0.04 |
| VAMP3    | 1.93 | 0.03 | PDE4DIP      | 1.84 | 0.04 | CIDEB       | 1.51 | 0.05 |
| BUB1     | 1.93 | 0.05 | OR7E37P      | 1.84 | 0.02 | CDC25C      | 1.51 | 0.05 |
| HNRNPU   | 1.93 | 0.03 | WDR5B        | 1.84 | 0.03 | DDB2        | 1.51 | 0.05 |
| C16orf57 | 1.93 | 0.01 | ZNF764       | 1.84 | 0.03 | EXOSC4      | 1.51 | 0.01 |
| ANKRD5   | 1.93 | 0.05 | EPRS         | 1.83 | 0.05 | GSTA3       | 1.51 | 0.03 |
| ARVCF    | 1.92 | 0.05 | SFRS10       | 1.83 | 0.03 | KIAA0323    | 1.51 | 0.03 |
| NR5A2    | 1.92 | 0.05 | BNIP1        | 1.83 | 0.04 | MTA1        | 1.51 | 0.03 |
| CANX     | 1.92 | 0.01 | PRUNE        | 1.83 | 0.05 | MTA1        | 1.51 | 0.04 |
| TRIM27   | 1.92 | 0.04 | C9orf95      | 1.83 | 0.04 | RAB9A       | 1.51 | 0.04 |
| CDK7     | 1.92 | 0.04 | RAD23A       | 1.82 | 0.02 | TPBG        | 1.51 | 0.04 |
| ZNF289   | 1.92 | 0.03 | ICMT         | 1.82 | 0.03 | CAMK2G      | 1.5  | 0.04 |
| TBC1D9B  | 1.92 | 0.03 | CRELD2       | 1.82 | 0.03 | C20orf111   | 1.5  | 0.03 |
| OTUB1    | 1.91 | 0.03 | SLC25A15     | 1.82 | 0.05 | DKFZp547E   | 1.5  | 0.05 |
| TBL1X    | 1.91 | 0.02 | SCML1        | 1.82 | 0.03 | LCP1        | 1.5  | 0.04 |
| CCT2     | 1.91 | 0.04 | IGF2BP2      | 1.82 | 0.04 | PDCD4       | 1.5  | 0.03 |
| FKBP1A   | 1.91 | 0.03 | BBS10        | 1.82 | 0.03 | PPP1R13B    | 1.5  | 0.04 |
| DBI      | 1.91 | 0.04 | RPS25        | 1.81 | 0.05 | C11orf67    | 1.5  | 0.04 |
| AHNAK    | 1.91 | 0.03 | CNIH         | 1.81 | 0.04 | SERPINH1    | 1.5  | 0.05 |
| CPD      | 1.9  | 0.04 | CNOT8        | 1.81 | 0.05 | SSX2 /// SS | 1.5  | 0.02 |
| SLC16A1  | 1.9  | 0.03 | RFC2         | 1.81 | 0.04 | TPD52       | 1.5  | 0.03 |
| DDX19A   | 1.9  | 0.03 | SNAP91       | 1.81 | 0.04 | ANXA4       | 1.49 | 0.05 |
| NFRKB    | 1.9  | 0.03 | PARP1        | 1.81 | 0.01 | BTG2        | 1.49 | 0.03 |
| SORBS3   | 1.9  | 0.04 | PTS          | 1.81 | 0.05 | DSTN        | 1.49 | 0.03 |
| NONO     | 1.9  | 0.02 | NPY6R        | 1.81 | 0.02 | EPS8L2      | 1.49 | 0.01 |
| SLC6A8   | 1.9  | 0.03 | SSX2IP       | 1.81 | 0.02 | GPSN2       | 1.49 | 0.03 |
| CSNK1A1  | 1.9  | 0.04 | MINA         | 1.81 | 0.03 | GLT25D1     | 1.49 | 0.02 |
| HARS     | 1.89 | 0.02 | TLL2         | 1.81 | 0.04 | RARG        | 1.49 | 0.04 |
| PYCR1    | 1.89 | 0.05 | GOLGA5       | 1.81 | 0.05 | SMTN        | 1.49 | 0.03 |
| ZER1     | 1.89 | 0.02 | ARID1A       | 1.81 | 0.05 | TRAM1       | 1.49 | 0.04 |
| NPC1     | 1.89 | 0.02 | TIPIN        | 1.81 | 0.02 | BLVRB       | 1.48 | 0.05 |
| IL6ST    | 1.89 | 0.05 | PRPF18       | 1.81 | 0.04 | CABIN1      | 1.48 | 0.02 |
| AP1B1    | 1.89 | 0.05 | FLJ32679 /// | 1.81 | 0.05 | PDCD4       | 1.48 | 0.05 |
| TBC1D22A | 1.89 | 0.02 | TMEM147      | 1.8  | 0.02 | SLC7A1      | 1.48 | 0.02 |

|            |      |      |          |      |      |           |      |      |
|------------|------|------|----------|------|------|-----------|------|------|
| PELI2      | 1.89 | 0.04 | NTRK2    | 1.8  | 0.05 | MAN1A2    | 1.48 | 0.05 |
| LRP12      | 1.89 | 0.05 | NEU1     | 1.8  | 0.03 | TBC1D9B   | 1.48 | 0.04 |
| EHD1       | 1.89 | 0.02 | ATP5I    | 1.8  | 0.04 | MAT2A     | 1.48 | 0.02 |
| NUCB1      | 1.88 | 0.05 | CLCC1    | 1.8  | 0.03 | PABPC3    | 1.48 | 0.03 |
| PGD        | 1.88 | 0.05 | RABL3    | 1.8  | 0.05 | SNCAIP    | 1.48 | 0.04 |
| BTG2       | 1.88 | 0.03 | C17orf90 | 1.8  | 0.04 | BCL10     | 1.47 | 0.04 |
| SPTLC2     | 1.88 | 0.02 | TOR1AIP1 | 1.79 | 0.03 | DNAJB4    | 1.47 | 0.04 |
| GIT1       | 1.88 | 0.02 | VPS52    | 1.79 | 0.05 | EHD4      | 1.47 | 0.04 |
| EDC3       | 1.88 | 0.04 | PMS2L2   | 1.79 | 0.04 | LOC653562 | 1.47 | 0.04 |
| APOL3      | 1.88 | 0.05 | ATPBD1C  | 1.79 | 0.04 | ETV5      | 1.47 | 0.04 |
| PGRMC1     | 1.87 | 0.03 | TSPAN13  | 1.78 | 0.04 | HR        | 1.47 | 0.05 |
| CHD4       | 1.87 | 0.04 | COPS4    | 1.78 | 0.04 | TMEM57    | 1.47 | 0.05 |
| ITPR3      | 1.87 | 0.05 | MRT04    | 1.78 | 0.05 | PABPN1    | 1.47 | 0.01 |
| GRSF1      | 1.87 | 0.05 | LSG1     | 1.78 | 0.03 | PPP1R15A  | 1.47 | 0.03 |
| FOXK2      | 1.87 | 0.04 | DDX27    | 1.78 | 0.05 | OVOL2     | 1.47 | 0.05 |
| LMNA       | 1.87 | 0.05 | CKS1B    | 1.77 | 0.02 | ATP6V1C1  | 1.46 | 0.04 |
| GGH        | 1.87 | 0.02 | NFYA     | 1.77 | 0.04 | CNOT8     | 1.46 | 0.04 |
| CSNK2A1    | 1.87 | 0.04 | SNX4     | 1.77 | 0.03 | CD24      | 1.46 | 0.04 |
| STIP1      | 1.87 | 0.03 | DLX2     | 1.77 | 0.03 | HABP4     | 1.46 | 0.04 |
| ERGIC3     | 1.87 | 0.03 | CSNK1D   | 1.77 | 0.04 | MAP4K1    | 1.46 | 0.04 |
| APBB2      | 1.87 | 0.04 | TMCO1    | 1.77 | 0.02 | PPP2CA    | 1.46 | 0.05 |
| LDLRAP1    | 1.87 | 0.03 | WWC1     | 1.77 | 0.03 | CALU      | 1.45 | 0.02 |
| DNM2       | 1.86 | 0.03 | PHF11    | 1.77 | 0.03 | MAMLD1    | 1.45 | 0.05 |
| TOMM40     | 1.86 | 0.05 | SUOX     | 1.76 | 0.04 | ENO1      | 1.45 | 0.04 |
| RNF44      | 1.86 | 0.02 | TTC3     | 1.76 | 0.04 | PABPC1    | 1.45 | 0.04 |
| GTF2H4     | 1.86 | 0.02 | JARID1B  | 1.76 | 0.04 | F11R      | 1.45 | 0.03 |
| IFT140     | 1.86 | 0.02 | YIPF6    | 1.76 | 0.04 | FOXJ3     | 1.45 | 0.03 |
| IFITM3     | 1.86 | 0.03 | MKL1     | 1.76 | 0.04 | FAM62A    | 1.45 | 0.02 |
| HOXA9      | 1.86 | 0.05 | GALNT11  | 1.76 | 0.03 | NMT1      | 1.45 | 0.03 |
| SLC6A10P / | 1.86 | 0.04 | PIGZ     | 1.76 | 0.04 | PTTG1     | 1.45 | 0.03 |
| RETSAT     | 1.86 | 0.04 | G3BP1    | 1.76 | 0.04 | HIST3H2A  | 1.45 | 0.05 |
| SMEK1      | 1.86 | 0.05 | FBP2     | 1.75 | 0.03 |           |      |      |
| ANKRD13D   | 1.86 | 0.04 | PIGK     | 1.75 | 0.03 |           |      |      |
| RAN        | 1.85 | 0.05 | NR4A3    | 1.75 | 0.05 |           |      |      |
| NCAPD2     | 1.85 | 0.04 | YTHDF2   | 1.75 | 0.04 |           |      |      |
| NFIL3      | 1.85 | 0.03 | CHMP4A   | 1.75 | 0.03 |           |      |      |
| IPO8       | 1.85 | 0.04 | TMEM70   | 1.75 | 0.02 |           |      |      |



|             |      |      |             |      |      |
|-------------|------|------|-------------|------|------|
| TLE3        | 1.85 | 0.05 | CBWD1 /// C | 1.75 | 0.03 |
| MFGE8       | 1.85 | 0.03 | LEF1        | 1.75 | 0.05 |
| PTBP1       | 1.85 | 0.04 | WSB2        | 1.74 | 0.03 |
| CCNE2       | 1.85 | 0.04 | TMCO1       | 1.74 | 0.04 |
| TMEM97      | 1.85 | 0.04 | PTGDS       | 1.74 | 0.05 |
| ZNF282      | 1.85 | 0.05 | RAB22A      | 1.74 | 0.03 |
| RAP2A /// R | 1.85 | 0.05 | RECK        | 1.74 | 0.02 |
| VPS24       | 1.85 | 0.02 | EPS15       | 1.74 | 0.02 |
| SIDT2       | 1.85 | 0.03 | MFSD1       | 1.74 | 0.03 |
| AHCYL1      | 1.84 | 0.05 | MKKS        | 1.74 | 0.04 |
| GAA         | 1.84 | 0.04 | FLJ22167    | 1.74 | 0.05 |
| CC2D1A      | 1.84 | 0.05 | FIP1L1      | 1.74 | 0.04 |
| RHOBTB2     | 1.84 | 0.04 | LAMC1       | 1.73 | 0.03 |
| B3GNT2      | 1.84 | 0.04 | FH          | 1.73 | 0.04 |
| FANCE       | 1.84 | 0.05 | PFN2        | 1.73 | 0.03 |
| FAM89B      | 1.84 | 0.03 | SPA17       | 1.73 | 0.04 |
| B3GAT3      | 1.84 | 0.05 | CYP3A4      | 1.73 | 0.05 |
| LDHA        | 1.83 | 0.03 | XPNPEP1     | 1.73 | 0.03 |
| AAMP        | 1.83 | 0.04 | APPL2       | 1.73 | 0.02 |
| IL13RA1     | 1.83 | 0.01 | HSP90B1     | 1.72 | 0.01 |
| C9orf7      | 1.83 | 0.05 | AK1         | 1.72 | 0.03 |
| KDELR1      | 1.82 | 0.02 | HNRPDL      | 1.72 | 0.05 |
| ACLY        | 1.82 | 0.04 | SR140       | 1.72 | 0.03 |
| PACSIN2     | 1.82 | 0.01 | NBN         | 1.72 | 0.05 |
| AP3B1       | 1.82 | 0.04 | FASTKD3     | 1.72 | 0.04 |
| RBMS1       | 1.82 | 0.03 | SNRPE       | 1.71 | 0.01 |
| RCAN1       | 1.82 | 0.04 | ALAS1       | 1.71 | 0.03 |
| NAB1        | 1.82 | 0.02 | CLCC1       | 1.71 | 0.05 |
| SCAMP1      | 1.82 | 0.05 | CLDND1      | 1.71 | 0.03 |
| RHEB        | 1.82 | 0.02 | ARPP-21     | 1.71 | 0.04 |
| EZR         | 1.82 | 0.05 | UMPS        | 1.7  | 0.05 |
| STEAP3      | 1.82 | 0.03 | MSH6        | 1.7  | 0.04 |
| SPSB3       | 1.82 | 0.03 | CROT        | 1.7  | 0.03 |
| GCAT        | 1.82 | 0.05 | NR2C1       | 1.7  | 0.02 |
| WARS        | 1.81 | 0.04 | GALK2       | 1.7  | 0.05 |
| DDAH2       | 1.81 | 0.04 | UTF1        | 1.7  | 0.01 |
| RTN2        | 1.81 | 0.02 | ZNF614      | 1.7  | 0.03 |

|             |      |      |              |      |      |
|-------------|------|------|--------------|------|------|
| SLC1A1      | 1.81 | 0.03 | C14orf124    | 1.7  | 0.05 |
| SLC6A3      | 1.81 | 0.05 | ANAPC5       | 1.69 | 0.03 |
| FSTL1       | 1.81 | 0.04 | MTX1         | 1.69 | 0.04 |
| NRXN2       | 1.81 | 0.03 | TYMS         | 1.69 | 0.04 |
| CUL4B       | 1.81 | 0.03 | LOC222070    | 1.69 | 0.03 |
| RTN4        | 1.81 | 0.04 | PSMD4        | 1.68 | 0.05 |
| AP2S1       | 1.81 | 0.05 | NFX1         | 1.68 | 0.05 |
| MAP4        | 1.81 | 0.03 | IDE          | 1.68 | 0.03 |
| AES         | 1.81 | 0.04 | U1SNRNPB     | 1.68 | 0.02 |
| ILF3        | 1.81 | 0.04 | DAP3         | 1.68 | 0.03 |
| PDXK        | 1.81 | 0.04 | MAN2B1       | 1.68 | 0.05 |
| MRPS30      | 1.81 | 0.03 | USP24        | 1.68 | 0.05 |
| KIAA0194    | 1.81 | 0.04 | TPSAB1       | 1.68 | 0.05 |
| MGST3       | 1.8  | 0.03 | FIS1         | 1.68 | 0.05 |
| HPN         | 1.8  | 0.03 | CCDC90B      | 1.68 | 0.04 |
| BIN1        | 1.8  | 0.05 | LRRC1        | 1.68 | 0.02 |
| CLIP2       | 1.8  | 0.02 | FAM91A2      | 1.68 | 0.04 |
| ALDH4A1     | 1.8  | 0.03 | ARHGAP19     | 1.68 | 0.05 |
| ANKMY2      | 1.8  | 0.02 | HADH         | 1.67 | 0.03 |
| PIAS2       | 1.8  | 0.05 | CSE1L        | 1.67 | 0.03 |
| GOLSYN      | 1.8  | 0.04 | ATP5J2       | 1.67 | 0.04 |
| NPM1        | 1.8  | 0.02 | CCNT2        | 1.67 | 0.04 |
| CTSB        | 1.79 | 0.03 | RNASE2       | 1.67 | 0.04 |
| TACC1       | 1.79 | 0.04 | TGDS         | 1.67 | 0.03 |
| DDX3X       | 1.79 | 0.04 | ESD          | 1.67 | 0.05 |
| PSCD1       | 1.79 | 0.05 | PEG10        | 1.67 | 0.05 |
| KDEL3       | 1.79 | 0.02 | NIPA2        | 1.67 | 0.05 |
| MVK         | 1.79 | 0.05 | GOLGA4       | 1.67 | 0.05 |
| GANAB       | 1.79 | 0.05 | NF2          | 1.67 | 0.03 |
| SLC1A4      | 1.79 | 0.03 | RAP1GDS1     | 1.67 | 0.05 |
| DDX11 /// D | 1.79 | 0.05 | LOC283871    | 1.67 | 0.05 |
| LOC89944    | 1.79 | 0.01 | IL17RB       | 1.67 | 0.05 |
| RNF130      | 1.79 | 0.02 | FLJ12986 /// | 1.67 | 0.02 |
| RNASET2     | 1.79 | 0.04 | CUGBP1       | 1.67 | 0.04 |
| PTPLA       | 1.79 | 0.04 | PSME1        | 1.66 | 0.03 |
| SLC3A2      | 1.78 | 0.03 | LAMP2        | 1.66 | 0.02 |
| CIB1        | 1.78 | 0.01 | CUL4B        | 1.66 | 0.03 |

|           |      |      |           |      |      |
|-----------|------|------|-----------|------|------|
| SEC14L1   | 1.78 | 0.02 | KIFAP3    | 1.66 | 0.01 |
| SCAMP1    | 1.78 | 0.04 | TMPO      | 1.66 | 0.04 |
| DGCR6     | 1.78 | 0.03 | ADCYAP1   | 1.66 | 0.04 |
| AGPAT2    | 1.78 | 0.04 | LOC400506 | 1.66 | 0.04 |
| SAP30L    | 1.78 | 0.05 | DDX27     | 1.66 | 0.02 |
| TMEM189-U | 1.77 | 0.03 | LPHN1     | 1.66 | 0.04 |
| EIF5B     | 1.77 | 0.05 | CALM3     | 1.65 | 0.02 |
| CTDSPL    | 1.77 | 0.03 | FDPS      | 1.65 | 0.03 |
| CLTB      | 1.77 | 0.04 | CSTF1     | 1.65 | 0.04 |
| RRAS      | 1.77 | 0.04 | MGAT2     | 1.65 | 0.05 |
| JAM3      | 1.77 | 0.04 | CDC16     | 1.65 | 0.05 |
| ACOT7     | 1.77 | 0.05 | C14orf109 | 1.65 | 0.04 |
| LOC730092 | 1.77 | 0.04 | SEC31A    | 1.65 | 0.03 |
| JHDM1D    | 1.77 | 0.05 | UBE2Q1    | 1.65 | 0.03 |
| NPM1      | 1.77 | 0.03 | RWDD2B    | 1.65 | 0.02 |
| MCM4      | 1.77 | 0.02 | USP16     | 1.65 | 0.03 |
| UBE2D2    | 1.76 | 0.04 | TOMM70A   | 1.64 | 0.03 |
| IFNGR1    | 1.76 | 0.05 | SV2A      | 1.64 | 0.04 |
| PTEN      | 1.76 | 0.03 | STBD1     | 1.64 | 0.04 |
| SLC17A7   | 1.76 | 0.05 | CCNH      | 1.64 | 0.03 |
| DNASE2    | 1.76 | 0.03 | CAMKK2    | 1.64 | 0.03 |
| PACSIN3   | 1.76 | 0.02 | LOC92482  | 1.64 | 0.05 |
| EIF4EBP1  | 1.76 | 0.01 | TDRD7     | 1.64 | 0.04 |
| CPSF1     | 1.75 | 0.04 | DERL2     | 1.64 | 0.05 |
| PLTP      | 1.75 | 0.05 | C2orf28   | 1.64 | 0.04 |
| SHROOM2   | 1.75 | 0.05 | TMEM80    | 1.64 | 0.05 |
| AHDC1     | 1.75 | 0.04 | NRG1      | 1.63 | 0.05 |
| AMH       | 1.75 | 0.05 | PARP2     | 1.63 | 0.05 |
| DBP       | 1.75 | 0.05 | HTR1F     | 1.63 | 0.02 |
| BTN3A2    | 1.75 | 0.03 | ZNF142    | 1.63 | 0.04 |
| ZNF706    | 1.75 | 0.03 | KEAP1     | 1.62 | 0.02 |
| MICALL2   | 1.75 | 0.04 | LARP5     | 1.62 | 0.02 |
| RIC8B     | 1.75 | 0.03 | CYP2B6    | 1.62 | 0.02 |
| ARL6IP5   | 1.74 | 0.05 | C7orf49   | 1.62 | 0.05 |
| CTNNA1    | 1.74 | 0.02 | TMED2     | 1.61 | 0.02 |
| MCM5      | 1.74 | 0.05 | ECHS1     | 1.61 | 0.04 |
| LEPROTL1  | 1.74 | 0.04 | CAPZA2    | 1.61 | 0.04 |

|                  |      |      |                 |      |      |
|------------------|------|------|-----------------|------|------|
| <b>FANCA</b>     | 1.74 | 0.05 | <b>COG2</b>     | 1.61 | 0.05 |
| <b>PDIA5</b>     | 1.74 | 0.03 | <b>CUL2</b>     | 1.61 | 0.02 |
| <b>MEGF9</b>     | 1.74 | 0.05 | <b>MYBPC2</b>   | 1.61 | 0.04 |
| <b>NUDT2</b>     | 1.74 | 0.04 | <b>LSM8</b>     | 1.61 | 0.02 |
| <b>SDK2</b>      | 1.74 | 0.05 | <b>ACP1</b>     | 1.6  | 0.03 |
| <b>FBXO38</b>    | 1.74 | 0.05 | <b>AGL</b>      | 1.6  | 0.03 |
| <b>ATP6V1H</b>   | 1.74 | 0.02 | <b>ERCC1</b>    | 1.6  | 0.05 |
| <b>RAB15</b>     | 1.74 | 0.05 | <b>FGFBP1</b>   | 1.6  | 0.04 |
| <b>PXN</b>       | 1.73 | 0.04 | <b>AVPR2</b>    | 1.6  | 0.04 |
| <b>MAP2K4</b>    | 1.73 | 0.03 | <b>EI24</b>     | 1.6  | 0.03 |
| <b>CDK2</b>      | 1.73 | 0.05 | <b>RRM2</b>     | 1.6  | 0.02 |
| <b>SH3GLB1</b>   | 1.73 | 0.04 | <b>PIGL</b>     | 1.6  | 0.04 |
| <b>SSX3</b>      | 1.73 | 0.01 | <b>TMF1</b>     | 1.6  | 0.04 |
| <b>TMEM97</b>    | 1.73 | 0.02 | <b>GLT8D1</b>   | 1.6  | 0.05 |
| <b>TTL12</b>     | 1.73 | 0.04 | <b>BCL11A</b>   | 1.6  | 0.05 |
| <b>LPPR2</b>     | 1.73 | 0.03 | <b>NME7</b>     | 1.6  | 0.04 |
| <b>FAM108B1</b>  | 1.73 | 0.05 | <b>IMPDH2</b>   | 1.59 | 0.05 |
| <b>SDC3</b>      | 1.72 | 0.05 | <b>DPAGT1</b>   | 1.59 | 0.03 |
| <b>HBEGF</b>     | 1.72 | 0.05 | <b>MSL-1</b>    | 1.59 | 0.05 |
| <b>MAN1B1</b>    | 1.72 | 0.05 | <b>ARGLU1</b>   | 1.59 | 0.05 |
| <b>TPP1</b>      | 1.71 | 0.03 | <b>APEH</b>     | 1.58 | 0.04 |
| <b>CKB</b>       | 1.71 | 0.03 | <b>PMF1</b>     | 1.58 | 0.04 |
| <b>BIRC2</b>     | 1.71 | 0.03 | <b>GOLGA1</b>   | 1.58 | 0.02 |
| <b>IMPA2</b>     | 1.71 | 0.04 | <b>FAM98A</b>   | 1.58 | 0.03 |
| <b>APC</b>       | 1.71 | 0.05 | <b>YLPM1</b>    | 1.58 | 0.05 |
| <b>COL6A1</b>    | 1.71 | 0.02 | <b>HRB</b>      | 1.58 | 0.05 |
| <b>LOC552889</b> | 1.71 | 0.04 | <b>REPIN1</b>   | 1.58 | 0.04 |
| <b>KIAA0323</b>  | 1.71 | 0.03 | <b>PCID2</b>    | 1.58 | 0.02 |
| <b>CAP1</b>      | 1.71 | 0.04 | <b>RPS27A</b>   | 1.57 | 0.05 |
| <b>RTN4</b>      | 1.71 | 0.04 | <b>OPRS1</b>    | 1.57 | 0.02 |
| <b>DR1</b>       | 1.71 | 0.03 | <b>PSMB4</b>    | 1.57 | 0.04 |
| <b>SFXN3</b>     | 1.71 | 0.03 | <b>TIMM8A</b>   | 1.57 | 0.04 |
| <b>ATP5SL</b>    | 1.71 | 0.04 | <b>MED8</b>     | 1.57 | 0.04 |
| <b>TELO2</b>     | 1.71 | 0.04 | <b>ARPC2</b>    | 1.57 | 0.05 |
| <b>CYHR1</b>     | 1.7  | 0.05 | <b>MARS</b>     | 1.57 | 0.05 |
| <b>KCMF1</b>     | 1.7  | 0.04 | <b>HIST1H3D</b> | 1.57 | 0.05 |
| <b>WDR55</b>     | 1.7  | 0.05 | <b>SCFD1</b>    | 1.57 | 0.05 |

|              |      |      |            |      |      |
|--------------|------|------|------------|------|------|
| KCTD2        | 1.7  | 0.03 | HCG4P6     | 1.57 | 0.04 |
| INTS5        | 1.7  | 0.05 | SEC11A     | 1.57 | 0.05 |
| OAZ2         | 1.69 | 0.01 | SRBD1      | 1.57 | 0.04 |
| TK2          | 1.69 | 0.04 | SH2D4A     | 1.57 | 0.05 |
| TMED3        | 1.69 | 0.02 | KARS       | 1.56 | 0.04 |
| RAD17        | 1.69 | 0.05 | MED14      | 1.56 | 0.01 |
| RANGAP1      | 1.69 | 0.05 | DNAJB9     | 1.56 | 0.02 |
| ZCCHC14      | 1.69 | 0.05 | ING3       | 1.56 | 0.05 |
| WEE1         | 1.69 | 0.04 | UQCC       | 1.56 | 0.05 |
| GTPBP2       | 1.69 | 0.04 | ZBED5      | 1.56 | 0.03 |
| GPR137       | 1.69 | 0.03 | CIRBP      | 1.55 | 0.03 |
| LGALS1       | 1.68 | 0.04 | ADAR       | 1.55 | 0.03 |
| DDX19A /// D | 1.68 | 0.05 | HTATSF1    | 1.55 | 0.04 |
| TERF2        | 1.68 | 0.04 | DKFZp434H  | 1.55 | 0.05 |
| GLRX         | 1.68 | 0.05 | HOXB7      | 1.55 | 0.04 |
| APBA2        | 1.68 | 0.04 | DIMT1L     | 1.55 | 0.03 |
| RBMX         | 1.68 | 0.03 | C12orf47   | 1.55 | 0.01 |
| YKT6         | 1.68 | 0.05 | PPM1B      | 1.54 | 0.04 |
| DDEF1        | 1.68 | 0.05 | MINPP1     | 1.54 | 0.05 |
| WDR1         | 1.67 | 0.03 | UCK2       | 1.54 | 0.04 |
| HNRNPC       | 1.67 | 0.02 | RPL5       | 1.54 | 0.03 |
| CTSB         | 1.67 | 0.05 | SFRS2      | 1.54 | 0.05 |
| PJA2         | 1.67 | 0.04 | FBXO21     | 1.54 | 0.04 |
| MARS         | 1.67 | 0.05 | CSAG3A /// | 1.54 | 0.04 |
| BLMH         | 1.67 | 0.03 | CDCA3      | 1.54 | 0.05 |
| RXRA         | 1.67 | 0.04 | KIAA0859   | 1.53 | 0.05 |
| SS18         | 1.67 | 0.03 | AURKB      | 1.53 | 0.03 |
| KIAA0746     | 1.67 | 0.05 | PA2G4      | 1.53 | 0.03 |
| CCDC99       | 1.67 | 0.03 | PSMA7      | 1.53 | 0.05 |
| KIAA0494     | 1.66 | 0.03 | ENPEP      | 1.52 | 0.05 |
| GTF2E2       | 1.66 | 0.03 | ADAM17     | 1.52 | 0.04 |
| CEBPG        | 1.66 | 0.04 | CDH16      | 1.52 | 0.04 |
| ZNF189       | 1.66 | 0.03 | DDX21      | 1.52 | 0.04 |
| DLG3         | 1.66 | 0.04 | GORASP2    | 1.52 | 0.05 |
| MXD4         | 1.66 | 0.03 | DOT1L      | 1.51 | 0.03 |
| MAGEA4       | 1.66 | 0.05 | CCDC88C    | 1.51 | 0.05 |
| MACROD1      | 1.66 | 0.02 | PNRC2      | 1.51 | 0.05 |

|              |      |      |           |      |      |
|--------------|------|------|-----------|------|------|
| TINP1        | 1.65 | 0.03 | PPA1      | 1.51 | 0.05 |
| KIAA0247     | 1.65 | 0.05 | C5orf3    | 1.51 | 0.05 |
| E2F4         | 1.65 | 0.04 | C14orf138 | 1.51 | 0.04 |
| SKP2         | 1.65 | 0.03 | RBM34     | 1.5  | 0.04 |
| SMTN         | 1.65 | 0.04 | PMS2      | 1.5  | 0.05 |
| MALT1        | 1.65 | 0.04 | DONSON    | 1.5  | 0.04 |
| ABI1         | 1.65 | 0.04 | CLDN11    | 1.49 | 0.05 |
| JMJD2B       | 1.65 | 0.05 | POLR3C    | 1.49 | 0.04 |
| DLST /// DLS | 1.65 | 0.04 | DAPK1     | 1.49 | 0.04 |
| CARHSP1      | 1.65 | 0.05 | EPHB1     | 1.49 | 0.04 |
| ZCCHC6       | 1.65 | 0.02 | BMI1      | 1.48 | 0.05 |
| SCD          | 1.64 | 0.05 | CEBPD     | 1.48 | 0.05 |
| PTDSS1       | 1.64 | 0.05 | CSRP2     | 1.48 | 0.02 |
| TCTN3        | 1.64 | 0.03 | EXOSC10   | 1.48 | 0.05 |
| PDXK         | 1.64 | 0.02 | CLEC11A   | 1.48 | 0.04 |
| CLN6         | 1.64 | 0.05 | MAGEA5    | 1.48 | 0.03 |
| SBF1         | 1.64 | 0.04 | TCEB2     | 1.47 | 0.05 |
| KIAA0494     | 1.63 | 0.05 | OCA2      | 1.47 | 0.04 |
| POLS         | 1.63 | 0.05 | CDKN2A    | 1.47 | 0.04 |
| RFX5         | 1.63 | 0.05 | FAM128A   | 1.47 | 0.04 |
| ACVR2A       | 1.63 | 0.04 | DYSF      | 1.47 | 0.05 |
| RNF113A      | 1.63 | 0.03 | POLR3K    | 1.47 | 0.03 |
| P4HB         | 1.62 | 0.03 | CCT8      | 1.46 | 0.04 |
| PPP2CB       | 1.62 | 0.02 | EZH1      | 1.46 | 0.05 |
| GRK6         | 1.62 | 0.04 | SFRS2B    | 1.46 | 0.04 |
| PSMA6        | 1.62 | 0.04 | ABHD9     | 1.46 | 0.03 |
| CLCN7        | 1.62 | 0.04 | CCDC28A   | 1.45 | 0.05 |
| BAIAP2       | 1.62 | 0.04 | ZNF552    | 1.45 | 0.05 |
| YKT6         | 1.62 | 0.03 |           |      |      |
| SDF4         | 1.62 | 0.05 |           |      |      |
| NINJ1        | 1.61 | 0.05 |           |      |      |
| TGIF1        | 1.61 | 0.05 |           |      |      |
| RAD1         | 1.61 | 0.03 |           |      |      |
| DYNC111      | 1.61 | 0.03 |           |      |      |
| TNIP1        | 1.61 | 0.04 |           |      |      |
| BAT2         | 1.61 | 0.04 |           |      |      |
| EEF1D /// E  | 1.61 | 0.03 |           |      |      |

|                 |      |      |
|-----------------|------|------|
| <b>FAS</b>      | 1.61 | 0.05 |
| <b>TULP3</b>    | 1.61 | 0.03 |
| <b>RANBP2</b>   | 1.6  | 0.05 |
| <b>PPP2R5D</b>  | 1.6  | 0.04 |
| <b>SGSM3</b>    | 1.6  | 0.02 |
| <b>AP3B1</b>    | 1.6  | 0.03 |
| <b>NONO</b>     | 1.6  | 0.05 |
| <b>ITPK1</b>    | 1.6  | 0.03 |
| <b>RAD17</b>    | 1.6  | 0.04 |
| <b>POP1</b>     | 1.6  | 0.04 |
| <b>WDTC1</b>    | 1.6  | 0.05 |
| <b>CYP2W1</b>   | 1.6  | 0.04 |
| <b>SND1</b>     | 1.59 | 0.02 |
| <b>SLC25A36</b> | 1.59 | 0.04 |
| <b>MORC2</b>    | 1.59 | 0.03 |
| <b>NFE2L3</b>   | 1.59 | 0.05 |
| <b>CALCOCO2</b> | 1.59 | 0.03 |
| <b>PRELP</b>    | 1.59 | 0.04 |
| <b>RAB26</b>    | 1.59 | 0.05 |
| <b>TMEM109</b>  | 1.58 | 0.04 |
| <b>GART</b>     | 1.58 | 0.03 |
| <b>RGS14</b>    | 1.58 | 0.02 |
| <b>DCTD</b>     | 1.57 | 0.05 |
| <b>ATP6AP1</b>  | 1.57 | 0.02 |
| <b>HTATIP</b>   | 1.57 | 0.04 |
| <b>PIGO</b>     | 1.57 | 0.03 |
| <b>C1orf144</b> | 1.57 | 0.05 |
| <b>SGPL1</b>    | 1.57 | 0.02 |
| <b>C1orf160</b> | 1.57 | 0.05 |
| <b>TMEM184B</b> | 1.56 | 0.04 |
| <b>NUP62</b>    | 1.56 | 0.05 |
| <b>APLP2</b>    | 1.56 | 0.05 |
| <b>TMED7</b>    | 1.56 | 0.02 |
| <b>RAB26</b>    | 1.56 | 0.02 |
| <b>PRKD2</b>    | 1.56 | 0.01 |
| <b>HIP1R</b>    | 1.56 | 0.03 |
| <b>RALY</b>     | 1.55 | 0.05 |

|                   |      |      |
|-------------------|------|------|
| <b>CD55</b>       | 1.55 | 0.04 |
| <b>FSTL3</b>      | 1.55 | 0.05 |
| <b>INPP4A</b>     | 1.55 | 0.03 |
| <b>DLG3</b>       | 1.55 | 0.05 |
| <b>ERBB2</b>      | 1.55 | 0.05 |
| <b>CDCA4</b>      | 1.55 | 0.05 |
| <b>PEX14</b>      | 1.55 | 0.04 |
| <b>STAB1</b>      | 1.55 | 0.01 |
| <b>SLC35E1</b>    | 1.55 | 0.02 |
| <b>CCS</b>        | 1.54 | 0.03 |
| <b>MPP2</b>       | 1.54 | 0.04 |
| <b>FAM62A</b>     | 1.54 | 0.03 |
| <b>PNMA2</b>      | 1.54 | 0.04 |
| <b>ING1</b>       | 1.54 | 0.05 |
| <b>PFKM</b>       | 1.54 | 0.02 |
| <b>NUP188</b>     | 1.54 | 0.03 |
| <b>GNA11</b>      | 1.54 | 0.05 |
| <b>GNA11</b>      | 1.54 | 0.05 |
| <b>SCUBE3</b>     | 1.54 | 0.04 |
| <b>SIL1</b>       | 1.54 | 0.03 |
| <b>ZNF580</b>     | 1.54 | 0.04 |
| <b>PILRB</b>      | 1.54 | 0.05 |
| <b>CCNL2</b>      | 1.54 | 0.04 |
| <b>MBD3</b>       | 1.54 | 0.02 |
| <b>NPC2</b>       | 1.53 | 0.05 |
| <b>PEPD</b>       | 1.53 | 0.04 |
| <b>CTSH</b>       | 1.53 | 0.04 |
| <b>TFRC</b>       | 1.53 | 0.03 |
| <b>TUBB6</b>      | 1.53 | 0.04 |
| <b>RAD1</b>       | 1.53 | 0.05 |
| <b>RP11-365K2</b> | 1.53 | 0.02 |
| <b>ANKZF1</b>     | 1.53 | 0.02 |
| <b>MRPL22</b>     | 1.53 | 0.04 |
| <b>UBE2W</b>      | 1.53 | 0.05 |
| <b>TMEM176B</b>   | 1.53 | 0.05 |
| <b>HAO2</b>       | 1.53 | 0.04 |
| <b>PDHA1</b>      | 1.52 | 0.02 |



|                 |      |      |
|-----------------|------|------|
| <b>SUPT5H</b>   | 1.52 | 0.04 |
| <b>SHFM1</b>    | 1.52 | 0.05 |
| <b>CBFB</b>     | 1.52 | 0.04 |
| <b>CD164</b>    | 1.52 | 0.05 |
| <b>EIF3E</b>    | 1.52 | 0.05 |
| <b>CSNK1A1</b>  | 1.52 | 0.04 |
| <b>IL10RB</b>   | 1.52 | 0.04 |
| <b>B9D1</b>     | 1.52 | 0.02 |
| <b>EXOC7</b>    | 1.52 | 0.05 |
| <b>SLC2A8</b>   | 1.52 | 0.03 |
| <b>CENTA1</b>   | 1.52 | 0.03 |
| <b>HSPH1</b>    | 1.51 | 0.04 |
| <b>GRB10</b>    | 1.51 | 0.05 |
| <b>CRADD</b>    | 1.51 | 0.04 |
| <b>LRRC23</b>   | 1.51 | 0.05 |
| <b>GGA1</b>     | 1.51 | 0.04 |
| <b>DSTN</b>     | 1.5  | 0.04 |
| <b>GTF2F1</b>   | 1.5  | 0.03 |
| <b>TNK2</b>     | 1.5  | 0.05 |
| <b>SSX3</b>     | 1.5  | 0.02 |
| <b>HMX1</b>     | 1.5  | 0.03 |
| <b>OS9</b>      | 1.5  | 0.05 |
| <b>GTF2IRD1</b> | 1.5  | 0.04 |
| <b>AKAP1</b>    | 1.49 | 0.05 |
| <b>DNAJB2</b>   | 1.49 | 0.04 |
| <b>LEPROTL1</b> | 1.49 | 0.04 |
| <b>NCKAP1</b>   | 1.49 | 0.05 |
| <b>WBP2</b>     | 1.49 | 0.05 |
| <b>SSX2</b>     | 1.49 | 0.03 |
| <b>CELSR1</b>   | 1.49 | 0.05 |
| <b>GFPT1</b>    | 1.48 | 0.03 |
| <b>CLTA</b>     | 1.48 | 0.03 |
| <b>BTRC</b>     | 1.48 | 0.04 |
| <b>GCAT</b>     | 1.48 | 0.04 |
| <b>MACF1</b>    | 1.48 | 0.04 |
| <b>RBM38</b>    | 1.48 | 0.05 |
| <b>DHFR</b>     | 1.48 | 0.05 |

|                 |      |      |
|-----------------|------|------|
| <b>RCN3</b>     | 1.48 | 0.03 |
| <b>AFG3L2</b>   | 1.47 | 0.05 |
| <b>E2F6</b>     | 1.47 | 0.05 |
| <b>PKMYT1</b>   | 1.47 | 0.03 |
| <b>ATP1B3</b>   | 1.47 | 0.05 |
| <b>IHPK1</b>    | 1.47 | 0.03 |
| <b>GPR137</b>   | 1.47 | 0.03 |
| <b>TPP1</b>     | 1.46 | 0.03 |
| <b>PFDN1</b>    | 1.46 | 0.05 |
| <b>DNM1L</b>    | 1.46 | 0.03 |
| <b>EIF1</b>     | 1.46 | 0.02 |
| <b>KIAA0692</b> | 1.46 | 0.04 |
| <b>NDRG3</b>    | 1.46 | 0.04 |
| <b>LANCL2</b>   | 1.46 | 0.03 |
| <b>CALML4</b>   | 1.46 | 0.02 |
| <b>PTPN21</b>   | 1.45 | 0.03 |
| <b>G3BP1</b>    | 1.45 | 0.04 |
| <b>FXR1</b>     | 1.45 | 0.05 |
| <b>CD47</b>     | 1.45 | 0.04 |
| <b>RPS21</b>    | 1.45 | 0.03 |
| <b>NXT1</b>     | 1.45 | 0.05 |
| <b>FAM60A</b>   | 1.45 | 0.05 |
| <b>TBC1D16</b>  | 1.45 | 0.05 |

**Supplementary Table 2** Genes differentially expressed in response to DHT for 2hr in Rv1 cells

| Symbol                         | Entrez Gene Name                                                                                      | Fold Change | P value | Location               | Type     |
|--------------------------------|-------------------------------------------------------------------------------------------------------|-------------|---------|------------------------|----------|
| EDA                            | ectodysplasin A                                                                                       | -1.65       | 0.0503  | Extracellular<br>Space | cytokine |
| FBRS                           | fibrosin                                                                                              | -1.48       | 0.0272  | Extracellular<br>Space | cytokine |
| IFNW1                          | interferon, omega 1                                                                                   | -1.71       | 0.0139  | Extracellular<br>Space | cytokine |
| ACLY                           | ATP citrate lyase                                                                                     | -1.48       | 0.0466  | Cytoplasm              | enzyme   |
| ADH5<br>(includes<br>EG:128)   | alcohol dehydrogenase 5 (class III), chi<br>polypeptide                                               | 1.48        | 0.0456  | Cytoplasm              | enzyme   |
| AGL                            | amylo-1, 6-glucosidase, 4-alpha-<br>glucanotransferase                                                | 1.67        | 0.0278  | Unknown                | enzyme   |
| AGPAT5                         | 1-acylglycerol-3-phosphate O-acyltransferase<br>5 (lysophosphatidic acid acyltransferase,<br>epsilon) | 1.69        | 0.0511  | Cytoplasm              | enzyme   |
| ALDH1L1                        | aldehyde dehydrogenase 1 family, member<br>L1                                                         | 1.67        | 0.0128  | Cytoplasm              | enzyme   |
| ALDH4A1                        | aldehyde dehydrogenase 4 family, member<br>A1                                                         | -2          | 0.0208  | Cytoplasm              | enzyme   |
| ALDH6A1                        | aldehyde dehydrogenase 6 family, member<br>A1                                                         | 1.98        | 0.0372  | Cytoplasm              | enzyme   |
| ARF4                           | ADP-ribosylation factor 4                                                                             | 1.63        | 0.0413  | Cytoplasm              | enzyme   |
| ASMTL<br>(includes<br>EG:8623) | acetylserotonin O-methyltransferase-like                                                              | -1.79       | 0.0217  | Unknown                | enzyme   |
| ASPH                           | aspartate beta-hydroxylase                                                                            | 1.83        | 0.0398  | Cytoplasm              | enzyme   |
| B3GAT3                         | beta-1,3-glucuronyltransferase 3<br>(glucuronosyltransferase I)                                       | -1.51       | 0.0279  | Cytoplasm              | enzyme   |
| B4GALT1                        | UDP-Gal:betaGlcNAc beta 1,4-<br>galactosyltransferase, polypeptide 1                                  | -2.6        | 0.0353  | Cytoplasm              | enzyme   |
| B4GALT5                        | UDP-Gal:betaGlcNAc beta 1,4-<br>galactosyltransferase, polypeptide 5                                  | -1.52       | 0.0498  | Cytoplasm              | enzyme   |
| BAT3                           | HLA-B associated transcript 3                                                                         | -1.54       | 0.0181  | Nucleus<br>Plasma      | enzyme   |
| CA12                           | carbonic anhydrase XII                                                                                | 1.61        | 0.0376  | Membrane               | enzyme   |
| CA5B                           | carbonic anhydrase VB, mitochondrial                                                                  | -1.49       | 0.0139  | Cytoplasm              | enzyme   |
| CASZ1                          | castor zinc finger 1                                                                                  | -1.82       | 0.0343  | Nucleus                | enzyme   |
| CDO1                           | cysteine dioxygenase, type I                                                                          | -1.78       | 0.0438  | Cytoplasm              | enzyme   |
| CHSY1                          | chondroitin sulfate synthase 1                                                                        | 1.92        | 0.0478  | Cytoplasm              | enzyme   |
| CMAS                           | cytidine monophosphate N-acetylneuraminic<br>acid synthetase                                          | 2.08        | 0.0309  | Nucleus                | enzyme   |
| COX11                          | COX11 homolog, cytochrome c oxidase<br>assembly protein (yeast)                                       | 1.58        | 0.0464  | Cytoplasm              | enzyme   |
| COX7A2                         | cytochrome c oxidase subunit VIIa<br>polypeptide 2 (liver)                                            | 1.54        | 0.0499  | Cytoplasm              | enzyme   |
| CRAT                           | carnitine acetyltransferase                                                                           | -3.1        | 0.0155  | Cytoplasm              | enzyme   |
| CTBP1                          | C-terminal binding protein 1                                                                          | -1.52       | 0.0176  | Nucleus                | enzyme   |
| CYP27B1                        | cytochrome P450, family 27, subfamily B,<br>polypeptide 1                                             | -1.86       | 0.0499  | Cytoplasm              | enzyme   |
| CYP2A7                         | cytochrome P450, family 2, subfamily A,<br>polypeptide 7                                              | -1.62       | 0.0544  | Cytoplasm              | enzyme   |
| DDAH2                          | dimethylarginine dimethylaminohydrolase 2                                                             | -1.73       | 0.0235  | Unknown                | enzyme   |
| DDX21                          | DEAD (Asp-Glu-Ala-Asp) box polypeptide 21                                                             | 1.68        | 0.0374  | Nucleus                | enzyme   |

|                    |                                                                                                  |       |        |                     |        |
|--------------------|--------------------------------------------------------------------------------------------------|-------|--------|---------------------|--------|
| DDX28              | DEAD (Asp-Glu-Ala-Asp) box polypeptide 28                                                        | -2.31 | 0.0530 | Nucleus             | enzyme |
| DDX3X              | DEAD (Asp-Glu-Ala-Asp) box polypeptide 3, X-linked                                               | -1.85 | 0.0479 | Nucleus             | enzyme |
| DHCR24             | 24-dehydrocholesterol reductase                                                                  | -1.63 | 0.0345 | Cytoplasm           | enzyme |
| DHCR7              | 7-dehydrocholesterol reductase                                                                   | -1.78 | 0.0322 | Cytoplasm           | enzyme |
| DIMT1L             | DIM1 dimethyladenosine transferase 1-like ( <i>S. cerevisiae</i> )                               | 1.56  | 0.0245 | Cytoplasm           | enzyme |
| DIS3               | DIS3 mitotic control homolog ( <i>S. cerevisiae</i> )                                            | 3.73  | 0.0469 | Nucleus<br>Plasma   | enzyme |
| DNM2               | dynamain 2                                                                                       | -1.45 | 0.0353 | Membrane            | enzyme |
| DOHH               | deoxyhypusine hydroxylase/monooxygenase                                                          | -1.69 | 0.0328 | Unknown             | enzyme |
| DPM1               | dolichyl-phosphate mannosyltransferase polypeptide 1, catalytic subunit                          | 1.55  | 0.0414 | Cytoplasm           | enzyme |
| ETFDH              | electron-transferring-flavoprotein dehydrogenase                                                 | 1.54  | 0.0432 | Cytoplasm           | enzyme |
| FBXL5              | F-box and leucine-rich repeat protein 5                                                          | 1.73  | 0.0263 | Cytoplasm           | enzyme |
| FEN1               | flap structure-specific endonuclease 1                                                           | -1.48 | 0.0341 | Nucleus             | enzyme |
| FKBP15             | FK506 binding protein 15, 133kDa                                                                 | -2.47 | 0.0422 | Unknown             | enzyme |
| FLJ21865           | endo-beta-N-acetylglucosaminidase                                                                | -1.96 | 0.0331 | Unknown             | enzyme |
| FTSJ2              | FtsJ homolog 2 ( <i>E. coli</i> )                                                                | 1.57  | 0.0462 | Nucleus             | enzyme |
| G3BP2              | GTPase activating protein (SH3 domain) binding protein 2                                         | -1.69 | 0.0356 | Nucleus             | enzyme |
| GAA                | glucosidase, alpha; acid                                                                         | -1.7  | 0.0317 | Cytoplasm           | enzyme |
| GALNT11            | UDP-N-acetyl-alpha-D-galactosamine:polypeptide N-acetylgalactosaminyltransferase 11 (GalNAc-T11) | 1.57  | 0.0384 | Cytoplasm           | enzyme |
| GBP1               | guanylate binding protein 1, interferon-inducible, 67kDa                                         | -2.88 | 0.0323 | Cytoplasm           | enzyme |
| (includes EG:2633) |                                                                                                  |       |        |                     |        |
| GLT8D1             | glycosyltransferase 8 domain containing 1                                                        | 1.83  | 0.0372 | Unknown             | enzyme |
| GNAI1              | guanine nucleotide binding protein (G protein), alpha inhibiting activity polypeptide 1          | 1.81  | 0.0414 | Plasma<br>Membrane  | enzyme |
| GNL2               | guanine nucleotide binding protein-like 2 (nucleolar)                                            | 1.84  | 0.0387 | Nucleus             | enzyme |
| GNPAT              | glyceronephosphate O-acyltransferase                                                             | 1.6   | 0.0316 | Cytoplasm           | enzyme |
| GPLD1              | glycosylphosphatidylinositol specific phospholipase D1                                           | -2.56 | 0.0421 | Cytoplasm           | enzyme |
| GPT                | glutamic-pyruvate transaminase (alanine aminotransferase)                                        | -2.57 | 0.0275 | Cytoplasm           | enzyme |
| HEXA               | hexosaminidase A (alpha polypeptide)                                                             | -2.2  | 0.0533 | Cytoplasm           | enzyme |
| HNMT               | histamine N-methyltransferase                                                                    | 1.97  | 0.0496 | Cytoplasm           | enzyme |
| HPGD               | hydroxyprostaglandin dehydrogenase 15-(NAD)                                                      | 1.94  | 0.0533 | Cytoplasm           | enzyme |
| HPSE2              | heparanase 2                                                                                     | -1.63 | 0.0451 | Unknown             | enzyme |
| IGHMBP2            | immunoglobulin mu binding protein 2                                                              | -1.53 | 0.0280 | Nucleus             | enzyme |
| IMPAD1             | inositol monophosphatase domain containing 1                                                     | -1.76 | 0.0398 | Unknown             | enzyme |
| KARS               | lysyl-tRNA synthetase                                                                            | 1.5   | 0.0434 | Cytoplasm           | enzyme |
| KAT2A              | K(lysine) acetyltransferase 2A                                                                   | -1.58 | 0.0463 | Cytoplasm<br>Plasma | enzyme |
| LAMP2              | lysosomal-associated membrane protein 2                                                          | 1.89  | 0.0284 | Membrane            | enzyme |
| LARS2              | leucyl-tRNA synthetase 2, mitochondrial                                                          | 1.59  | 0.0491 | Cytoplasm           | enzyme |
| LYPLA2P1           | lysophospholipase II pseudogene 1                                                                | -1.74 | 0.0318 | Unknown             | enzyme |
| MAN1B1             | mannosidase, alpha, class 1B, member 1                                                           | -1.76 | 0.0459 | Cytoplasm           | enzyme |
| MAN2C1             | mannosidase, alpha, class 2C, member 1                                                           | -1.55 | 0.0518 | Cytoplasm           | enzyme |

|         |                                                                                                                          |       |        |                            |        |
|---------|--------------------------------------------------------------------------------------------------------------------------|-------|--------|----------------------------|--------|
| MAPRE3  | microtubule-associated protein, RP/EB family, member 3                                                                   | -2.06 | 0.0521 | Cytoplasm                  | enzyme |
| MARS    | methionyl-tRNA synthetase                                                                                                | 1.85  | 0.0378 | Cytoplasm                  | enzyme |
| MAT2A   | methionine adenosyltransferase II, alpha minichromosome maintenance complex component 5                                  | -2.33 | 0.0352 | Cytoplasm                  | enzyme |
| MCM5    | mannosyl (alpha-1,6-)-glycoprotein beta-1,2-N-acetylglucosaminyltransferase                                              | -1.72 | 0.0370 | Nucleus                    | enzyme |
| MGAT2   | mannosyl (alpha-1,6-)-glycoprotein beta-1,2-N-acetylglucosaminyltransferase                                              | 1.79  | 0.0457 | Cytoplasm                  | enzyme |
| MGRN1   | mahogunin, ring finger 1                                                                                                 | -1.84 | 0.0498 | Cytoplasm                  | enzyme |
| MPI     | mannose phosphate isomerase                                                                                              | -2.32 | 0.0132 | Cytoplasm                  | enzyme |
| MPPE1   | metallophosphoesterase 1                                                                                                 | -1.72 | 0.0335 | Unknown                    | enzyme |
| MVD     | mevalonate (diphospho) decarboxylase                                                                                     | -2.89 | 0.0357 | Cytoplasm                  | enzyme |
| MYO5A   | myosin VA (heavy chain 12, myosin N-acetyltransferase 1 (arylamine N-acetyltransferase))                                 | -2.33 | 0.0271 | Cytoplasm                  | enzyme |
| NAT1    | N-acetyltransferase 1 (arylamine N-acetyltransferase)                                                                    | 2.72  | 0.0124 | Cytoplasm                  | enzyme |
| NAT2    | N-acetyltransferase 2 (arylamine N-acetyltransferase)                                                                    | -1.69 | 0.0199 | Cytoplasm                  | enzyme |
| NCF1    | neutrophil cytosolic factor 1                                                                                            | -1.61 | 0.0333 | Cytoplasm                  | enzyme |
| NDUFA5  | NADH dehydrogenase (ubiquinone) 1 alpha subcomplex, 5, 13kDa                                                             | 1.54  | 0.0413 | Cytoplasm                  | enzyme |
| OGDH    | oxoglutarate (alpha-ketoglutarate) dehydrogenase (lipoamide)                                                             | -2.44 | 0.0334 | Cytoplasm                  | enzyme |
| OGT     | O-linked N-acetylglucosamine (GlcNAc) transferase (UDP-N-acetylglucosamine:polypeptide-N-acetylglucosaminyl transferase) | -1.6  | 0.0479 | Cytoplasm                  | enzyme |
| PCMTD2  | protein-L-isoaspartate (D-aspartate) O-methyltransferase domain containing 2                                             | 2.07  | 0.0208 | Cytoplasm                  | enzyme |
| PDE4C   | phosphodiesterase 4C, cAMP-specific (phosphodiesterase E1 dunce homolog, Drosophila)                                     | 1.68  | 0.0285 | Cytoplasm                  | enzyme |
| PDE4DIP | phosphodiesterase 4D interacting protein                                                                                 | 1.92  | 0.0467 | Cytoplasm                  | enzyme |
| PIGA    | phosphatidylinositol glycan anchor biosynthesis, class A                                                                 | 2.17  | 0.0492 | Cytoplasm                  | enzyme |
| PIGC    | phosphatidylinositol glycan anchor biosynthesis, class C                                                                 | -1.67 | 0.0297 | Cytoplasm                  | enzyme |
| PIGO    | phosphatidylinositol glycan anchor biosynthesis, class O                                                                 | -1.59 | 0.0282 | Cytoplasm<br>Extracellular | enzyme |
| PLA2G2F | phospholipase A2, group IIF                                                                                              | 1.45  | 0.0486 | Space                      | enzyme |
| PLA2G6  | phospholipase A2, group VI (cytosolic, calcium-independent)                                                              | 2.05  | 0.0251 | Cytoplasm                  | enzyme |
| PLCG2   | phospholipase C, gamma 2 (phosphatidylinositol-specific)                                                                 | -1.65 | 0.0439 | Cytoplasm                  | enzyme |
| PLSCR3  | phospholipid scramblase 3                                                                                                | -2.38 | 0.0138 | Cytoplasm                  | enzyme |
| POLR3F  | polymerase (RNA) III (DNA directed)                                                                                      | 2.06  | 0.0363 | Nucleus                    | enzyme |
| POLRMT  | polymerase (RNA) mitochondrial (DNA directed)                                                                            | -1.5  | 0.0319 | Cytoplasm                  | enzyme |
| POMGNT1 | protein O-linked mannosyl transferase                                                                                    | -2.74 | 0.0097 | Cytoplasm                  | enzyme |
| PPA1    | pyrophosphatase (inorganic) 1                                                                                            | 1.46  | 0.0542 | Cytoplasm                  | enzyme |
| PPIC    | peptidylprolyl isomerase C (cyclophilin C)                                                                               | 1.52  | 0.0295 | Cytoplasm                  | enzyme |
| PPID    | peptidylprolyl isomerase D                                                                                               | 1.68  | 0.0328 | Cytoplasm                  | enzyme |
| PPME1   | protein phosphatase methylesterase 1                                                                                     | -1.61 | 0.0527 | Unknown                    | enzyme |
| PRDX2   | peroxiredoxin 2                                                                                                          | 1.6   | 0.0350 | Cytoplasm                  | enzyme |
| PRMT1   | protein arginine methyltransferase 1                                                                                     | -2.9  | 0.0508 | Nucleus                    | enzyme |

|         |                                                                                            |       |        |                            |                     |
|---------|--------------------------------------------------------------------------------------------|-------|--------|----------------------------|---------------------|
| QTRT1   | queuine tRNA-ribosyltransferase 1                                                          | -2.43 | 0.0407 | Unknown                    | enzyme              |
| RAB11B  | RAB11B, member RAS oncogene family                                                         | -3.99 | 0.0234 | Cytoplasm<br>Plasma        | enzyme              |
| RAB40C  | RAB40C, member RAS oncogene family                                                         | -1.69 | 0.0334 | Membrane                   | enzyme              |
| RAC3    | ras-related C3 botulinum toxin substrate 3<br>(rho family, small GTP binding protein Rac3) | -3    | 0.0196 | Cytoplasm                  | enzyme              |
| RAD1    | RAD1 homolog (S. pombe)                                                                    | 2.22  | 0.0362 | Nucleus                    | enzyme              |
| RANBP2  | RAN binding protein 2                                                                      | 2.17  | 0.0173 | Nucleus                    | enzyme              |
| RECQL5  | RecQ protein-like 5                                                                        | -1.55 | 0.0143 | Nucleus<br>Plasma          | enzyme              |
| RHEB    | Ras homolog enriched in brain                                                              | -1.89 | 0.0148 | Membrane                   | enzyme              |
| RHOD    | ras homolog gene family, member D                                                          | -1.79 | 0.0257 | Cytoplasm                  | enzyme              |
| RHOT2   | ras homolog gene family, member T2                                                         | -1.6  | 0.0112 | Cytoplasm<br>Extracellular | enzyme              |
| RNASE1  | ribonuclease, RNase A family, 1 (pancreatic)                                               | -1.67 | 0.0516 | Space                      | enzyme              |
| SAR1A   | SAR1 homolog A (S. cerevisiae)                                                             | -1.78 | 0.0398 | Cytoplasm                  | enzyme              |
| SCD     | stearoyl-CoA desaturase (delta-9-desaturase)                                               | -2.02 | 0.0273 | Cytoplasm                  | enzyme              |
| SEPT9   | septin 9                                                                                   | -1.81 | 0.0379 | Cytoplasm                  | enzyme              |
| SIAH1   | seven in absentia homolog 1 (Drosophila)                                                   | 1.49  | 0.0472 | Nucleus                    | enzyme              |
| SMOX    | spermine oxidase                                                                           | -1.65 | 0.0148 | Cytoplasm                  | enzyme              |
| SPAST   | spastin                                                                                    | 2.51  | 0.0202 | Nucleus                    | enzyme              |
| SUCLA2  | succinate-CoA ligase, ADP-forming, beta<br>subunit                                         | 2.02  | 0.0193 | Cytoplasm                  | enzyme              |
| SUCLG2  | succinate-CoA ligase, GDP-forming, beta<br>subunit                                         | 2.15  | 0.0113 | Cytoplasm                  | enzyme              |
| SUMO1   | SMT3 suppressor of mif two 3 homolog 1 (S.<br>cerevisiae)                                  | 2.18  | 0.0445 | Nucleus                    | enzyme              |
| TARS    | threonyl-tRNA synthetase                                                                   | 1.64  | 0.0374 | Nucleus<br>Extracellular   | enzyme              |
| TGM4    | transglutaminase 4 (prostate)                                                              | -1.61 | 0.0484 | Space                      | enzyme              |
| TOP2B   | topoisomerase (DNA) II beta 180kDa                                                         | 2     | 0.0149 | Nucleus                    | enzyme              |
| TTLL3   | tubulin tyrosine ligase-like family, member 3                                              | -1.8  | 0.0212 | Unknown                    | enzyme              |
| TXNDC13 | thioredoxin domain containing 13                                                           | 1.57  | 0.0489 | Cytoplasm                  | enzyme              |
| UBA2    | ubiquitin-like modifier activating enzyme 2                                                | 1.77  | 0.0134 | Cytoplasm                  | enzyme              |
| UBA3    | ubiquitin-like modifier activating enzyme 3                                                | 1.99  | 0.0336 | Cytoplasm                  | enzyme              |
| UBE2D1  | ubiquitin-conjugating enzyme E2D 1 (UBC4/5<br>homolog, yeast)                              | 2.67  | 0.0104 | Cytoplasm                  | enzyme              |
| UBE2D4  | ubiquitin-conjugating enzyme E2D 4<br>(putative)                                           | -1.48 | 0.0387 | Unknown                    | enzyme              |
| UBE2G1  | ubiquitin-conjugating enzyme E2G 1 (UBC7<br>homolog, yeast)                                | 1.97  | 0.0523 | Cytoplasm                  | enzyme              |
| UBE2G2  | ubiquitin-conjugating enzyme E2G 2 (UBC7<br>homolog, yeast)                                | -2.42 | 0.0088 | Cytoplasm                  | enzyme              |
| UBE2I   | ubiquitin-conjugating enzyme E2I (UBC9<br>homolog, yeast)                                  | -2.11 | 0.0303 | Nucleus                    | enzyme              |
| UBE2J1  | ubiquitin-conjugating enzyme E2, J1 (UBC6<br>homolog, yeast)                               | 1.87  | 0.0311 | Cytoplasm                  | enzyme              |
| UBE2S   | ubiquitin-conjugating enzyme E2S                                                           | -1.81 | 0.0270 | Unknown                    | enzyme              |
| VARS    | valyl-tRNA synthetase                                                                      | -5.1  | 0.0232 | Cytoplasm                  | enzyme              |
| WARS    | tryptophanyl-tRNA synthetase                                                               | -1.64 | 0.0431 | Cytoplasm                  | enzyme              |
| WWOX    | WW domain containing oxidoreductase                                                        | -1.56 | 0.0383 | Cytoplasm                  | enzyme              |
| WWP1    | WW domain containing E3 ubiquitin protein<br>ligase 1                                      | 2.34  | 0.0216 | Cytoplasm                  | enzyme              |
| CELSR1  | cadherin, EGF LAG seven-pass G-type<br>receptor 1 (flamingo homolog, Drosophila)           | -1.53 | 0.0405 | Plasma<br>Membrane         | coupled<br>receptor |
| CELSR2  | cadherin, EGF LAG seven-pass G-type                                                        | -1.48 | 0.0446 | Plasma                     | G-protein           |

|                            |                                                                     |       |        |                     |                            |
|----------------------------|---------------------------------------------------------------------|-------|--------|---------------------|----------------------------|
|                            | receptor 2 (flamingo homolog, Drosophila)                           |       |        | Membrane            | coupled receptor           |
| GLP1R                      | glucagon-like peptide 1 receptor                                    | -1.67 | 0.0217 | Plasma Membrane     | G-protein coupled receptor |
| GNRHR                      | gonadotropin-releasing hormone receptor                             | -2.39 | 0.0396 | Plasma Membrane     | G-protein coupled receptor |
| GPR27                      | G protein-coupled receptor 27                                       | -1.8  | 0.0350 | Plasma Membrane     | G-protein coupled receptor |
| GRPR                       | gastrin-releasing peptide receptor                                  | -1.58 | 0.0292 | Plasma Membrane     | G-protein coupled receptor |
| HRH3                       | histamine receptor H3                                               | -2.21 | 0.0496 | Plasma Membrane     | G-protein coupled receptor |
| LANCL1                     | LanC lantibiotic synthetase component C-like 1 (bacterial)          | -1.67 | 0.0364 | Plasma Membrane     | G-protein coupled receptor |
| LGR4                       | leucine-rich repeat-containing G protein-coupled receptor 4         | 3.93  | 0.0428 | Plasma Membrane     | G-protein coupled receptor |
| OGFR                       | opioid growth factor receptor                                       | -1.99 | 0.0304 | Plasma Membrane     | G-protein coupled receptor |
| OR7C1                      | olfactory receptor, family 7, subfamily C, member 1                 | -2.03 | 0.0225 | Plasma Membrane     | G-protein coupled receptor |
| PTGDR                      | prostaglandin D2 receptor (DP)                                      | -2.05 | 0.0419 | Plasma Membrane     | G-protein coupled receptor |
| RHO                        | rhodopsin                                                           | -1.73 | 0.0473 | Plasma Membrane     | G-protein coupled receptor |
| TBXA2R                     | thromboxane A2 receptor                                             | -1.68 | 0.0270 | Plasma Membrane     | G-protein coupled receptor |
| AREG                       | amphiregulin                                                        | -3.02 | 0.0420 | Extracellular Space | growth factor              |
| BMP2                       | bone morphogenetic protein 2                                        | -1.62 | 0.0365 | Extracellular Space | growth factor              |
| FGF6                       | fibroblast growth factor 6                                          | -1.65 | 0.0351 | Extracellular Space | growth factor              |
| HDGF                       | hepatoma-derived growth factor (high-mobility group protein 1-like) | -2.41 | 0.0404 | Extracellular Space | growth factor              |
| LTBP4                      | latent transforming growth factor beta binding protein 4            | -2.29 | 0.0463 | Extracellular Space | growth factor              |
| NRG2<br>(includes EG:9542) | neuregulin 2                                                        | 1.5   | 0.0445 | Extracellular Space | growth factor              |
| TYMP                       | thymidine phosphorylase                                             | -1.73 | 0.0434 | Extracellular Space | growth factor              |
| ANXA7                      | annexin A7                                                          | 1.87  | 0.0328 | Plasma Membrane     | ion channel                |
| CLCN7                      | chloride channel 7                                                  | -1.5  | 0.0351 | Plasma Membrane     | ion channel                |

|         |                                                                                                                |       |        |           |             |
|---------|----------------------------------------------------------------------------------------------------------------|-------|--------|-----------|-------------|
| GPM6A   | glycoprotein M6A                                                                                               | 2.13  | 0.0499 | Plasma    | ion channel |
| GRIN1   | glutamate receptor, ionotropic, N-methyl D-aspartate 1                                                         | -1.97 | 0.0389 | Membrane  | ion channel |
| KCNA4   | potassium voltage-gated channel, shaker-related subfamily, member 4                                            | -1.76 | 0.0226 | Plasma    | ion channel |
| KCNAB1  | potassium voltage-gated channel, shaker-related subfamily, beta member 1                                       | -1.51 | 0.0337 | Membrane  | ion channel |
| KCNN2   | potassium intermediate/small conductance calcium-activated channel, subfamily N, member 2                      | 2.54  | 0.0226 | Plasma    | ion channel |
| KCTD2   | potassium channel tetramerisation domain containing 2                                                          | -2.04 | 0.0114 | Membrane  | ion channel |
| MCOLN1  | mucolipin 1                                                                                                    | -1.71 | 0.0482 | Unknown   | ion channel |
| NOX1    | NADPH oxidase 1                                                                                                | -1.67 | 0.0213 | Cytoplasm | ion channel |
| TOMM40  | translocase of outer mitochondrial membrane 40 homolog (yeast)                                                 | -1.68 | 0.0358 | Cytoplasm | ion channel |
| TRPM2   | transient receptor potential cation channel, subfamily M, member 2                                             | -2.4  | 0.0283 | Plasma    | ion channel |
| VDAC3   | voltage-dependent anion channel 3                                                                              | -2.01 | 0.0380 | Membrane  | ion channel |
| ADRBK1  | adrenergic, beta, receptor kinase 1                                                                            | -2.1  | 0.0479 | Cytoplasm | kinase      |
| AGK     | acylglycerol kinase                                                                                            | 1.63  | 0.0493 | Cytoplasm | kinase      |
| AURKB   | aurora kinase B                                                                                                | 1.48  | 0.0399 | Nucleus   | kinase      |
| BAIAP2  | BAI1-associated protein 2                                                                                      | -1.68 | 0.0423 | Plasma    | kinase      |
| BRD2    | bromodomain containing 2                                                                                       | -1.83 | 0.0514 | Membrane  | kinase      |
| BUB1    | budding uninhibited by benzimidazoles 1 homolog (yeast)                                                        | -1.81 | 0.0485 | Nucleus   | kinase      |
| CAMK2B  | calcium/calmodulin-dependent protein kinase II beta                                                            | -1.56 | 0.0239 | Cytoplasm | kinase      |
| CAMK2G  | calcium/calmodulin-dependent protein kinase II gamma                                                           | -1.56 | 0.0490 | Cytoplasm | kinase      |
| CAMKK2  | calcium/calmodulin-dependent protein kinase 2, beta                                                            | -2.36 | 0.0459 | Cytoplasm | kinase      |
| CDC2    | cell division cycle 2, G1 to S and G2 to M                                                                     | 1.76  | 0.0514 | Nucleus   | kinase      |
| CDC2L2  | cell division cycle 2-like 2 (PITSLRE proteins)                                                                | -1.47 | 0.0528 | Nucleus   | kinase      |
| CDK2    | cyclin-dependent kinase 2                                                                                      | -1.81 | 0.0183 | Nucleus   | kinase      |
| CRKL    | v-crk sarcoma virus CT10 oncogene homolog (avian)-like                                                         | -2.25 | 0.0344 | Cytoplasm | kinase      |
| CSK     | c-src tyrosine kinase                                                                                          | -1.73 | 0.0331 | Cytoplasm | kinase      |
| DAPK3   | death-associated protein kinase 3                                                                              | -3.41 | 0.0335 | Cytoplasm | kinase      |
| DCK     | deoxycytidine kinase                                                                                           | 1.85  | 0.0374 | Nucleus   | kinase      |
| DMPK    | dystrophia myotonica-protein kinase                                                                            | -1.56 | 0.0461 | Cytoplasm | kinase      |
| EPHA1   | EPH receptor A1                                                                                                | -1.63 | 0.0539 | Plasma    | kinase      |
| ERBB2   | v-erb-b2 erythroblastic leukemia viral oncogene homolog 2, neuro/glioblastoma derived oncogene homolog (avian) | -1.56 | 0.0254 | Membrane  | kinase      |
| EXOSC10 | exosome component 10                                                                                           | 1.59  | 0.0353 | Nucleus   | kinase      |
| FASTK   | Fas-activated serine/threonine kinase                                                                          | -1.75 | 0.0483 | Cytoplasm | kinase      |
| FRAP1   | FK506 binding protein 12-rapamycin associated protein 1                                                        | -1.6  | 0.0250 | Nucleus   | kinase      |
| GUCY2D  | guanylate cyclase 2D, membrane (retina-specific)                                                               | -1.71 | 0.0234 | Plasma    | kinase      |



|                          |                                                                                            |       |        |                     |        |
|--------------------------|--------------------------------------------------------------------------------------------|-------|--------|---------------------|--------|
| HK2                      | hexokinase 2                                                                               | -1.57 | 0.0464 | Cytoplasm           | kinase |
| IHPK1                    | inositol hexakisphosphate kinase 1                                                         | -1.53 | 0.0386 | Cytoplasm           | kinase |
| IKBKG                    | inhibitor of kappa light polypeptide gene enhancer in B-cells, kinase gamma                | -1.63 | 0.0200 | Nucleus             | kinase |
| MAP2K7                   | mitogen-activated protein kinase kinase 7                                                  | -1.56 | 0.0543 | Cytoplasm           | kinase |
| MAP3K3                   | mitogen-activated protein kinase kinase 3                                                  | -1.5  | 0.0226 | Cytoplasm           | kinase |
| MAP4K3                   | mitogen-activated protein kinase kinase kinase 3                                           | 3.73  | 0.0133 | Unknown             | kinase |
| MAPK14                   | mitogen-activated protein kinase 14                                                        | -2.59 | 0.0283 | Cytoplasm           | kinase |
| MARK2                    | MAP/microtubule affinity-regulating kinase 2                                               | -1.56 | 0.0475 | Cytoplasm           | kinase |
| MARK3                    | MAP/microtubule affinity-regulating kinase 3                                               | 1.99  | 0.0303 | Cytoplasm           | kinase |
| MVK                      | mevalonate kinase                                                                          | -1.61 | 0.0096 | Cytoplasm           | kinase |
| NRBP1                    | nuclear receptor binding protein 1                                                         | -1.64 | 0.0467 | Nucleus<br>Plasma   | kinase |
| NTRK2                    | neurotrophic tyrosine kinase, receptor, type 2                                             | 1.8   | 0.0377 | Membrane            | kinase |
| PFKL                     | phosphofructokinase, liver                                                                 | -2.95 | 0.0308 | Cytoplasm           | kinase |
| PHKB                     | phosphorylase kinase, beta                                                                 | 1.53  | 0.0361 | Cytoplasm           | kinase |
| PIP5K3                   | phosphatidylinositol-3-phosphate/phosphatidylinositol 5-kinase, type III                   | 1.77  | 0.0517 | Cytoplasm           | kinase |
| PKMYT1                   | protein kinase, membrane associated tyrosine/threonine 1                                   | -1.57 | 0.0375 | Cytoplasm           | kinase |
| PRKAB2                   | protein kinase, AMP-activated, beta 2 non-catalytic subunit                                | -2.11 | 0.0471 | Unknown             | kinase |
| PRKAR1A                  | protein kinase, cAMP-dependent, regulatory, type I, alpha (tissue specific extinguisher 1) | 2.03  | 0.0043 | Cytoplasm           | kinase |
| PRKD2                    | protein kinase D2                                                                          | -1.7  | 0.0056 | Cytoplasm           | kinase |
| PRKD3                    | protein kinase D3                                                                          | 1.93  | 0.0347 | Unknown             | kinase |
| PRKDC                    | protein kinase, DNA-activated, catalytic polypeptide                                       | 2.6   | 0.0263 | Nucleus             | kinase |
| PRPF4B                   | PRP4 pre-mRNA processing factor 4 homolog B (yeast)                                        | 1.95  | 0.0510 | Nucleus             | kinase |
| PRPS2                    | phosphoribosyl pyrophosphate synthetase 2                                                  | 1.96  | 0.0501 | Unknown             | kinase |
| RAF1                     | v-raf-1 murine leukemia viral oncogene homolog 1                                           | -1.64 | 0.0519 | Cytoplasm           | kinase |
| ROCK1                    | Rho-associated, coiled-coil containing protein kinase 1                                    | 1.77  | 0.0469 | Cytoplasm           | kinase |
| RP6-213H19.1             | serine/threonine protein kinase MST4                                                       | 1.8   | 0.0271 | Nucleus             | kinase |
| RPS6KA2                  | ribosomal protein S6 kinase, 90kDa, polypeptide 2                                          | -1.6  | 0.0310 | Nucleus             | kinase |
| RPS6KB1                  | ribosomal protein S6 kinase, 70kDa, polypeptide 1                                          | -1.74 | 0.0277 | Cytoplasm           | kinase |
| SLK                      | STE20-like kinase (yeast)                                                                  | 2.19  | 0.0418 | Nucleus             | kinase |
| SRC                      | v-src sarcoma (Schmidt-Ruppin A-2) viral oncogene homolog (avian)                          | -1.5  | 0.0328 | Cytoplasm           | kinase |
| STK11                    | serine/threonine kinase 11                                                                 | -2.61 | 0.0106 | Cytoplasm           | kinase |
| TAOK2 (includes EG:9344) | TAO kinase 2                                                                               | -1.72 | 0.0420 | Cytoplasm<br>Plasma | kinase |
| TGFBR1                   | transforming growth factor, beta receptor 1                                                | -1.81 | 0.0543 | Membrane            | kinase |
| TK2                      | thymidine kinase 2, mitochondrial                                                          | -1.76 | 0.0355 | Cytoplasm           | kinase |
| TLK1                     | tousled-like kinase 1                                                                      | 1.48  | 0.0237 | Cytoplasm           | kinase |
| TMEM134                  | transmembrane protein 134                                                                  | -2.53 | 0.0430 | Unknown             | kinase |
| VRK1                     | vaccinia related kinase 1                                                                  | 1.75  | 0.0314 | Nucleus             | kinase |

|                  |                                                                                                    |       |        |               |                                   |
|------------------|----------------------------------------------------------------------------------------------------|-------|--------|---------------|-----------------------------------|
| ESRRA            | estrogen-related receptor alpha                                                                    | -2.09 | 0.0204 | Nucleus       | ligand-dependent nuclear receptor |
| NR2F2            | nuclear receptor subfamily 2, group F, member 2                                                    | 2.44  | 0.0450 | Nucleus       | ligand-dependent nuclear receptor |
| NR2F6            | nuclear receptor subfamily 2, group F, member 6                                                    | -3.15 | 0.0381 | Nucleus       | ligand-dependent nuclear receptor |
| NR6A1            | nuclear receptor subfamily 6, group A, member 1                                                    | -1.54 | 0.0381 | Nucleus       | ligand-dependent nuclear receptor |
| THRA             | thyroid hormone receptor, alpha (erythroblastic leukemia viral (v-erb-a) oncogene homolog, avian)  | -2.36 | 0.0280 | Nucleus       | ligand-dependent nuclear receptor |
| THRB             | thyroid hormone receptor, beta (erythroblastic leukemia viral (v-erb-a) oncogene homolog 2, avian) | -1.52 | 0.0453 | Nucleus       | ligand-dependent nuclear receptor |
| AAMP             | angio-associated, migratory cell protein                                                           | -2    | 0.0182 | Unknown       | other                             |
| ABCA11           | ATP-binding cassette, sub-family A (ABC1), member 11 (pseudogene)                                  | 1.73  | 0.0476 | Unknown       | other                             |
| ABR              | active BCR-related gene                                                                            | -2.81 | 0.0491 | Unknown       | other                             |
| ACAP2            | ArfGAP with coiled-coil, ankyrin repeat and PH domains 2                                           | 2.02  | 0.0185 | Nucleus       | other                             |
| ACRV1            | acrosomal vesicle protein 1                                                                        | -1.55 | 0.0398 | Cytoplasm     | other                             |
| ACTG2            |                                                                                                    |       |        |               |                                   |
| (includes EG:72) |                                                                                                    |       |        |               |                                   |
| ACTL6A           | actin, gamma 2, smooth muscle, enteric actin-like 6A                                               | -1.46 | 0.0516 | Cytoplasm     | other                             |
| ACTR3            | ARP3 actin-related protein 3 homolog (yeast)                                                       | 2.37  | 0.0313 | Membrane      | other                             |
| ADAP1            | ArfGAP with dual PH domains 1                                                                      | -2.13 | 0.0172 | Nucleus       | other                             |
| ADO              | 2-aminoethanethiol (cysteamine) dioxygenase                                                        | 1.5   | 0.0219 | Unknown       | other                             |
| AGRN             | agrin                                                                                              | -2.05 | 0.0423 | Plasma        | other                             |
| AHDC1            | AT hook, DNA binding motif, containing 1                                                           | -1.66 | 0.0130 | Membrane      | other                             |
| ALMS1            | Alstrom syndrome 1                                                                                 | 1.6   | 0.0336 | Unknown       | other                             |
| ANK3             | ankyrin 3, node of Ranvier (ankyrin G) acidic (leucine-rich) nuclear phosphoprotein                | 2.06  | 0.0190 | Cytoplasm     | other                             |
| ANP32E           | 32 family, member E                                                                                | 2.24  | 0.0163 | Membrane      | other                             |
| APAF1            | apoptotic peptidase activating factor 1                                                            | 1.75  | 0.0245 | Nucleus       | other                             |
| APBB2            | amyloid beta (A4) precursor protein-binding, family B, member 2                                    | -1.86 | 0.0380 | Cytoplasm     | other                             |
| APLP1            | amyloid beta (A4) precursor-like protein 1                                                         | -1.76 | 0.0248 | Extracellular | other                             |
| APPL2            | adaptor protein, phosphotyrosine interaction, PH domain and leucine zipper containing 2            | 1.46  | 0.0368 | Space         | other                             |
| ARHGAP1          | Rho GTPase activating protein 1                                                                    | -4.68 | 0.0532 | Cytoplasm     | other                             |
| ARHGDI           | Rho GDP dissociation inhibitor (GDI) alpha                                                         | -1.67 | 0.0253 | Cytoplasm     | other                             |

|                      |                                                                                                 |       |        |               |       |
|----------------------|-------------------------------------------------------------------------------------------------|-------|--------|---------------|-------|
|                      | Rho guanine nucleotide exchange factor (GEF)                                                    |       |        |               |       |
| ARHGEF17             | 17                                                                                              | -1.59 | 0.0520 | Cytoplasm     | other |
| ARMC1                | armadillo repeat containing 1                                                                   | 2.27  | 0.0246 | Unknown       | other |
| ARVCF                | armadillo repeat gene deletes in velocardiofacial syndrome                                      | -1.96 | 0.0242 | Plasma        |       |
| ASPHD1               |                                                                                                 |       |        | Membrane      | other |
| (includes EG:253982) | aspartate beta-hydroxylase domain containing 1                                                  | -1.92 | 0.0378 | Unknown       | other |
| ATG2A                | ATG2 autophagy related 2 homolog A (S. cerevisiae)                                              | -1.78 | 0.0474 | Unknown       | other |
| ATMIN                | ATM interactor                                                                                  | 1.96  | 0.0297 | Nucleus       | other |
| ATPIF1               | ATPase inhibitory factor 1                                                                      | 2.48  | 0.0087 | Cytoplasm     | other |
| BAT2                 | HLA-B associated transcript 2                                                                   | -2.76 | 0.0208 | Cytoplasm     | other |
| BBS10                | Bardet-Biedl syndrome 10                                                                        | 1.96  | 0.0227 | Unknown       | other |
| BRMS1                | breast cancer metastasis suppressor 1 bromodomain and WD repeat domain containing 2             | -1.66 | 0.0343 | Unknown       | other |
| BRWD2                |                                                                                                 | 3.14  | 0.0190 | Unknown       | other |
| BSG                  | basigin (Ok blood group)                                                                        | -2.68 | 0.0380 | Plasma        |       |
| BTBD2                | BTB (POZ) domain containing 2                                                                   | -3.27 | 0.0246 | Membrane      | other |
| BTG3                 | BTG family, member 3                                                                            | 1.98  | 0.0434 | Cytoplasm     | other |
| C10ORF137            | chromosome 10 open reading frame 137                                                            | 1.69  | 0.0469 | Nucleus       | other |
| C11ORF24             | chromosome 11 open reading frame 24                                                             | 1.96  | 0.0195 | Unknown       | other |
| C12ORF47             | chromosome 12 open reading frame 47                                                             | 1.57  | 0.0351 | Space         | other |
| C12ORF49             | chromosome 12 open reading frame 49                                                             | -1.97 | 0.0533 | Unknown       | other |
| C14ORF104            | chromosome 14 open reading frame 104                                                            | 2.57  | 0.0486 | Unknown       | other |
| C14ORF108            | MU-2/AP1M2 domain containing, death-inducing                                                    | 1.98  | 0.0282 | Unknown       | other |
| C14ORF118            | chromosome 14 open reading frame 118                                                            | -1.5  | 0.0353 | Unknown       | other |
| C14ORF65             | chromosome 14 open reading frame 65                                                             | -1.6  | 0.0347 | Unknown       | other |
| C15ORF24             | chromosome 15 open reading frame 24                                                             | 1.75  | 0.0223 | Extracellular |       |
| C17ORF42             | chromosome 17 open reading frame 42                                                             | 1.5   | 0.0517 | Space         | other |
| C19ORF54             | chromosome 19 open reading frame 54                                                             | -1.62 | 0.0395 | Unknown       | other |
| C1ORF107             | chromosome 1 open reading frame 107                                                             | 1.96  | 0.0186 | Unknown       | other |
| C1ORF144             | chromosome 1 open reading frame 144                                                             | -1.79 | 0.0259 | Nucleus       | other |
| C20ORF27             | chromosome 20 open reading frame 27                                                             | -2.3  | 0.0193 | Unknown       | other |
| C21ORF45             | chromosome 21 open reading frame 45                                                             | 1.63  | 0.0479 | Unknown       | other |
| C21ORF66             | chromosome 21 open reading frame 66                                                             | -1.57 | 0.0447 | Nucleus       | other |
| C5ORF22              | chromosome 5 open reading frame 22                                                              | 1.82  | 0.0171 | Unknown       | other |
| C5ORF4               | chromosome 5 open reading frame 4                                                               | -1.6  | 0.0159 | Unknown       | other |
| C5ORF44              | chromosome 5 open reading frame 44                                                              | 2.37  | 0.0405 | Unknown       | other |
| C6ORF106             | chromosome 6 open reading frame 106                                                             | -2.19 | 0.0393 | Unknown       | other |
| C6ORF120             | chromosome 6 open reading frame 120                                                             | 1.79  | 0.0413 | Unknown       | other |
| C7ORF64              | chromosome 7 open reading frame 64                                                              | 3.12  | 0.0361 | Unknown       | other |
| C9ORF7               | chromosome 9 open reading frame 7                                                               | -1.93 | 0.0130 | Unknown       | other |
| C9ORF82              | chromosome 9 open reading frame 82                                                              | 1.69  | 0.0244 | Unknown       | other |
| CALM3                | calmodulin 3 (phosphorylase kinase, delta) capping protein (actin filament) muscle Z-line, beta | -1.54 | 0.0284 | Plasma        |       |
| CAPZB                | caspase recruitment domain family, member 9                                                     | -2.24 | 0.0199 | Membrane      | other |
| CARD9                | chromobox homolog 1 (HP1 beta homolog Drosophila )                                              | -1.81 | 0.0453 | Cytoplasm     | other |
| CBX1                 | coiled-coil domain containing 101                                                               | 1.69  | 0.0244 | Unknown       | other |
| CCDC101              |                                                                                                 | -1.64 | 0.0374 | Nucleus       | other |

|                               |                                                                                                            |       |        |                          |       |
|-------------------------------|------------------------------------------------------------------------------------------------------------|-------|--------|--------------------------|-------|
| CCDC21                        | coiled-coil domain containing 21                                                                           | -1.86 | 0.0411 | Unknown                  | other |
| CCDC59                        | coiled-coil domain containing 59                                                                           | 1.93  | 0.0280 | Unknown                  | other |
| CCDC64                        | coiled-coil domain containing 64                                                                           | -1.81 | 0.0530 | Unknown                  | other |
| CCDC91                        | coiled-coil domain containing 91                                                                           | 1.89  | 0.0367 | Unknown                  | other |
| CCHCR1                        | coiled-coil alpha-helical rod protein 1                                                                    | -1.81 | 0.0206 | Cytoplasm<br>Plasma      | other |
| CD48                          | CD48 molecule                                                                                              | -2.16 | 0.0397 | Membrane                 | other |
| CDC5L                         | CDC5 cell division cycle 5-like ( <i>S. pombe</i> )<br>cyclin-dependent kinase inhibitor 1B (p27,<br>Kip1) | -1.55 | 0.0432 | Nucleus                  | other |
| CDKN1B                        | cyclin-dependent kinase inhibitor 1C (p57,<br>Kip2)                                                        | 2.96  | 0.0322 | Nucleus                  | other |
| CDKN1C                        | centromere protein M                                                                                       | 1.56  | 0.0427 | Nucleus                  | other |
| CENPM                         | centromere protein N                                                                                       | -1.57 | 0.0409 | Cytoplasm                | other |
| CENPN                         | centromere protein N                                                                                       | 1.59  | 0.0389 | Unknown                  | other |
| CEP27                         | centrosomal protein 27kDa                                                                                  | 2.28  | 0.0082 | Cytoplasm                | other |
| CEP57                         | centrosomal protein 57kDa                                                                                  | 2.52  | 0.0319 | Cytoplasm                | other |
| CETN3                         | centrin, EF-hand protein, 3 (CDC31 homolog,<br>yeast)                                                      | 2.27  | 0.0088 | Nucleus                  | other |
| CGGBP1                        | CGG triplet repeat binding protein 1                                                                       | -1.53 | 0.0395 | Nucleus                  | other |
| CHMP2A                        | chromatin modifying protein 2A                                                                             | 1.56  | 0.0399 | Cytoplasm                | other |
| CHMP2B                        | chromatin modifying protein 2B                                                                             | 2.38  | 0.0091 | Cytoplasm                | other |
| CHN1<br>(includes<br>EG:1123) | chimerin (chimaerin) 1                                                                                     | -1.56 | 0.0430 | Cytoplasm<br>Plasma      | other |
| CHODL                         | chondrolectin                                                                                              | -1.5  | 0.0101 | Membrane                 | other |
| CIDEC                         | cell death-inducing DFFA-like effector c                                                                   | -1.47 | 0.0510 | Cytoplasm                | other |
| CISH                          | cytokine inducible SH2-containing protein                                                                  | -1.7  | 0.0463 | Cytoplasm                | other |
| CKAP2                         | cytoskeleton associated protein 2                                                                          | 1.86  | 0.0403 | Cytoplasm                | other |
| CLN6                          | ceroid-lipofuscinosis, neuronal 6, late<br>infantile, variant                                              | -1.67 | 0.0409 | Cytoplasm<br>Plasma      | other |
| CLPTM1                        | cleft lip and palate associated<br>transmembrane protein 1                                                 | -7.87 | 0.0099 | Membrane<br>Plasma       | other |
| CNIH                          | cornichon homolog ( <i>Drosophila</i> )                                                                    | 1.98  | 0.0471 | Membrane<br>Plasma       | other |
| CNIH4                         | cornichon homolog 4 ( <i>Drosophila</i> )                                                                  | 3.01  | 0.0049 | Membrane                 | other |
| CNNM3                         | cyclin M3                                                                                                  | -1.85 | 0.0226 | Unknown                  | other |
| COL4A3                        | collagen, type IV, alpha 3 (Goodpasture<br>antigen)                                                        | -1.99 | 0.0145 | Space<br>Extracellular   | other |
| COL5A2                        | collagen, type V, alpha 2                                                                                  | 1.54  | 0.0383 | Space<br>Extracellular   | other |
| COL9A3                        | collagen, type IX, alpha 3                                                                                 | 1.51  | 0.0359 | Space                    | other |
| COMMD8                        | COMM domain containing 8                                                                                   | 1.67  | 0.0508 | Unknown                  | other |
| COPS8                         | COP9 constitutive photomorphogenic<br>homolog subunit 8 ( <i>Arabidopsis</i> )                             | 1.95  | 0.0403 | Cytoplasm                | other |
| CORO1B                        | coronin, actin binding protein, 1B                                                                         | -1.9  | 0.0172 | Cytoplasm                | other |
| CPSF6                         | cleavage and polyadenylation specific factor<br>6, 68kDa                                                   | 1.54  | 0.0523 | Nucleus                  | other |
| CSDC2                         | cold shock domain containing C2, RNA<br>binding                                                            | -1.89 | 0.0470 | Cytoplasm                | other |
| CSRP2                         | cysteine and glycine-rich protein 2                                                                        | 1.58  | 0.0183 | Nucleus<br>Extracellular | other |
| CST2                          | cystatin SA                                                                                                | -1.82 | 0.0424 | Space                    | other |
| CTDSPL                        | CTD (carboxy-terminal domain, RNA<br>polymerase II, polypeptide A) small                                   | 1.84  | 0.0520 | Nucleus                  | other |

|                               |                                                                                    |       |        |                          |       |
|-------------------------------|------------------------------------------------------------------------------------|-------|--------|--------------------------|-------|
|                               | phosphatase-like                                                                   |       |        |                          |       |
| CTNNA1                        | catenin (cadherin-associated protein), alpha 1, 102kDa                             | 1.73  | 0.0296 | Plasma<br>Membrane       | other |
| CUL4A                         | cullin 4A                                                                          | 2     | 0.0164 | Nucleus                  | other |
| CUL7<br>(includes<br>EG:9820) | cullin 7                                                                           | -1.83 | 0.0215 | Cytoplasm                | other |
| DAAM2                         | dishevelled associated activator of morphogenesis 2                                | -1.55 | 0.0084 | Unknown                  | other |
| DCTN5                         | dynactin 5 (p25)                                                                   | -2.12 | 0.0412 | Unknown                  | other |
| DEDD                          | death effector domain containing                                                   | -1.45 | 0.0481 | Nucleus                  | other |
| DENR<br>(includes<br>EG:8562) | density-regulated protein                                                          | 2.08  | 0.0302 | Unknown                  | other |
| DGCR14                        | DiGeorge syndrome critical region gene 14                                          | -1.62 | 0.0526 | Nucleus<br>Plasma        | other |
| DGCR2                         | DiGeorge syndrome critical region gene 2                                           | -1.76 | 0.0277 | Membrane                 | other |
| DKFZP434A062                  | DKFZP434A062 protein                                                               | -1.62 | 0.0408 | Unknown                  | other |
| DKFZP564C196                  | DKFZP564C196 protein                                                               | -1.73 | 0.0100 | Unknown<br>Extracellular | other |
| DLK2                          | delta-like 2 homolog (Drosophila)                                                  | -1.67 | 0.0352 | Space                    | other |
| DMWD                          | dystrophia myotonica, WD repeat containing                                         | -1.76 | 0.0195 | Nucleus                  | other |
| DMXL1                         | Dmx-like 1                                                                         | 2.38  | 0.0422 | Unknown                  | other |
| DMXL2                         | Dmx-like 2                                                                         | 1.83  | 0.0263 | Cytoplasm                | other |
| DNAJA1                        | DnaJ (Hsp40) homolog, subfamily A, member 1                                        | 1.76  | 0.0448 | Nucleus                  | other |
| DNAJB9                        | DnaJ (Hsp40) homolog, subfamily B, member 9                                        | 2.35  | 0.0065 | Nucleus<br>Plasma        | other |
| DSP                           | desmoplakin                                                                        | 1.47  | 0.0478 | Membrane                 | other |
| DTL                           | denticleless homolog (Drosophila)                                                  | 1.51  | 0.0321 | Nucleus                  | other |
| DUS2L                         | dihydrouridine synthase 2-like, SMM1 homolog ( <i>S. cerevisiae</i> )              | -1.46 | 0.0244 | Cytoplasm                | other |
| DUS4L                         | dihydrouridine synthase 4-like ( <i>S. cerevisiae</i> )                            | 1.79  | 0.0283 | Unknown                  | other |
| E2F8                          | E2F transcription factor 8                                                         | 2.04  | 0.0494 | Nucleus<br>Plasma        | other |
| EFNB2                         | ephrin-B2                                                                          | 1.9   | 0.0328 | Membrane                 | other |
| EHBP1L1                       | EH domain binding protein 1-like 1                                                 | -1.76 | 0.0523 | Cytoplasm                | other |
| EI24                          | etoposide induced 2.4 mRNA                                                         | 1.51  | 0.0432 | Unknown                  | other |
| ELAVL3                        | ELAV (embryonic lethal, abnormal vision, <i>Drosophila</i> )-like 3 (Hu antigen C) | -1.7  | 0.0279 | Nucleus<br>Extracellular | other |
| ELN                           | elastin                                                                            | -1.98 | 0.0374 | Space                    | other |
| ENOSF1                        | enolase superfamily member 1                                                       | 1.57  | 0.0286 | Unknown                  | other |
| ERGIC2                        | ERGIC and golgi 2                                                                  | 1.73  | 0.0236 | Unknown                  | other |
| FAIM                          | Fas apoptotic inhibitory molecule                                                  | 2.03  | 0.0144 | Cytoplasm<br>Plasma      | other |
| FAIM2                         | Fas apoptotic inhibitory molecule 2                                                | -1.81 | 0.0487 | Membrane                 | other |
| FAM115A                       | family with sequence similarity 115, member A                                      | 3.23  | 0.0423 | Unknown<br>Plasma        | other |
| FAM127A                       | family with sequence similarity 127, member A                                      | -1.74 | 0.0400 | Membrane                 | other |
| FAM20B                        | family with sequence similarity 20, member B                                       | 1.59  | 0.0483 | Extracellular            | other |

|           |                                                                                             |       |        | Space                                      |       |
|-----------|---------------------------------------------------------------------------------------------|-------|--------|--------------------------------------------|-------|
| FANCL     | Fanconi anemia, complementation group L                                                     | 2.08  | 0.0290 | Nucleus                                    | other |
| FASTKD3   | FAST kinase domains 3                                                                       | 1.74  | 0.0351 | Unknown                                    | other |
| FBXO41    | F-box protein 41                                                                            | -1.48 | 0.0395 | Unknown                                    | other |
| FBXO42    | F-box protein 42                                                                            | -1.94 | 0.0456 | Unknown                                    | other |
| FBXW12    | F-box and WD repeat domain containing 12                                                    | 2.38  | 0.0411 | Unknown                                    | other |
| FERMT2    | fermitin family homolog 2 (Drosophila)                                                      | -1.63 | 0.0409 | Cytoplasm                                  | other |
| FLJ12151  | hypothetical protein FLJ12151                                                               | 2.59  | 0.0329 | Unknown                                    | other |
| FLJ22167  | hypothetical protein FLJ22167                                                               | 1.77  | 0.0327 | Unknown                                    | other |
| FLJ35429  | hypothetical protein FLJ35429                                                               | 2.27  | 0.0393 | Unknown                                    | other |
|           |                                                                                             |       |        | Plasma                                     |       |
| FLOT1     | flotillin 1                                                                                 | -1.54 | 0.0542 | Membrane                                   | other |
| FNDC3A    | fibronectin type III domain containing 3A<br>FUS interacting protein (serine/arginine-rich) | 1.68  | 0.0508 | Unknown                                    | other |
| FUSIP1    | 1                                                                                           | 2     | 0.0159 | Nucleus                                    | other |
| GARNL1    | GTPase activating Rap/RanGAP domain-like 1                                                  | 2.35  | 0.0132 | Cytoplasm                                  | other |
| GAS2      | growth arrest-specific 2                                                                    | 2.04  | 0.0373 | Cytoplasm                                  | other |
|           |                                                                                             |       |        | Plasma                                     |       |
| GBAS      | glioblastoma amplified sequence                                                             | 2.18  | 0.0085 | Membrane                                   | other |
|           |                                                                                             |       |        | Extracellular                              |       |
| GIP       | gastric inhibitory polypeptide<br>G protein-coupled receptor kinase interacting             | -1.5  | 0.0370 | Space                                      | other |
| GIT1      | ArfGAP 1<br>glioma tumor suppressor candidate region                                        | -2.41 | 0.0098 | Nucleus                                    | other |
| GLTSCR1   | gene 1                                                                                      | -1.7  | 0.0233 | Unknown                                    | other |
| GORASP2   | golgi reassembly stacking protein 2, 55kDa                                                  | 1.49  | 0.0519 | Cytoplasm                                  | other |
| GPN3      | GPN-loop GTPase 3                                                                           | 1.77  | 0.0475 | Unknown                                    | other |
| GPR137    | G protein-coupled receptor 137                                                              | -1.85 | 0.0169 | Unknown                                    | other |
|           |                                                                                             |       |        | Plasma                                     |       |
| GRIP2     | glutamate receptor interacting protein 2                                                    | -1.62 | 0.0412 | Membrane                                   | other |
| GRSF1     | G-rich RNA sequence binding factor 1                                                        | 1.75  | 0.0464 | Cytoplasm                                  | other |
| GTPBP4    | GTP binding protein 4                                                                       | 2.03  | 0.0282 | Nucleus                                    | other |
| H3F3A     | (includes                                                                                   |       |        |                                            |       |
| EG:3020)  | H3 histone, family 3A                                                                       | 1.66  | 0.0336 | Nucleus                                    | other |
| HIP1      | huntingtin interacting protein 1                                                            | -1.64 | 0.0470 | Cytoplasm                                  | other |
| HIST1H1D  | (includes                                                                                   |       |        |                                            |       |
| EG:3007)  | histone cluster 1, H1d                                                                      | -1.55 | 0.0474 | Nucleus                                    | other |
| HIST1H3E  | histone cluster 1, H3e                                                                      | -1.66 | 0.0411 | Unknown                                    | other |
|           |                                                                                             |       |        | high mobility group nucleosomal binding    |       |
| HMGN3     | domain 3                                                                                    | 1.57  | 0.0255 | Nucleus                                    | other |
| HNRNPA1   | heterogeneous nuclear ribonucleoprotein A1                                                  | 2.44  | 0.0244 | Nucleus                                    | other |
|           |                                                                                             |       |        | heterogeneous nuclear ribonucleoprotein    |       |
| HNRNPA2B1 | A2/B1                                                                                       | 1.6   | 0.0361 | Nucleus                                    | other |
|           |                                                                                             |       |        | heterogeneous nuclear ribonucleoprotein C  |       |
| HNRNPC    | (C1/C2)                                                                                     | -1.69 | 0.0178 | Nucleus                                    | other |
|           |                                                                                             |       |        | heterogeneous nuclear ribonucleoprotein H2 |       |
| HNRNPH2   | (H')                                                                                        | 2.35  | 0.0522 | Nucleus                                    | other |
|           |                                                                                             |       |        | heterogeneous nuclear ribonucleoprotein H3 |       |
| HNRNPH3   | (2H9)                                                                                       | 1.89  | 0.0204 | Nucleus                                    | other |
| HNRNPL    | heterogeneous nuclear ribonucleoprotein L                                                   | -1.78 | 0.0412 | Nucleus                                    | other |
|           |                                                                                             |       |        | Plasma                                     |       |
| HOMER3    | homer homolog 3 (Drosophila)                                                                | -2.36 | 0.0351 | Membrane                                   | other |
| HPS1      | Hermansky-Pudlak syndrome 1                                                                 | -1.85 | 0.0213 | Cytoplasm                                  | other |
| HSPC072   | HSPC072 protein                                                                             | -1.56 | 0.0510 | Unknown                                    | other |
| IFT57     | intraflagellar transport 57 homolog                                                         | 1.64  | 0.0257 | Cytoplasm                                  | other |

|                           |                                                                              |       |        |                          |       |
|---------------------------|------------------------------------------------------------------------------|-------|--------|--------------------------|-------|
|                           | (Chlamydomonas)                                                              |       |        |                          |       |
|                           | intraflagellar transport 74 homolog                                          |       |        |                          |       |
| IFT74                     | (Chlamydomonas)                                                              | 2.47  | 0.0167 | Unknown                  | other |
| ING4                      | inhibitor of growth family, member 4                                         | -1.56 | 0.0456 | Nucleus                  | other |
| INTS1                     | integrator complex subunit 1                                                 | -1.57 | 0.0163 | Nucleus                  | other |
| IQWD1                     | IQ motif and WD repeats 1                                                    | 1.84  | 0.0523 | Nucleus                  | other |
| IRS1                      | insulin receptor substrate 1                                                 | 2.19  | 0.0303 | Cytoplasm<br>Plasma      | other |
| ITGB5                     | integrin, beta 5                                                             | 2.6   | 0.0231 | Membrane                 | other |
| ITSN1                     | intersectin 1 (SH3 domain protein)                                           | -1.85 | 0.0540 | Cytoplasm                | other |
| IVNS1ABP                  | influenza virus NS1A binding protein                                         | 1.68  | 0.0320 | Nucleus                  | other |
| JMJD1B                    | jumonji domain containing 1B                                                 | 1.56  | 0.0500 | Nucleus<br>Extracellular | other |
| KIAA0100                  | KIAA0100                                                                     | -1.84 | 0.0536 | Space                    | other |
| KIAA0240                  | KIAA0240                                                                     | 2.52  | 0.0093 | Unknown                  | other |
| KIAA0284                  | KIAA0284                                                                     | -2.34 | 0.0382 | Unknown                  | other |
| KIAA0528                  | KIAA0528                                                                     | 1.96  | 0.0226 | Cytoplasm                | other |
| KIAA0562                  | KIAA0562                                                                     | 3.29  | 0.0223 | Unknown                  | other |
| KIAA0564                  | KIAA0564                                                                     | 1.51  | 0.0321 | Unknown                  | other |
| KIAA0776                  | KIAA0776                                                                     | 3.72  | 0.0406 | Unknown                  | other |
| KIAA1109                  | KIAA1109                                                                     | -1.7  | 0.0527 | Unknown                  | other |
| KIAA1609                  | KIAA1609                                                                     | -1.51 | 0.0272 | Unknown                  | other |
| KIF11                     | kinesin family member 11                                                     | 1.53  | 0.0375 | Nucleus                  | other |
| KIF14                     | kinesin family member 14                                                     | 2.45  | 0.0213 | Cytoplasm                | other |
| KLHDC10                   | kelch domain containing 10                                                   | 1.77  | 0.0459 | Unknown<br>Plasma        | other |
| KRIT1                     | KRIT1, ankyrin repeat containing                                             | 3.28  | 0.0313 | Membrane                 | other |
| KRT10                     | keratin 10                                                                   | 1.5   | 0.0407 | Cytoplasm                | other |
| LAPTM4B                   | lysosomal protein transmembrane 4 beta                                       | 1.56  | 0.0447 | Unknown                  | other |
| LIMCH1                    | LIM and calponin homology domains 1                                          | 1.54  | 0.0161 | Unknown                  | other |
| LL22NC03-75B3.6           | KIAA1644 protein                                                             | -1.56 | 0.0475 | Unknown                  | other |
| LOC100129361              | hypothetical protein LOC100129361 similar to Ig kappa chain V-I region HK102 | 1.53  | 0.0535 | Unknown                  | other |
| LOC652493                 | precursor                                                                    | -1.55 | 0.0428 | Unknown                  | other |
| LOC729580                 | hypothetical LOC729580                                                       | -2.07 | 0.0127 | Unknown                  | other |
| LOC90379                  | hypothetical protein BC002926                                                | -1.88 | 0.0192 | Unknown                  | other |
| LPPR2                     | lipid phosphate phosphatase-related protein type 2                           | -2.08 | 0.0091 | Unknown<br>Plasma        | other |
| LRP5                      | low density lipoprotein receptor-related protein 5                           | -1.67 | 0.0354 | Membrane<br>Plasma       | other |
| LRRC23                    | leucine rich repeat containing 23                                            | -1.79 | 0.0261 | Membrane                 | other |
| LRRC40                    | leucine rich repeat containing 40                                            | 2.11  | 0.0195 | Nucleus                  | other |
| LSG1                      | large subunit GTPase 1 homolog (S. cerevisiae)                               | 1.47  | 0.0377 | Cytoplasm                | other |
| LSM14A                    | LSM14A, SCD6 homolog A (S. cerevisiae)                                       | 1.74  | 0.0268 | Unknown                  | other |
| LSM8                      | LSM8 homolog, U6 small nuclear RNA associated (S. cerevisiae)                | 1.49  | 0.0402 | Nucleus                  | other |
| MAGEA4 (includes EG:4103) | melanoma antigen family A, 4                                                 | -1.86 | 0.0327 | Cytoplasm                | other |
| MAP4                      | microtubule-associated protein 4                                             | -1.95 | 0.0526 | Cytoplasm                | other |
| MAP7                      | microtubule-associated protein 7                                             | -1.84 | 0.0450 | Cytoplasm                | other |
| MARCKS                    | myristoylated alanine-rich protein kinase C                                  | 1.98  | 0.0392 | Plasma                   | other |

|                     | substrate                                                                                           |       |        | Membrane                   |       |
|---------------------|-----------------------------------------------------------------------------------------------------|-------|--------|----------------------------|-------|
| (includes EG:4082)  |                                                                                                     |       |        |                            |       |
| MBD3                |                                                                                                     |       |        |                            |       |
| (includes EG:53615) |                                                                                                     |       |        |                            |       |
| MBD3                | methyl-CpG binding domain protein 3                                                                 | -1.8  | 0.0388 | Nucleus                    | other |
| (includes EG:53615) |                                                                                                     |       |        |                            |       |
| MBOAT7              | methyl-CpG binding domain protein 3 membrane bound O-acyltransferase domain containing 7            | -1.77 | 0.0263 | Nucleus<br>Plasma          | other |
| MCF2L               | MCF.2 cell line derived transforming sequence-like                                                  | -1.67 | 0.0422 | Membrane                   | other |
| MCM3AP              | minichromosome maintenance complex component 3 associated protein                                   | -1.6  | 0.0229 | Cytoplasm                  | other |
| MED13L              | mediator complex subunit 13-like                                                                    | -2.1  | 0.0464 | Nucleus                    | other |
| MEMO1               |                                                                                                     | 2.15  | 0.0416 | Nucleus                    | other |
| (includes EG:51072) |                                                                                                     |       |        |                            |       |
| METRNL              | mediator of cell motility 1                                                                         | 2.06  | 0.0322 | Unknown<br>Extracellular   | other |
| METTL7A             | meteorin, glial cell differentiation regulator                                                      | -2.48 | 0.0158 | Space                      | other |
| MEX3D               | methyltransferase like 7A                                                                           | 2.1   | 0.0442 | Unknown                    | other |
| MGC5457             | mex-3 homolog D (C. elegans)                                                                        | -3.14 | 0.0214 | Unknown                    | other |
| MID2                | chromosome 1 open reading frame 217                                                                 | 1.46  | 0.0468 | Unknown                    | other |
| MIER2               | midline 2                                                                                           | -1.71 | 0.0509 | Cytoplasm                  | other |
| MINA                | mesoderm induction early response 1, family member 2                                                | -1.58 | 0.0328 | Unknown                    | other |
| MLANA               | MYC induced nuclear antigen                                                                         | 1.87  | 0.0333 | Nucleus<br>Plasma          | other |
| MLF2                | melan-A                                                                                             | -1.54 | 0.0498 | Membrane                   | other |
| MPZL1               | myeloid leukemia factor 2                                                                           | -1.55 | 0.0401 | Nucleus<br>Plasma          | other |
| MRCL3               | myelin protein zero-like 1                                                                          | -1.56 | 0.0505 | Membrane                   | other |
| MTDH                | myosin regulatory light chain MRCL3                                                                 | 1.82  | 0.0322 | Unknown                    | other |
| MYBPC1              | metadherin                                                                                          | 1.74  | 0.0318 | Cytoplasm                  | other |
| MYH14               | myosin binding protein C, slow type                                                                 | 1.64  | 0.0337 | Cytoplasm<br>Extracellular | other |
| MYO1C               | myosin, heavy chain 14                                                                              | -1.68 | 0.0450 | Space                      | other |
| N-PAC               | myosin IC                                                                                           | -2.04 | 0.0493 | Cytoplasm                  | other |
| NBN                 | cytokine-like nuclear factor n-pac                                                                  | -2.83 | 0.0425 | Unknown                    | other |
| NCAPG               | nibrin                                                                                              | 1.58  | 0.0476 | Nucleus                    | other |
| (includes EG:64151) |                                                                                                     |       |        |                            |       |
| NDC80               | non-SMC condensin I complex, subunit G NDC80 homolog, kinetochore complex component (S. cerevisiae) | 2.51  | 0.0148 | Nucleus                    | other |
| NELF                |                                                                                                     | 1.84  | 0.0267 | Nucleus<br>Extracellular   | other |
| NOL7                | nasal embryonic LHRH factor                                                                         | -2.83 | 0.0316 | Space                      | other |
| NPLOC4              | nucleolar protein 7, 27kDa                                                                          | 1.89  | 0.0210 | Nucleus                    | other |
| NRGN                | nuclear protein localization 4 homolog (S. cerevisiae)                                              | -1.9  | 0.0395 | Nucleus                    | other |
| NUCB2               | neurogranin (protein kinase C substrate, RC3)                                                       | -1.88 | 0.0239 | Cytoplasm                  | other |
| NUP205              | nucleobindin 2                                                                                      | 1.7   | 0.0163 | Nucleus                    | other |
| OAZ2                | nucleoporin 205kDa                                                                                  | 1.55  | 0.0455 | Nucleus                    | other |
| (includes EG:4947)  |                                                                                                     |       |        |                            |       |
| OBSL1               | ornithine decarboxylase antizyme 2                                                                  | -2.31 | 0.0344 | Cytoplasm                  | other |
|                     | obscurin-like 1                                                                                     | 1.79  | 0.0296 | Unknown                    | other |



|                                    |                                                                             |       |        |                                     |       |
|------------------------------------|-----------------------------------------------------------------------------|-------|--------|-------------------------------------|-------|
| OGFOD2                             | 2-oxoglutarate and iron-dependent oxygenase domain containing 2             | -1.49 | 0.0186 | Unknown                             | other |
| OAI2                               | ORAI calcium release-activated calcium modulator 2                          | -1.58 | 0.0191 | Unknown                             | other |
| OTUB1                              | OTU domain, ubiquitin aldehyde binding 1                                    | -1.68 | 0.0451 | Unknown                             | other |
| PAK1IP1                            | PAK1 interacting protein 1                                                  | 1.81  | 0.0358 | Nucleus                             | other |
| PAQR3                              | progesterin and adipoQ receptor family member III                           | 2.39  | 0.0413 | Cytoplasm                           | other |
| PARC                               | p53-associated parkin-like cytoplasmic protein                              | -1.59 | 0.0439 | Cytoplasm<br>Plasma                 | other |
| PCDHAC2                            | protocadherin alpha subfamily C, 2                                          | 1.99  | 0.0511 | Membrane                            | other |
| PCDHGA3                            | protocadherin gamma subfamily A, 3                                          | -1.73 | 0.0316 | Unknown                             | other |
| PDLIM2                             | PDZ and LIM domain 2 (mystique)                                             | -1.92 | 0.0345 | Cytoplasm                           | other |
| PELI1                              | pellino homolog 1 (Drosophila)                                              | 2.15  | 0.0514 | Cytoplasm                           | other |
| PEX14                              | peroxisomal biogenesis factor 14                                            | -1.88 | 0.0116 | Cytoplasm                           | other |
| PEX16                              | peroxisomal biogenesis factor 16                                            | -1.79 | 0.0480 | Cytoplasm                           | other |
| PHTF2                              | putative homeodomain transcription factor 2                                 | 2.17  | 0.0128 | Cytoplasm                           | other |
| PIBF1                              | progesterone immunomodulatory binding factor 1                              | 2.55  | 0.0529 | Nucleus                             | other |
| PICALM                             | phosphatidylinositol binding clathrin assembly protein                      | -1.58 | 0.0168 | Cytoplasm<br>Plasma                 | other |
| PKP3                               | plakophilin 3                                                               | -5.85 | 0.0200 | Membrane                            | other |
| PLEKHA5                            | pleckstrin homology domain containing, family A member 5                    | 1.93  | 0.0166 | Unknown                             | other |
| PLEKHF2<br>(includes<br>EG:79666)  | pleckstrin homology domain containing, family F (with FYVE domain) member 2 | 2.72  | 0.0254 | Unknown                             | other |
| PMAIP1                             | phorbol-12-myristate-13-acetate-induced protein 1                           | 2.03  | 0.0296 | Cytoplasm<br>Plasma                 | other |
| PMEPA1                             | prostate transmembrane protein, androgen induced 1                          | 1.91  | 0.0153 | Membrane                            | other |
| PMS2L1                             | postmeiotic segregation increased 2-like 1 pseudogene                       | -1.53 | 0.0519 | Unknown                             | other |
| PMS2L11                            | postmeiotic segregation increased 2-like 11 pseudogene                      | -1.53 | 0.0137 | Unknown                             | other |
| PMS2L2                             | postmeiotic segregation increased 2-like 2 pseudogene                       | 1.54  | 0.0304 | Unknown                             | other |
| POLDIP3                            | polymerase (DNA-directed), delta interacting protein 3                      | -3.43 | 0.0402 | Nucleus                             | other |
| PPP1R15A<br>(includes<br>EG:23645) | protein phosphatase 1, regulatory (inhibitor) subunit 15A                   | -1.54 | 0.0466 | Cytoplasm                           | other |
| PRDM5                              | PR domain containing 5                                                      | -1.49 | 0.0507 | Nucleus<br>Plasma                   | other |
| PROCR                              | protein C receptor, endothelial (EPCR)                                      | 1.95  | 0.0539 | Membrane                            | other |
| PRPF39                             | PRP39 pre-mRNA processing factor 39 homolog ( <i>S. cerevisiae</i> )        | 2.14  | 0.0389 | Unknown                             | other |
| PRR14                              | proline rich 14                                                             | -1.57 | 0.0433 | Unknown                             | other |
| PSIP1                              | PC4 and SFRS1 interacting protein 1                                         | 1.68  | 0.0298 | Nucleus                             | other |
| PSMG1                              | proteasome (prosome, macropain) assembly chaperone 1                        | 1.73  | 0.0452 | Plasma<br>Membrane<br>Extracellular | other |
| PTH                                | parathyroid hormone                                                         | 1.46  | 0.0540 | Space                               | other |
| RABGAP1                            | RAB GTPase activating protein 1                                             | 1.46  | 0.0264 | Cytoplasm                           | other |
| RAD21                              | RAD21 homolog ( <i>S. pombe</i> )                                           | 2.37  | 0.0537 | Nucleus                             | other |

|                    |                                                                   |       |        |               |       |
|--------------------|-------------------------------------------------------------------|-------|--------|---------------|-------|
| RANGAP1            | Ran GTPase activating protein 1                                   | -1.59 | 0.0361 | Cytoplasm     | other |
| RAPGEF5            | Rap guanine nucleotide exchange factor (GEF) 5                    | 2.11  | 0.0229 | Nucleus       | other |
| RASSF4             | Ras association (RalGDS/AF-6) domain family member 4              | -1.55 | 0.0449 | Unknown       | other |
| RASSF7             | Ras association (RalGDS/AF-6) domain family (N-terminal) member 7 | -1.46 | 0.0230 | Unknown       | other |
| RB1CC1             | RB1-inducible coiled-coil 1                                       | 1.49  | 0.0417 | Nucleus       | other |
| RBM26              | RNA binding motif protein 26                                      | 2.18  | 0.0461 | Unknown       | other |
| RCC1               |                                                                   |       |        |               |       |
| (includes EG:1104) | regulator of chromosome condensation 1                            | -1.96 | 0.0381 | Nucleus       | other |
| RFPL1              | ret finger protein-like 1                                         | -1.68 | 0.0337 | Unknown       | other |
|                    | required for meiotic nuclear division 5                           |       |        |               |       |
| RMND5A             | homolog A ( <i>S. cerevisiae</i> )                                | -1.89 | 0.0406 | Unknown       | other |
| RNF114             | ring finger protein 114                                           | -1.75 | 0.0405 | Unknown       | other |
| RNF17              | ring finger protein 17                                            | 1.93  | 0.0454 | Cytoplasm     | other |
| RNF187             | ring finger protein 187                                           | -1.7  | 0.0468 | Unknown       | other |
| RNF220             | ring finger protein 220                                           | -1.74 | 0.0461 | Unknown       | other |
| RNF5               |                                                                   |       |        |               |       |
| (includes EG:6048) | ring finger protein 5                                             | 1.48  | 0.0487 | Cytoplasm     | other |
| RNPS1              | RNA binding protein S1, serine-rich domain                        | -2.19 | 0.0318 | Nucleus       | other |
| RNPS1              | RNA binding protein S1, serine-rich domain                        | -1.89 | 0.0239 | Nucleus       | other |
| RP5-1000E10.4      | suppressor of IKK epsilon                                         | -2.53 | 0.0468 | Unknown       | other |
|                    | retinitis pigmentosa GTPase regulator                             |       |        |               |       |
| RPGRIP1            | interacting protein 1                                             | -1.51 | 0.0349 | Cytoplasm     | other |
| RPL13A             | ribosomal protein L13a                                            | -1.55 | 0.0283 | Cytoplasm     | other |
| RPL37              | ribosomal protein L37                                             | 1.81  | 0.0253 | Cytoplasm     | other |
| RPL5               |                                                                   |       |        |               |       |
| (includes EG:6125) | ribosomal protein L5                                              | 1.46  | 0.0425 | Cytoplasm     | other |
| RPS25              | ribosomal protein S25                                             | 1.9   | 0.0494 | Cytoplasm     | other |
|                    | ribosomal RNA processing 7 homolog A ( <i>S. cerevisiae</i> )     |       |        |               |       |
| RRP7A              |                                                                   | -1.84 | 0.0163 | Cytoplasm     | other |
| RTN2               | reticulon 2                                                       | -2.25 | 0.0179 | Cytoplasm     | other |
| RUSC2              | RUN and SH3 domain containing 2                                   | -1.73 | 0.0536 | Unknown       | other |
| RWDD3              | RWD domain containing 3                                           | 1.74  | 0.0533 | Unknown       | other |
| SBNO2              | strawberry notch homolog 2 ( <i>Drosophila</i> )                  | -4.15 | 0.0473 | Unknown       | other |
|                    |                                                                   |       |        | Extracellular |       |
| SCG3               | secretogranin III                                                 | 1.86  | 0.0541 | Space         | other |
|                    |                                                                   |       |        | Plasma        |       |
| SDC2               | syndecan 2                                                        | 2.23  | 0.0314 | Membrane      | other |
| SDK2               | sidekick homolog 2 (chicken)                                      | -1.94 | 0.0311 | Unknown       | other |
| SEC31A             | SEC31 homolog A ( <i>S. cerevisiae</i> )                          | 1.85  | 0.0388 | Cytoplasm     | other |
|                    | sema domain, immunoglobulin domain (Ig),                          |       |        | Extracellular |       |
| SEMA3C             | short basic domain, secreted, (semaphorin) 3C                     | 2.06  | 0.0233 | Space         | other |
|                    | sema domain, immunoglobulin domain (Ig),                          |       |        |               |       |
|                    | transmembrane domain (TM) and short                               |       |        | Plasma        |       |
| SEMA4C             | cytoplasmic domain, (semaphorin) 4C                               | -1.99 | 0.0185 | Membrane      | other |
| SEPT11             | septin 11                                                         | -1.78 | 0.0429 | Nucleus       | other |
|                    | serpin peptidase inhibitor, clade A (alpha-1                      |       |        | Extracellular |       |
| SERPINA3           | antiproteinase, antitrypsin), member 3                            | -1.46 | 0.0517 | Space         | other |
|                    |                                                                   |       |        | Plasma        |       |
| SEZ6L              | seizure related 6 homolog (mouse)-like                            | -1.52 | 0.0482 | Membrane      | other |
| SEZ6L2             | seizure related 6 homolog (mouse)-like 2                          | -1.57 | 0.0544 | Unknown       | other |

|           |                                                                                                            |       |        |                        |       |
|-----------|------------------------------------------------------------------------------------------------------------|-------|--------|------------------------|-------|
| SF3A2     | splicing factor 3a, subunit 2, 66kDa<br>Sfi1 homolog, spindle assembly associated                          | -1.8  | 0.0425 | Nucleus                | other |
| SFI1      | (yeast)                                                                                                    | -1.77 | 0.0077 | Cytoplasm              | other |
| SFRS1     | splicing factor, arginine/serine-rich 1                                                                    | -1.69 | 0.0403 | Nucleus                | other |
| SFRS10    | splicing factor, arginine/serine-rich 10<br>(transformer 2 homolog, Drosophila)                            | 1.62  | 0.0350 | Nucleus                | other |
| SFRS15    | splicing factor, arginine/serine-rich 15                                                                   | -1.67 | 0.0329 | Nucleus                | other |
| SGTA      | small glutamine-rich tetratricopeptide repeat<br>(TPR)-containing, alpha                                   | -1.59 | 0.0354 | Cytoplasm              | other |
| SIDT2     | SID1 transmembrane family, member 2                                                                        | -1.75 | 0.0386 | Unknown                | other |
| SIP1      | survival of motor neuron protein interacting<br>protein 1                                                  | 3.33  | 0.0389 | Nucleus                | other |
| SKP2      | S-phase kinase-associated protein 2 (p45)                                                                  | -1.56 | 0.0515 | Nucleus                | other |
| SLITRK5   | SLIT and NTRK-like family, member 5                                                                        | 1.75  | 0.0380 | Unknown                | other |
| SMA4      | glucuronidase, beta pseudogene                                                                             | 2.18  | 0.0377 | Unknown                | other |
| SMG5      | Smg-5 homolog, nonsense mediated mRNA<br>decay factor (C. elegans)                                         | -1.6  | 0.0507 | Nucleus                | other |
| SNRPA1    | small nuclear ribonucleoprotein polypeptide<br>A'                                                          | 1.97  | 0.0360 | Nucleus                | other |
| SNRPG     | small nuclear ribonucleoprotein polypeptide<br>G                                                           | 1.72  | 0.0227 | Nucleus                | other |
| SOCS1     | suppressor of cytokine signaling 1                                                                         | -2.06 | 0.0470 | Cytoplasm              | other |
| SPAG11A   | sperm associated antigen 11A                                                                               | -2.03 | 0.0289 | Unknown                | other |
| SPG11     | (includes                                                                                                  |       |        |                        |       |
| EG:80208) | spastic paraplegia 11 (autosomal recessive)<br>spla/ryanodine receptor domain and SOCS<br>box containing 3 | 1.61  | 0.0408 | Unknown                | other |
| SPSB3     |                                                                                                            | -2.23 | 0.0287 | Unknown<br>Plasma      | other |
| SPTBN1    | spectrin, beta, non-erythrocytic 1                                                                         | -1.61 | 0.0495 | Membrane               | other |
| SSR1      | signal sequence receptor, alpha                                                                            | 1.49  | 0.0254 | Cytoplasm<br>Plasma    | other |
| SSX2IP    | synovial sarcoma, X breakpoint 2 interacting<br>protein                                                    | 1.51  | 0.0480 | Membrane               | other |
| STAG2     | stromal antigen 2                                                                                          | 2.55  | 0.0254 | Nucleus                | other |
| STAG3L4   | stromal antigen 3-like 4                                                                                   | -1.64 | 0.0543 | Unknown<br>Plasma      | other |
| SV2C      | synaptic vesicle glycoprotein 2C                                                                           | -1.77 | 0.0222 | Membrane               | other |
| SYMPK     | symplekin                                                                                                  | -2.18 | 0.0415 | Cytoplasm              | other |
| SYTL2     | synaptotagmin-like 2                                                                                       | -2.25 | 0.0303 | Cytoplasm              | other |
| TAGLN2    | transgelin 2                                                                                               | -2.11 | 0.0224 | Cytoplasm<br>Plasma    | other |
| TBC1D8    | TBC1 domain family, member 8 (with GRAM<br>domain)                                                         | 1.93  | 0.0313 | Membrane               | other |
| TCL1A     | T-cell leukemia/lymphoma 1A                                                                                | -1.46 | 0.0520 | Nucleus                | other |
| TELO2     | TEL2, telomere maintenance 2, homolog (S.<br>cerevisiae)                                                   | -1.57 | 0.0423 | Unknown                | other |
| TEX13B    | testis expressed 13B                                                                                       | -1.72 | 0.0440 | Unknown                | other |
| TFPI      | tissue factor pathway inhibitor (lipoprotein-<br>associated coagulation inhibitor)                         | 1.68  | 0.0352 | Extracellular<br>Space | other |
| THOC2     | THO complex 2                                                                                              | 2.08  | 0.0376 | Nucleus                | other |
| THUMPD1   | THUMP domain containing 1                                                                                  | 1.71  | 0.0368 | Unknown                | other |
| TIA1      | TIA1 cytotoxic granule-associated RNA<br>binding protein                                                   | 1.91  | 0.0348 | Nucleus                | other |
| TLE3      | transducin-like enhancer of split 3 (E(sp1)<br>homolog, Drosophila)                                        | -2.11 | 0.0283 | Nucleus                | other |
| TMBIM6    | transmembrane BAX inhibitor motif<br>containing 6                                                          | -1.82 | 0.0465 | Nucleus                | other |
| TMEM135   | transmembrane protein 135                                                                                  | 1.93  | 0.0356 | Unknown                | other |

|                     |                                                                                          |       |        |                            |       |
|---------------------|------------------------------------------------------------------------------------------|-------|--------|----------------------------|-------|
| TMEM184C            | transmembrane protein 184C                                                               | 1.52  | 0.0543 | Unknown<br>Plasma          | other |
| TMEM5               | transmembrane protein 5                                                                  | 2     | 0.0196 | Membrane                   | other |
| TMEM70              | transmembrane protein 70                                                                 | 1.76  | 0.0463 | Unknown                    | other |
|                     | tumor necrosis factor, alpha-induced protein                                             |       |        | Extracellular              |       |
| TNFAIP2             | 2                                                                                        | -1.5  | 0.0390 | Space                      | other |
| TOB2                | transducer of ERBB2, 2                                                                   | 2.18  | 0.0262 | Nucleus                    | other |
| TOLLIP              | toll interacting protein                                                                 | -1.61 | 0.0501 | Cytoplasm                  | other |
| TPRKB               | TP53RK binding protein                                                                   | 1.84  | 0.0459 | Unknown                    | other |
| TRA@                | T cell receptor alpha locus                                                              | -1.54 | 0.0456 | Cytoplasm                  | other |
| TRAF3               | TNF receptor-associated factor 3                                                         | 1.46  | 0.0542 | Cytoplasm<br>Plasma        | other |
| TRAPPC9             | trafficking protein particle complex 9                                                   | -1.84 | 0.0202 | Membrane                   | other |
| TRD@                | T cell receptor delta locus                                                              | -1.56 | 0.0228 | Cytoplasm<br>Plasma        | other |
| TSPAN13             | tetraspanin 13                                                                           | 1.78  | 0.0460 | Membrane<br>Plasma         | other |
| TSPAN4              | tetraspanin 4                                                                            | -3.21 | 0.0209 | Membrane                   | other |
| TSPYL4              | TSPY-like 4                                                                              | 1.7   | 0.0128 | Nucleus                    | other |
| TUBA1A              | tubulin, alpha 1a                                                                        | 1.83  | 0.0519 | Cytoplasm                  | other |
| TUBGCP3             | tubulin, gamma complex associated protein 3                                              | 2.09  | 0.0352 | Cytoplasm                  | other |
| UBE2Z               | ubiquitin-conjugating enzyme E2Z                                                         | -1.64 | 0.0237 | Unknown                    | other |
| UBIAD1              | UbiA prenyltransferase domain containing 1                                               | -1.75 | 0.0450 | Nucleus                    | other |
| UBQLN2              | ubiquilin 2                                                                              | 1.93  | 0.0126 | Nucleus                    | other |
| UBQLN4              | ubiquilin 4                                                                              | 2.32  | 0.0481 | Cytoplasm                  | other |
| VPS13D              | vacuolar protein sorting 13 homolog D (S. cerevisiae)                                    | -1.7  | 0.0477 | Unknown                    | other |
| WAPAL               | wings apart-like homolog (Drosophila)                                                    | 2.03  | 0.0180 | Nucleus                    | other |
| WBP1                | WW domain binding protein 1                                                              | -2.12 | 0.0534 | Cytoplasm                  | other |
| WBP2                | WW domain binding protein 2                                                              | -2.17 | 0.0104 | Cytoplasm<br>Extracellular | other |
| WDR1                | WD repeat domain 1                                                                       | -2.43 | 0.0498 | Space                      | other |
| WDR23               | WD repeat domain 23                                                                      | -1.67 | 0.0199 | Unknown                    | other |
| WDR42A              | WD repeat domain 42A                                                                     | -1.58 | 0.0267 | Unknown                    | other |
| WDR6                |                                                                                          |       |        |                            |       |
| (includes EG:11180) |                                                                                          |       |        |                            |       |
| WDR6                | WD repeat domain 6                                                                       | -1.91 | 0.0505 | Unknown                    | other |
| WDTC1               | WD and tetratricopeptide repeats 1                                                       | -2.37 | 0.0122 | Unknown                    | other |
| WIZ                 | widely interspaced zinc finger motifs                                                    | -2.83 | 0.0536 | Nucleus<br>Extracellular   | other |
| WRB                 | tryptophan rich basic protein                                                            | 1.72  | 0.0289 | Space                      | other |
| YIPF2               | Yip1 domain family, member 2                                                             | -2.23 | 0.0127 | Unknown                    | other |
| YTHDF2              | YTH domain family, member 2                                                              | 1.67  | 0.0217 | Unknown                    | other |
| YTHDF3              | YTH domain family, member 3                                                              | 1.52  | 0.0380 | Cytoplasm                  | other |
| YWHAB               | tyrosine 3-monooxygenase/tryptophan 5-monooxygenase activation protein, beta polypeptide | 2.6   | 0.0202 | Cytoplasm                  | other |
| YWHAB               | tyrosine 3-monooxygenase/tryptophan 5-monooxygenase activation protein, beta polypeptide | 2.77  | 0.0221 | Cytoplasm                  | other |
| ZBTB10              | zinc finger and BTB domain containing 10                                                 | 2.17  | 0.0175 | Nucleus                    | other |
| ZBTB11              | zinc finger and BTB domain containing 11                                                 | 2.12  | 0.0306 | Nucleus                    | other |
| ZC3H15              | zinc finger CCCH-type containing 15                                                      | 2.03  | 0.0437 | Nucleus                    | other |
| ZER1                | zer-1 homolog (C. elegans)                                                               | -1.76 | 0.0355 | Unknown                    | other |
| ZFR                 | zinc finger RNA binding protein                                                          | -1.9  | 0.0325 | Nucleus                    | other |
| ZNF160              | zinc finger protein 160                                                                  | 1.81  | 0.0251 | Nucleus                    | other |
| ZNF580              | zinc finger protein 580                                                                  | -1.67 | 0.0226 | Nucleus                    | other |

|                     |                                                                       |       |        |                            |             |
|---------------------|-----------------------------------------------------------------------|-------|--------|----------------------------|-------------|
| ZNF710              | zinc finger protein 710                                               | -1.5  | 0.0430 | Nucleus                    | other       |
| ZNF768              | zinc finger protein 768                                               | -2.1  | 0.0436 | Unknown                    | other       |
| ZNF783              | zinc finger family member 783                                         | -1.53 | 0.0479 | Unknown                    | other       |
| ZNF834              | zinc finger protein 834                                               | -1.85 | 0.0447 | Unknown                    | other       |
| ZRSR2               | zinc finger (CCCH type), RNA-binding motif and serine/arginine rich 2 | -1.52 | 0.0254 | Nucleus                    | other       |
| ZZEF1               | zinc finger, ZZ-type with EF-hand domain 1                            | -2.29 | 0.0256 | Unknown<br>Plasma          | other       |
| ADAM15              | ADAM metallopeptidase domain 15                                       | -4.29 | 0.0279 | Membrane<br>Plasma         | peptidase   |
| ADAM17              | ADAM metallopeptidase domain 17                                       | 1.58  | 0.0352 | Membrane                   | peptidase   |
| ADAM9               | ADAM metallopeptidase domain 9 (meltrin gamma)                        | 2.39  | 0.0188 | Plasma<br>Membrane         | peptidase   |
| ATG4B               | ATG4 autophagy related 4 homolog B (S. cerevisiae)                    | -2.02 | 0.0266 | Cytoplasm                  | peptidase   |
| CAPNS1              | calpain, small subunit 1                                              | -1.5  | 0.0481 | Cytoplasm                  | peptidase   |
| CASP6               | caspace 6, apoptosis-related cysteine peptidase                       | 2.22  | 0.0334 | Cytoplasm                  | peptidase   |
| CLGN                | calmegin                                                              | 2.69  | 0.0252 | Cytoplasm                  | peptidase   |
| CPN1                | carboxypeptidase N, polypeptide 1                                     | -1.87 | 0.0538 | Extracellular<br>Space     | peptidase   |
| CTRL                | chymotrypsin-like                                                     | -1.91 | 0.0448 | Space<br>Extracellular     | peptidase   |
| ELA2A               | elastase 2A                                                           | -1.67 | 0.0374 | Space                      | peptidase   |
| FOLH1               | folate hydrolase (prostate-specific membrane antigen) 1               | -1.59 | 0.0249 | Plasma<br>Membrane         | peptidase   |
| KIAA1967            | KIAA1967                                                              | -2.49 | 0.0270 | Cytoplasm                  | peptidase   |
| MBTPS2              | membrane-bound transcription factor peptidase, site 2                 | -1.5  | 0.0314 | Cytoplasm<br>Extracellular | peptidase   |
| MMP11               | matrix metallopeptidase 11 (stromelysin 3)                            | -1.48 | 0.0356 | Space<br>Extracellular     | peptidase   |
| MMP19               | matrix metallopeptidase 19                                            | -1.52 | 0.0465 | Space<br>Extracellular     | peptidase   |
| PGCP                | plasma glutamate carboxypeptidase                                     | -1.58 | 0.0346 | Space                      | peptidase   |
| PREPL               | prolyl endopeptidase-like                                             | -1.53 | 0.0512 | Unknown                    | peptidase   |
| PSMA7               | proteasome (prosome, macropain) subunit, alpha type, 7                | 1.55  | 0.0182 | Cytoplasm                  | peptidase   |
| UCHL5               | ubiquitin carboxyl-terminal hydrolase L5                              | 2.21  | 0.0290 | Cytoplasm                  | peptidase   |
| USP1                | ubiquitin specific peptidase 1                                        | 1.76  | 0.0063 | Cytoplasm                  | peptidase   |
| USP21               | ubiquitin specific peptidase 21                                       | -1.58 | 0.0270 | Cytoplasm                  | peptidase   |
| (includes EG:27005) |                                                                       |       |        |                            |             |
| USP5                | ubiquitin specific peptidase 5 (isopeptidase T)                       | -3.85 | 0.0156 | Cytoplasm                  | peptidase   |
| ACP1                | acid phosphatase 1, soluble                                           | 1.63  | 0.0266 | Cytoplasm                  | phosphatase |
| ACP2                | acid phosphatase 2, lysosomal                                         | -1.82 | 0.0213 | Cytoplasm                  | phosphatase |
| CDC14A              | CDC14 cell division cycle 14 homolog A (S. cerevisiae)                | 3.09  | 0.0438 | Nucleus                    | phosphatase |
| CDC25C              | cell division cycle 25 homolog C (S. pombe)                           | -2.12 | 0.0346 | Nucleus                    | phosphatase |

|                                         |                                                                                                           |       |        |                 |                         |
|-----------------------------------------|-----------------------------------------------------------------------------------------------------------|-------|--------|-----------------|-------------------------|
| ILKAP                                   | integrin-linked kinase-associated serine/threonine phosphatase 2C                                         | 1.87  | 0.0526 | Cytoplasm       | phosphatase             |
| INPP5J                                  | inositol polyphosphate-5-phosphatase J                                                                    | -1.53 | 0.0329 | Cytoplasm       | phosphatase             |
| NUDT4                                   | nudix (nucleoside diphosphate linked moiety X)-type motif 4                                               | -1.71 | 0.0215 | Cytoplasm       | phosphatase             |
| PPFIA3<br>(includes EG:8541)            | protein tyrosine phosphatase, receptor type, f polypeptide (PTPRF), interacting protein (liprin), alpha 3 | -1.63 | 0.0371 | Plasma Membrane | phosphatase             |
| PPP1CB<br>PPP2R3A<br>(includes EG:5523) | protein phosphatase 1, catalytic subunit, beta isoform                                                    | 4.15  | 0.0311 | Cytoplasm       | phosphatase             |
|                                         | protein phosphatase 2 (formerly 2A), regulatory subunit B'', alpha                                        | -1.52 | 0.0495 | Nucleus         | phosphatase             |
| PPP2R4                                  | protein phosphatase 2A activator, regulatory subunit 4                                                    | -1.68 | 0.0307 | Cytoplasm       | phosphatase             |
| PPP3CA                                  | protein phosphatase 3 (formerly 2B), catalytic subunit, alpha isoform                                     | 2.27  | 0.0110 | Cytoplasm       | phosphatase             |
| PPP4C                                   | protein phosphatase 4 (formerly X), catalytic subunit                                                     | -1.95 | 0.0367 | Cytoplasm       | phosphatase             |
| SYNJ1                                   | synaptojanin 1                                                                                            | 2.11  | 0.0073 | Cytoplasm       | phosphatase             |
| SYNJ2                                   | synaptojanin 2                                                                                            | -1.47 | 0.0425 | Cytoplasm       | phosphatase             |
| TPTE                                    | transmembrane phosphatase with tensin homology                                                            | 1.73  | 0.0419 | Plasma Membrane | phosphatase             |
| ARNT                                    | aryl hydrocarbon receptor nuclear translocator                                                            | -1.96 | 0.0283 | Nucleus         | transcription regulator |
| ASB1                                    | ankyrin repeat and SOCS box-containing 1                                                                  | -1.61 | 0.0263 | Nucleus         | transcription regulator |
| ATF1                                    | activating transcription factor 1                                                                         | 2     | 0.0266 | Nucleus         | transcription regulator |
| BTF3                                    | basic transcription factor 3                                                                              | 2.24  | 0.0077 | Nucleus         | transcription regulator |
| BTG2                                    | BTG family, member 2                                                                                      | -1.88 | 0.0334 | Nucleus         | transcription regulator |
| C19ORF2                                 | chromosome 19 open reading frame 2                                                                        | 1.66  | 0.0536 | Nucleus         | transcription regulator |
| CALCOCO1                                | calcium binding and coiled-coil domain 1                                                                  | -1.67 | 0.0524 | Nucleus         | transcription regulator |

|        |                                                                      |       |        |           |                         |
|--------|----------------------------------------------------------------------|-------|--------|-----------|-------------------------|
| CALR   | calreticulin                                                         | -2.08 | 0.0482 | Cytoplasm | transcription regulator |
| CAND1  | cullin-associated and neddylation-dissociated 1                      | 1.89  | 0.0295 | Cytoplasm | transcription regulator |
| CBX4   | chromobox homolog 4 (Pc class homolog, Drosophila)                   | -3.93 | 0.0487 | Nucleus   | transcription regulator |
| CEBPD  | CCAAT/enhancer binding protein (C/EBP), delta                        | 1.83  | 0.0268 | Nucleus   | transcription regulator |
| CNOT8  | CCR4-NOT transcription complex, subunit 8                            | 2.55  | 0.0277 | Nucleus   | transcription regulator |
| COP5   | COP9 constitutive photomorphogenic homolog subunit 5 (Arabidopsis)   | 1.65  | 0.0359 | Nucleus   | transcription regulator |
| CREBZF | CREB/ATF bZIP transcription factor                                   | 1.56  | 0.0356 | Nucleus   | transcription regulator |
| CXXC1  | CXXC finger 1 (PHD domain)                                           | -1.7  | 0.0471 | Nucleus   | transcription regulator |
| DBP    | D site of albumin promoter (albumin D-box) binding protein           | -1.67 | 0.0479 | Nucleus   | transcription regulator |
| DR1    | down-regulator of transcription 1, TBP-binding (negative cofactor 2) | 2.03  | 0.0294 | Nucleus   | transcription regulator |
| E2F4   | E2F transcription factor 4, p107/p130-binding                        | -1.82 | 0.0406 | Nucleus   | transcription regulator |
| ETV4   | ets variant 4                                                        | -1.72 | 0.0304 | Nucleus   | transcription regulator |
| FEM1B  | fem-1 homolog b (C. elegans)                                         | 2.14  | 0.0209 | Nucleus   | transcription regulator |
| FUS    | fusion (involved in t(12;16) in malignant liposarcoma)               | -2.26 | 0.0279 | Nucleus   | transcription regulator |
| GTF2H4 | general transcription factor IIH, polypeptide 4, 52kDa               | -1.88 | 0.0487 | Nucleus   | transcription regulator |
| HES1   | hairy and enhancer of split 1, (Drosophila)                          | 1.76  | 0.0340 | Nucleus   | transcription regulator |
| HMGA1  | high mobility group AT-hook 1                                        | -1.81 | 0.0399 | Nucleus   | transcription regulator |
| HMX1   | H6 family homeobox 1                                                 | -1.67 | 0.0139 | Nucleus   | transcription regulator |
| HOXB13 | homeobox B13                                                         | -2.2  | 0.0090 | Nucleus   | transcription regulator |

|                                    |                                                                                                 |       |        |           |                         |
|------------------------------------|-------------------------------------------------------------------------------------------------|-------|--------|-----------|-------------------------|
| HTATSF1                            | HIV-1 Tat specific factor 1                                                                     | 1.79  | 0.0286 | Nucleus   | transcription regulator |
| KAT5                               | K(lysine) acetyltransferase 5                                                                   | -1.58 | 0.0232 | Nucleus   | transcription regulator |
| KLF10                              | Kruppel-like factor 10                                                                          | 1.7   | 0.0438 | Nucleus   | transcription regulator |
| LASS6                              | LAG1 homolog, ceramide synthase 6                                                               | 1.56  | 0.0427 | Nucleus   | transcription regulator |
| LEF1                               | lymphoid enhancer-binding factor 1                                                              | 2.01  | 0.0175 | Nucleus   | transcription regulator |
| LRCH4                              | leucine-rich repeats and calponin homology (CH) domain containing 4                             | -1.75 | 0.0230 | Cytoplasm | transcription regulator |
| MAF                                | v-maf musculoaponeurotic fibrosarcoma oncogene homolog (avian)                                  | 3.58  | 0.0063 | Nucleus   | transcription regulator |
| MED16                              | mediator complex subunit 16                                                                     | -1.69 | 0.0444 | Nucleus   | transcription regulator |
| MLL2                               | myeloid/lymphoid or mixed-lineage leukemia 2                                                    | -1.87 | 0.0467 | Nucleus   | transcription regulator |
| MLLT10                             | myeloid/lymphoid or mixed-lineage leukemia (trithorax homolog, Drosophila); translocated to, 10 | -1.77 | 0.0383 | Nucleus   | transcription regulator |
| MYBL2                              | v-myb myeloblastosis viral oncogene homolog (avian)-like 2                                      | -1.6  | 0.0394 | Nucleus   | transcription regulator |
| MZF1                               | myeloid zinc finger 1                                                                           | -1.7  | 0.0405 | Nucleus   | transcription regulator |
| NFRKB                              | nuclear factor related to kappaB binding protein                                                | -1.7  | 0.0475 | Nucleus   | transcription regulator |
| NFYA                               | nuclear transcription factor Y, alpha                                                           | -1.83 | 0.0176 | Nucleus   | transcription regulator |
| NKX2-1                             | NK2 homeobox 1                                                                                  | -1.59 | 0.0412 | Nucleus   | transcription regulator |
| NR2C1                              | nuclear receptor subfamily 2, group C, member 1                                                 | 1.61  | 0.0262 | Nucleus   | transcription regulator |
| PA2G4                              | proliferation-associated 2G4, 38kDa                                                             | 1.48  | 0.0319 | Nucleus   | transcription regulator |
| PAX8<br>PDX1<br>(includes EG:3651) | paired box 8                                                                                    | -1.49 | 0.0408 | Nucleus   | transcription regulator |
|                                    | pancreatic and duodenal homeobox 1                                                              | -2.31 | 0.0441 | Nucleus   | transcription regulator |



|                                          |                                                                                                   |       |        |           |                         |
|------------------------------------------|---------------------------------------------------------------------------------------------------|-------|--------|-----------|-------------------------|
| PIAS2                                    | protein inhibitor of activated STAT, 2                                                            | -1.73 | 0.0440 | Nucleus   | transcription regulator |
| PIR                                      | pirin (iron-binding nuclear protein)                                                              | 1.71  | 0.0116 | Nucleus   | transcription regulator |
| PTGES2                                   | prostaglandin E synthase 2                                                                        | -1.86 | 0.0367 | Cytoplasm | transcription regulator |
| RB1                                      | retinoblastoma 1                                                                                  | 3.08  | 0.0191 | Nucleus   | transcription regulator |
| REST                                     | RE1-silencing transcription factor                                                                | 2.54  | 0.0188 | Nucleus   | transcription regulator |
| RFX5                                     | regulatory factor X, 5 (influences HLA class II expression)                                       | -1.46 | 0.0414 | Nucleus   | transcription regulator |
| RNF14                                    | ring finger protein 14                                                                            | 2.47  | 0.0534 | Nucleus   | transcription regulator |
| RNF6                                     | ring finger protein (C3H2C3 type) 6                                                               | 2.34  | 0.0420 | Nucleus   | transcription regulator |
| SAP30<br>SIN3B<br>(includes<br>EG:23309) | Sin3A-associated protein, 30kDa                                                                   | -2.47 | 0.0396 | Nucleus   | transcription regulator |
|                                          | SIN3 homolog B, transcription regulator (yeast)                                                   | -2.03 | 0.0215 | Nucleus   | transcription regulator |
| SMARCA5                                  | SWI/SNF related, matrix associated, actin dependent regulator of chromatin, subfamily a, member 5 | 1.86  | 0.0278 | Nucleus   | transcription regulator |
| SOX4                                     | SRY (sex determining region Y)-box 4                                                              | 1.62  | 0.0254 | Nucleus   | transcription regulator |
| SREBF2                                   | sterol regulatory element binding transcription factor 2                                          | -2.93 | 0.0271 | Nucleus   | transcription regulator |
| SSBP2                                    | single-stranded DNA binding protein 2                                                             | 2.11  | 0.0378 | Nucleus   | transcription regulator |
| SUB1                                     | SUB1 homolog ( <i>S. cerevisiae</i> )                                                             | 1.47  | 0.0445 | Nucleus   | transcription regulator |
| SUPT4H1                                  | suppressor of Ty 4 homolog 1 ( <i>S. cerevisiae</i> )                                             | -1.99 | 0.0351 | Nucleus   | transcription regulator |
| SUPT5H                                   | suppressor of Ty 5 homolog ( <i>S. cerevisiae</i> )                                               | -1.51 | 0.0517 | Nucleus   | transcription regulator |
| TAF1C                                    | TATA box binding protein (TBP)-associated factor, RNA polymerase I, C, 110kDa                     | -1.64 | 0.0514 | Nucleus   | transcription regulator |
| TAF2                                     | TAF2 RNA polymerase II, TATA box binding protein (TBP)-associated factor, 150kDa                  | 2.16  | 0.0255 | Nucleus   | transcription regulator |

|                            |                                                                              |       |        |           |                         |
|----------------------------|------------------------------------------------------------------------------|-------|--------|-----------|-------------------------|
| TBL1XR1                    | transducin (beta)-like 1 X-linked receptor 1                                 | 1.57  | 0.0283 | Nucleus   | transcription regulator |
| TCEB3                      | transcription elongation factor B (SIII), polypeptide 3 (110kDa, elongin A)  | -1.98 | 0.0531 | Nucleus   | transcription regulator |
| TCERG1                     | transcription elongation regulator 1                                         | 1.6   | 0.0425 | Nucleus   | transcription regulator |
| TCF3                       | transcription factor 3 (E2A immunoglobulin enhancer binding factors E12/E47) | 1.55  | 0.0489 | Nucleus   | transcription regulator |
| TGIF2                      | TGFB-induced factor homeobox 2                                               | -1.47 | 0.0250 | Nucleus   | transcription regulator |
| TLX2<br>(includes EG:3196) | T-cell leukemia homeobox 2                                                   | -1.81 | 0.0528 | Nucleus   | transcription regulator |
| TMF1                       | TATA element modulatory factor 1                                             | 1.52  | 0.0460 | Cytoplasm | transcription regulator |
| TRIM24                     | tripartite motif-containing 24                                               | 2.09  | 0.0236 | Nucleus   | transcription regulator |
| TRIM33                     | tripartite motif-containing 33                                               | 1.49  | 0.0522 | Nucleus   | transcription regulator |
| TSC22D1                    | TSC22 domain family, member 1                                                | 1.93  | 0.0502 | Nucleus   | transcription regulator |
| YEATS4                     | YEATS domain containing 4                                                    | 2.29  | 0.0194 | Nucleus   | transcription regulator |
| ZBTB16                     | zinc finger and BTB domain containing 16                                     | 3.17  | 0.0461 | Nucleus   | transcription regulator |
| ZBTB32                     | zinc finger and BTB domain containing 32                                     | -1.5  | 0.0519 | Nucleus   | transcription regulator |
| ZMIZ2                      | zinc finger, MIZ-type containing 2                                           | -2.65 | 0.0188 | Nucleus   | transcription regulator |
| ZNF268                     | zinc finger protein 268                                                      | 2.17  | 0.0196 | Nucleus   | transcription regulator |
| ZNF323                     | zinc finger protein 323                                                      | -1.7  | 0.0236 | Nucleus   | transcription regulator |
| ZNF444                     | zinc finger protein 444                                                      | -1.8  | 0.0339 | Nucleus   | transcription regulator |
| ZNF83                      | zinc finger protein 83                                                       | 2.58  | 0.0145 | Nucleus   | transcription regulator |
| EIF2S2                     | eukaryotic translation initiation factor 2, subunit 2 beta, 38kDa            | 1.57  | 0.0540 | Cytoplasm | translation regulator   |
| EIF3A                      | eukaryotic translation initiation factor 3,                                  | 2.06  | 0.0435 | Cytoplasm | translation             |

|          |                                                                                                    |       |        |                    |                                                                   |
|----------|----------------------------------------------------------------------------------------------------|-------|--------|--------------------|-------------------------------------------------------------------|
| EIF3J    | subunit A<br>eukaryotic translation initiation factor 3,<br>subunit J                              | 2.89  | 0.0398 | Cytoplasm          | regulator<br>translation<br>regulator<br>translation<br>regulator |
| EIF4E    | eukaryotic translation initiation factor 4E                                                        | 3.42  | 0.0079 | Cytoplasm          | regulator<br>translation<br>regulator                             |
| PAIP1    | poly(A) binding protein interacting protein 1                                                      | 2.43  | 0.0206 | Cytoplasm          | regulator                                                         |
| CHRNA2   | cholinergic receptor, nicotinic, alpha 2<br>(neuronal)                                             | -1.55 | 0.0379 | Plasma<br>Membrane | transmemb<br>rane<br>receptor                                     |
| CLDN4    | claudin 4                                                                                          | -2.34 | 0.0448 | Plasma<br>Membrane | transmemb<br>rane<br>receptor                                     |
| HLA-DRB1 | major histocompatibility complex, class II, DR<br>beta 1                                           | 2.46  | 0.0306 | Plasma<br>Membrane | transmemb<br>rane<br>receptor                                     |
| IL22RA1  | interleukin 22 receptor, alpha 1                                                                   | -1.57 | 0.0355 | Plasma<br>Membrane | transmemb<br>rane<br>receptor                                     |
| IL2RG    | interleukin 2 receptor, gamma (severe<br>combined immunodeficiency)                                | -1.54 | 0.0369 | Plasma<br>Membrane | transmemb<br>rane<br>receptor                                     |
| ITGB1    | integrin, beta 1 (fibronectin receptor, beta<br>polypeptide, antigen CD29 includes MDF2,<br>MSK12) | 4.66  | 0.0435 | Plasma<br>Membrane | transmemb<br>rane<br>receptor                                     |
| PVR      | poliovirus receptor                                                                                | -1.47 | 0.0361 | Plasma<br>Membrane | transmemb<br>rane<br>receptor                                     |
| RARRES2  | retinoic acid receptor responder (tazarotene<br>induced) 2                                         | -1.49 | 0.0507 | Plasma<br>Membrane | transmemb<br>rane<br>receptor                                     |
| SPN      | sialophorin                                                                                        | 2.41  | 0.0449 | Plasma<br>Membrane | transmemb<br>rane<br>receptor                                     |
| TNFRSF25 | tumor necrosis factor receptor superfamily,<br>member 25                                           | -1.7  | 0.0531 | Plasma<br>Membrane | transmemb<br>rane<br>receptor                                     |
| ABCA1    | ATP-binding cassette, sub-family A (ABC1),<br>member 1                                             | -2.12 | 0.0490 | Plasma<br>Membrane | transporter                                                       |
| ABCG4    | ATP-binding cassette, sub-family G (WHITE),<br>member 4                                            | -1.49 | 0.0520 | Plasma<br>Membrane | transporter                                                       |
| AP1M2    | adaptor-related protein complex 1, mu 2<br>subunit                                                 | -1.78 | 0.0438 | Cytoplasm          | transporter                                                       |
| AP2S1    | adaptor-related protein complex 2, sigma 1<br>subunit                                              | -1.95 | 0.0227 | Cytoplasm          | transporter                                                       |
| APBA3    | amyloid beta (A4) precursor protein-binding,<br>family A, member 3                                 | -1.74 | 0.0466 | Cytoplasm          | transporter                                                       |

|                                   |                                                                                           |       |        |                    |             |
|-----------------------------------|-------------------------------------------------------------------------------------------|-------|--------|--------------------|-------------|
| APOM                              | apolipoprotein M                                                                          | -1.49 | 0.0509 | Plasma<br>Membrane | transporter |
| AQP3                              | aquaporin 3 (Gill blood group)                                                            | -1.94 | 0.0126 | Plasma<br>Membrane | transporter |
| ARF5                              | ADP-ribosylation factor 5                                                                 | -1.66 | 0.0353 | Cytoplasm          | transporter |
| ATP13A3<br>(includes<br>EG:79572) | ATPase type 13A3<br>ATPase, Ca <sup>++</sup> transporting, plasma<br>membrane 1           | -2.22 | 0.0152 | Unknown<br>Plasma  | transporter |
| ATP2B1                            | ATP synthase, H <sup>+</sup> transporting, mitochondrial<br>F1 complex, delta subunit     | 2.07  | 0.0453 | Membrane           | transporter |
| ATP5D                             | ATPase, H <sup>+</sup> transporting, lysosomal accessory<br>protein 1                     | -1.47 | 0.0273 | Cytoplasm          | transporter |
| ATP6AP1                           | ATPase, H <sup>+</sup> transporting, lysosomal 16kDa, V0<br>subunit c                     | -1.49 | 0.0286 | Cytoplasm          | transporter |
| ATP6V0C                           | ATPase, H <sup>+</sup> transporting, lysosomal 56/58kDa,<br>V1 subunit B1                 | -2.68 | 0.0227 | Cytoplasm          | transporter |
| ATP6V1B1                          |                                                                                           | -1.48 | 0.0186 | Cytoplasm          | transporter |
| CHP                               | calcium binding protein P22                                                               | -1.72 | 0.0519 | Cytoplasm          | transporter |
| COPB1                             | coatamer protein complex, subunit beta 1                                                  | 1.5   | 0.0430 | Cytoplasm          | transporter |
| CSE1L                             | CSE1 chromosome segregation 1-like (yeast)                                                | 1.7   | 0.0269 | Nucleus            | transporter |
| ENSA                              | endosulfine alpha<br>erythrocyte membrane protein band 4.1 like<br>4B                     | -1.68 | 0.0411 | Unknown            | transporter |
| EPB41L4B                          |                                                                                           | 1.52  | 0.0444 | Unknown<br>Plasma  | transporter |
| EXOC7                             | exocyst complex component 7                                                               | -1.62 | 0.0528 | Membrane           | transporter |
| FABP7                             | fatty acid binding protein 7, brain                                                       | -1.94 | 0.0338 | Cytoplasm          | transporter |
| FDX1                              | ferredoxin 1<br>golgi associated, gamma adaptin ear<br>containing, ARF binding protein 1  | 1.49  | 0.0458 | Cytoplasm          | transporter |
| GGA1                              | karyopherin alpha 2 (RAG cohort 1, importin<br>alpha 1)                                   | -2.23 | 0.0134 | Cytoplasm          | transporter |
| KPNA2                             |                                                                                           | 1.54  | 0.0113 | Nucleus            | transporter |
| KPNB1                             | karyopherin (importin) beta 1                                                             | 3.96  | 0.0172 | Nucleus<br>Plasma  | transporter |
| LDLR                              | low density lipoprotein receptor<br>low density lipoprotein receptor adaptor<br>protein 1 | -1.78 | 0.0293 | Membrane           | transporter |
| LDLRAP1                           |                                                                                           | -1.9  | 0.0213 | Cytoplasm          | transporter |
| MB                                | myoglobin<br>myeloid cell leukemia sequence 1 (BCL2-<br>related)                          | -1.99 | 0.0441 | Cytoplasm          | transporter |
| MCL1                              | major facilitator superfamily domain<br>containing 1                                      | -5.14 | 0.0438 | Cytoplasm          | transporter |
| MFSD1                             |                                                                                           | 1.51  | 0.0491 | Unknown            | transporter |
| NUP50                             | nucleoporin 50kDa                                                                         | -1.84 | 0.0422 | Nucleus            | transporter |
| PEX7                              | peroxisomal biogenesis factor 7                                                           | 1.97  | 0.0421 | Cytoplasm          | transporter |
| PNMA2                             | paraneoplastic antigen MA2                                                                | -1.57 | 0.0408 | Nucleus            | transporter |

|                                  |                                                                                           |       |        |                            |             |
|----------------------------------|-------------------------------------------------------------------------------------------|-------|--------|----------------------------|-------------|
| RACGAP1                          | Rac GTPase activating protein 1                                                           | 1.45  | 0.0139 | Cytoplasm<br>Extracellular | transporter |
| RBP4                             | retinol binding protein 4, plasma                                                         | -1.52 | 0.0451 | Space                      | transporter |
| SCAMP1                           | secretory carrier membrane protein 1                                                      | -2.07 | 0.0313 | Cytoplasm                  | transporter |
| SCAMP2                           | secretory carrier membrane protein 2                                                      | -1.54 | 0.0336 | Cytoplasm                  | transporter |
| SEC22A                           | SEC22 vesicle trafficking protein homolog A<br>( <i>S. cerevisiae</i> )                   | 1.71  | 0.0229 | Cytoplasm                  | transporter |
| SEC62                            | SEC62 homolog ( <i>S. cerevisiae</i> )                                                    | 1.55  | 0.0233 | Cytoplasm                  | transporter |
| SEH1L                            | SEH1-like ( <i>S. cerevisiae</i> )                                                        | 1.75  | 0.0312 | Cytoplasm                  | transporter |
| SFXN3                            | sideroflexin 3                                                                            | -1.63 | 0.0370 | Cytoplasm                  | transporter |
| SLC11A2                          | solute carrier family 11 (proton-coupled<br>divalent metal ion transporters), member 2    | -1.92 | 0.0255 | Plasma<br>Membrane         | transporter |
| SLC15A1                          | solute carrier family 15 (oligopeptide<br>transporter), member 1                          | -2.13 | 0.0464 | Plasma<br>Membrane         | transporter |
| SLC16A1                          | solute carrier family 16, member 1<br>(monocarboxylic acid transporter 1)                 | 2.41  | 0.0150 | Plasma<br>Membrane         | transporter |
| SLC16A3                          | solute carrier family 16, member 3<br>(monocarboxylic acid transporter 4)                 | -3.56 | 0.0294 | Plasma<br>Membrane         | transporter |
| SLC19A1                          | solute carrier family 19 (folate transporter),<br>member 1                                | -1.63 | 0.0525 | Plasma<br>Membrane         | transporter |
| SLC19A2                          | solute carrier family 19 (thiamine<br>transporter), member 2                              | 1.98  | 0.0513 | Plasma<br>Membrane         | transporter |
| SLC22A4<br>(includes<br>EG:6583) | solute carrier family 22 (organic<br>cation/ergothioneine transporter), member 4          | -1.64 | 0.0401 | Plasma<br>Membrane         | transporter |
| SLC25A1                          | solute carrier family 25 (mitochondrial carrier;<br>citrate transporter), member 1        | -1.83 | 0.0498 | Plasma<br>Membrane         | transporter |
| SLC25A10                         | solute carrier family 25 (mitochondrial carrier;<br>dicarboxylate transporter), member 10 | -2.14 | 0.0384 | Cytoplasm                  | transporter |
| SLC25A13                         | solute carrier family 25, member 13 (citrin)                                              | 1.71  | 0.0135 | Cytoplasm                  | transporter |
| SLC25A22                         | solute carrier family 25 (mitochondrial carrier:<br>glutamate), member 22                 | -2.08 | 0.0517 | Cytoplasm                  | transporter |
| SLC25A44                         | solute carrier family 25, member 44                                                       | 1.65  | 0.0418 | Cytoplasm                  | transporter |
| SLC27A2                          | solute carrier family 27 (fatty acid<br>transporter), member 2                            | 2.26  | 0.0518 | Cytoplasm                  | transporter |
| SLC39A9                          | solute carrier family 39 (zinc transporter),<br>member 9                                  | -1.78 | 0.0415 | Unknown<br>Plasma          | transporter |
| SLC5A3                           | solute carrier family 5 (sodium/myo-inositol<br>cotransporter), member 3                  | -1.58 | 0.0488 | Plasma<br>Membrane         | transporter |
| SLC5A3                           | solute carrier family 5 (sodium/myo-inositol<br>cotransporter), member 3                  | 1.51  | 0.0516 | Plasma<br>Membrane         | transporter |
| SNAP23                           | synaptosomal-associated protein, 23kDa                                                    | 1.83  | 0.0461 | Plasma<br>Membrane         | transporter |
| SNX13                            | sorting nexin 13                                                                          | -1.58 | 0.0361 | Cytoplasm                  | transporter |
| SRI                              | sorcin                                                                                    | 1.93  | 0.0153 | Cytoplasm                  | transporter |
| SYT2                             | synaptotagmin II                                                                          | -2.28 | 0.0512 | Cytoplasm                  | transporter |

---

|         |                                                           |       |        |                     |             |
|---------|-----------------------------------------------------------|-------|--------|---------------------|-------------|
| TCOF1   | Treacher Collins-Franceschetti syndrome 1                 | 1.69  | 0.0345 | Nucleus             | transporter |
| TMED1   | transmembrane emp24 protein transport domain containing 1 | -1.91 | 0.0443 | Extracellular Space | transporter |
| TSNAX   | translin-associated factor X                              | 1.64  | 0.0226 | Nucleus             | transporter |
| USO1    | USO1 homolog, vesicle docking protein (yeast)             | -1.7  | 0.0266 | Cytoplasm           | transporter |
| VPS13A  | vacuolar protein sorting 13 homolog A (S. cerevisiae)     | 2.57  | 0.0098 | Cytoplasm           | transporter |
| ZFYVE16 | zinc finger, FYVE domain containing 16                    | 2.13  | 0.0216 | Nucleus             | transporter |

---

Genes differentially expressed in response to DHT for 2h in R1 cells

| Symbol   | Entrez Gene Name                                                                          | Fold Change | p-value  | Location            | Type                       |
|----------|-------------------------------------------------------------------------------------------|-------------|----------|---------------------|----------------------------|
|          | carbohydrate (N-acetylglucosamine-6-O)                                                    |             |          |                     |                            |
| CHST2    | sulfotransferase 2                                                                        | 2.92        | 0.0038   | Cytoplasm           | enzyme                     |
| DNM1L    | dynamin 1-like                                                                            | 1.7         | 0.0234   | Cytoplasm           | enzyme                     |
| FKBP5    | FK506 binding protein 5                                                                   | 4.45        | 0.0370   | Nucleus             | enzyme                     |
| NAT1     | N-acetyltransferase 1 (arylamine N-acetyltransferase)                                     | 3.18        | 0.0107   | Cytoplasm           | enzyme                     |
| ODC1     | ornithine decarboxylase 1                                                                 | 1.72        | 0.0101   | Cytoplasm           | enzyme                     |
| PDE9A    | phosphodiesterase 9A                                                                      | 1.77        | 0.0392   | Cytoplasm           | enzyme                     |
| POP1     | processing of precursor 1, ribonuclease P/MRP subunit ( <i>S. cerevisiae</i> )            | 1.54        | 0.0404   | Nucleus             | enzyme                     |
|          |                                                                                           |             |          | Plasma              | G-protein coupled receptor |
| F2R      | coagulation factor II (thrombin) receptor                                                 | 1.57        | 0.0206   | Membrane            | G-protein coupled receptor |
|          |                                                                                           |             |          | Plasma              | G-protein coupled receptor |
| FZD1     | frizzled homolog 1 ( <i>Drosophila</i> )                                                  | 1.83        | 0.0443   | Membrane            | G-protein coupled receptor |
|          |                                                                                           |             |          | Plasma              | G-protein coupled receptor |
| FZD5     | frizzled homolog 5 ( <i>Drosophila</i> )                                                  | 2.04        | 0.0269   | Membrane            | receptor                   |
|          |                                                                                           |             |          | Extracellular Space | growth factor              |
| JAG1     | jagged 1 (Alagille syndrome)                                                              | 1.93        | 0.0090   |                     |                            |
|          | potassium intermediate/small conductance calcium-activated channel, subfamily N, member 2 |             |          | Plasma              | ion channel                |
| KCNN2    | member 2                                                                                  | 2.27        | 0.0271   | Membrane            | ion channel                |
| BBS10    | Bardet-Biedl syndrome 10                                                                  | 2.7         | 0.0282   | Unknown             | other                      |
| C10RF107 | chromosome 1 open reading frame 107                                                       | 1.75        | 0.0351   | Nucleus             | other                      |
| C10RF116 | chromosome 1 open reading frame 116                                                       | 3.11        | 0.0359   | Unknown             | other                      |
| CCNE2    | cyclin E2                                                                                 | 1.96        | 0.0284   | Nucleus             | other                      |
|          | growth arrest and DNA-damage-inducible, gamma                                             |             |          | Nucleus             | other                      |
| GADD45G  | gamma                                                                                     | 11.03       | 0.0105   | Nucleus             | other                      |
| HSPC159  | galectin-related protein                                                                  | 1.67        | 0.0207   | Unknown             | other                      |
|          | membrane bound O-acyltransferase domain containing 2                                      |             |          | Unknown             | other                      |
| MBOAT2   | containing 2                                                                              | 1.77        | 0.0413   | Unknown             | other                      |
| MRFAP1L1 | Morf4 family associated protein 1-like 1                                                  | 1.45        | 0.0524   | Unknown             | other                      |
|          | nuclear fragile X mental retardation protein interacting protein 1                        |             |          | Nucleus             | other                      |
| NUFIP1   | interacting protein 1                                                                     | 1.91        | 0.0529   | Nucleus             | other                      |
|          | origin recognition complex, subunit 5-like (yeast)                                        |             |          | Nucleus             | other                      |
| ORC5L    | (yeast)                                                                                   | 1.67        | 0.0456   | Nucleus             | other                      |
| PER1     | period homolog 1 ( <i>Drosophila</i> )                                                    | 2.49        | 0.0135   | Nucleus             | other                      |
| PHF20L1  | PHD finger protein 20-like 1                                                              | 1.53        | 0.0424   | Unknown             | other                      |
| SOCS2    | suppressor of cytokine signaling 2                                                        | 6           | 0.0089   | Cytoplasm           | other                      |
| SPHAR    | S-phase response (cyclin-related)                                                         | 2.21        | 0.0117   | Unknown             | other                      |
| TIPARP   | TCDD-inducible poly(ADP-ribose) polymerase                                                | 3.28        | 0.0118   | Unknown             | other                      |
| TNFAIP8  | tumor necrosis factor, alpha-induced protein 8                                            | 2.38        | 0.0479   | Cytoplasm           | other                      |
| ZNF22    | zinc finger protein 22 (KOX 15)                                                           | 1.64        | 0.0201   | Nucleus             | other                      |
| ACTG2    | actin, gamma 2, smooth muscle, enteric                                                    | -1.49       | 0.026604 | Cytoplasm           | other                      |
|          |                                                                                           |             |          | Plasma              |                            |
| CLEC2B   | C-type lectin domain family 2, member B                                                   | -1.47       | 0.050511 | Membrane            | other                      |
| GON4L    | gon-4-like                                                                                | -1.55       | 0.035377 | Unknown             | other                      |
| LMO4     | LIM domain only 4                                                                         | -1.47       | 0.038536 | Nucleus             | other                      |
| LOC4951  |                                                                                           |             |          |                     |                            |
| /// OCM  | oncomodulin 2                                                                             | -2.05       | 0.022975 | Unknown             | other                      |

|         |                                                                                                |       |          |                     |                                            |
|---------|------------------------------------------------------------------------------------------------|-------|----------|---------------------|--------------------------------------------|
| PHF7    | PHD finger protein 7<br>pleckstrin homology domain containing, family                          | -1.6  | 0.021672 | Nucleus             | other                                      |
| PLEKHM1 | M (with RUN domain) member 1                                                                   | -2.1  | 0.045489 | Cytoplasm           | other                                      |
| S100A7  | S100 calcium binding protein A7                                                                | -1.96 | 0.050181 | Cytoplasm<br>Plasma | other                                      |
| TREM1   | triggering receptor expressed on myeloid cells 1<br>mucosa associated lymphoid tissue lymphoma | -1.71 | 0.030421 | Membrane            | other                                      |
| MALT1   | translocation gene 1<br>ATPase, Na <sup>+</sup> /K <sup>+</sup> transporting, alpha 1          | 1.55  | 0.0289   | Cytoplasm<br>Plasma | peptidase                                  |
| ATP1A1  | polypeptide                                                                                    | 1.64  | 0.0513   | Membrane            | transporter                                |
| HECW1   | HECT, C2 and WW domain containing E3<br>ubiquitin protein ligase 1                             | -1.45 | 0.044667 | Cytoplasm<br>Plasma | enzyme<br>G-protein<br>coupled<br>receptor |
| HRH3    | histamine receptor H3                                                                          | -1.46 | 0.024069 | Membrane            | receptor                                   |
| BMP2    | bone morphogenetic protein 2                                                                   | -2.2  | 0.011801 | Extracellular       | growth factor                              |
| DKK1    | dickkopf homolog 1                                                                             | -2.49 | 0.013399 | Extracellular       | growth factor                              |
| HBEGF   | heparin-binding EGF-like growth factor                                                         | -1.97 | 0.017622 | Extracellular       | growth factor                              |
| CHKA    | choline kinase alpha                                                                           | 1.5   | 0.0265   | Cytoplasm           | kinase                                     |
| NDRG1   | N-myc downstream regulated 1                                                                   | 1.66  | 0.0103   | Nucleus             | kinase                                     |
| PDK4    | pyruvate dehydrogenase kinase, isozyme 4                                                       | 3.9   | 0.0220   | Cytoplasm           | kinase                                     |
| SGK1    | serum/glucocorticoid regulated kinase 1                                                        | 6.92  | 0.0051   | Cytoplasm<br>Plasma | kinase                                     |
| ACVR2B  | activin A receptor, type IIB                                                                   | -1.49 | 0.042086 | Membrane<br>Plasma  | kinase                                     |
| EPHB3   | EPH receptor B3                                                                                | -2.13 | 0.017336 | Membrane            | kinase                                     |
| PIK3R3  | phosphoinositide-3-kinase, regulatory subunit 3<br>(gamma)                                     | -1.67 | 0.030496 | Cytoplasm           | kinase<br>transcription                    |
| CEBPD   | CCAAT/enhancer binding protein (C/EBP), delta                                                  | 3.07  | 0.0279   | Nucleus             | regulator<br>transcription                 |
| FOXA1   | forkhead box A1                                                                                | 1.46  | 0.0444   | Nucleus             | regulator<br>transcription                 |
| HEY1    | hairly/enhancer-of-split related with YRPW<br>motif 1                                          | 2.04  | 0.0182   | Nucleus             | regulator<br>transcription                 |
| LBH     | limb bud and heart development homolog<br>(mouse)                                              | 1.51  | 0.0492   | Nucleus             | regulator<br>transcription                 |
| MAF     | v-maf musculoaponeurotic fibrosarcoma<br>oncogene homolog (avian)                              | 2.14  | 0.0249   | Nucleus             | regulator<br>transcription                 |
| NKX3-1  | NK3 homeobox 1                                                                                 | 1.91  | 0.0277   | Nucleus             | regulator<br>transcription                 |
| PIAS1   | protein inhibitor of activated STAT, 1                                                         | 1.55  | 0.0404   | Nucleus             | regulator<br>transcription                 |
| TSC22D1 | TSC22 domain family, member 1                                                                  | 1.8   | 0.0143   | Nucleus             | regulator<br>transcription                 |
| ZBTB16  | zinc finger and BTB domain containing 16                                                       | 4.63  | 0.0327   | Nucleus             | regulator<br>transcription                 |
| ELF3    | E74-like factor 3                                                                              | -2.15 | 0.01564  | Nucleus             | regulator<br>transcription                 |
| HES1    | hairly and enhancer of split 1                                                                 | -1.83 | 0.043713 | Nucleus             | regulator<br>transcription                 |
| ID2     | inhibitor of DNA binding 2, dominant negative<br>helix-loop-helix protein                      | -1.87 | 0.02263  | Nucleus             | regulator<br>transcription                 |
| ID3     | inhibitor of DNA binding 3, dominant negative<br>helix-loop-helix protein                      | -1.47 | 0.028394 | Nucleus             | regulator<br>transcription                 |
| ID4     | inhibitor of DNA binding 4, dominant negative<br>helix-loop-helix protein                      | -2.34 | 0.020332 | Nucleus             | regulator<br>transcription                 |
| JUNB    | jun B proto-oncogene                                                                           | -1.98 | 0.038572 | Nucleus             | transcription                              |



---

|         |                                         |       |          |                    |                                         |
|---------|-----------------------------------------|-------|----------|--------------------|-----------------------------------------|
| MSX2    | msh homeobox 2                          | -3.56 | 0.008277 | Nucleus            | regulator<br>transcription<br>regulator |
| PITX1   | paired-like homeodomain 1               | -1.56 | 0.029816 | Nucleus            | transcription<br>regulator              |
| TOB1    | transducer of ERBB2, 1                  | -1.6  | 0.024468 | Nucleus            | transcription<br>regulator              |
| ZFP36L2 | zinc finger protein 36, C3H type-like 2 | -1.86 | 0.010737 | Nucleus            | transcription<br>regulator              |
| CLDN4   | claudin 4                               | -1.75 | 0.024505 | Plasma<br>Membrane | transmembrane<br>receptor               |
| ---     |                                         | -2.32 | 0.030849 |                    |                                         |
| ---     |                                         | -1.71 | 0.040187 |                    |                                         |
| ---     |                                         | -1.61 | 0.045368 |                    |                                         |
| ---     |                                         | -1.61 | 0.035459 |                    |                                         |
| BAMBI   |                                         | -3.42 | 0.012109 |                    |                                         |

---

**Supplementary Table 3** Direct AR target genes by coupling analysis of gene expression profile and ChIP-on-chip in Rv1 cells

| Rv1                               |                                                        |            |                                  |                                  |                        |                            |                                        | R1                               |                                  |                        |                            |                                        |
|-----------------------------------|--------------------------------------------------------|------------|----------------------------------|----------------------------------|------------------------|----------------------------|----------------------------------------|----------------------------------|----------------------------------|------------------------|----------------------------|----------------------------------------|
| Closest gene                      | Gene annotation                                        | chromosome | start                            | end                              | distance_e_to_TSS      | distance_to_TES            | location                               | start                            | end                              | distance_e_to_TSS      | distance_to_TES            | location                               |
| <b>Transcriptional Regulation</b> |                                                        |            |                                  |                                  |                        |                            |                                        |                                  |                                  |                        |                            |                                        |
| <b>BTF3</b>                       | basic transcription factor 3                           | chr5       | 72829283                         | 72829611                         | -558                   | -7756                      | TSS_upstream                           |                                  |                                  |                        |                            |                                        |
| <b>CEBPD</b>                      | CCAAT/enhancer binding protein (C/EBP), delta          | chr8       | 48810874                         | 48811546                         | 2112                   | 818                        | TES_downstream                         | 48810874                         | 48811512                         | 2129                   | 835                        | TES_downstream                         |
| <b>NR2F2</b>                      | nuclear receptor subfamily 2, group F, member 2        | chr15      | 94670166                         | 94670345                         | -4694                  | -12789                     | TSS_upstream                           |                                  |                                  |                        |                            |                                        |
| <b>NR6A1</b>                      | nuclear receptor subfamily 6, group A, member 1        | chr9       | 126571126                        | 126571291                        | 2188                   | -246685                    | intron                                 |                                  |                                  |                        |                            |                                        |
| <b>POLDIP3</b>                    | polymerase (DNA-directed), delta interacting protein 3 | chr22      | 41341510<br>41346902             | 41341922<br>41347342             | -811<br>-6217          | -32045<br>-37451           | TSS_upstream<br>TSS_upstream           |                                  |                                  |                        |                            |                                        |
| <b>SSBP2</b>                      | single-stranded DNA binding protein 2                  | chr5       | 81086222<br>81087631             | 81087276<br>81088127             | -3922<br>-5052         | -335321<br>-336451         | TSS_upstream<br>TSS_upstream           | 81084102<br>81084870             | 81084428<br>81087848             | -1438<br>-3532         | -332837<br>-334931         | TSS_upstream<br>TSS_upstream           |
| <b>TLE3</b>                       | transducin-like enhancer of split 3                    | chr15      | 68173921<br>68177489<br>68179274 | 68174283<br>68177899<br>68179399 | 2109<br>-1483<br>-3125 | -44630<br>-48222<br>-49864 | intron<br>TSS_upstream<br>TSS_upstream | 68174070<br>68177412<br>68179168 | 68174212<br>68177899<br>68179525 | 2070<br>-1444<br>-3135 | -44669<br>-48183<br>-49874 | intron<br>TSS_upstream<br>TSS_upstream |
| <b>YEATS4</b>                     | YEATS domain containing 4                              | chr12      | 68040290                         | 68040575                         | 634                    | -30409                     | intron                                 |                                  |                                  |                        |                            |                                        |

|                   |                                                                       |       |                                                                                  |                                                                                  |                                                        |                                                          |                                                                                                    |                                              |                                              |                              |                                |                                                          |  |
|-------------------|-----------------------------------------------------------------------|-------|----------------------------------------------------------------------------------|----------------------------------------------------------------------------------|--------------------------------------------------------|----------------------------------------------------------|----------------------------------------------------------------------------------------------------|----------------------------------------------|----------------------------------------------|------------------------------|--------------------------------|----------------------------------------------------------|--|
| <b>ZBTB10</b>     | zinc finger and BTB domain containing 10                              | chr8  | 81560014<br>81626217                                                             | 81560388<br>81627334                                                             | -801<br>65773                                          | -35120<br>31454                                          | TSS_upstream<br>TES_downstream                                                                     |                                              |                                              |                              |                                |                                                          |  |
| <b>ZNF444</b>     | zinc finger protein 444                                               | chr19 | 61344893                                                                         | 61345356                                                                         | 757                                                    | -18948                                                   | 5'UTR                                                                                              |                                              |                                              |                              |                                |                                                          |  |
| <b>ZNF710</b>     | zinc finger protein 710                                               | chr15 | 88343227                                                                         | 88343474                                                                         | -2405                                                  | -81678                                                   | TSS_upstream                                                                                       |                                              |                                              |                              |                                |                                                          |  |
| <b>Cell Cycle</b> |                                                                       |       |                                                                                  |                                                                                  |                                                        |                                                          |                                                                                                    |                                              |                                              |                              |                                |                                                          |  |
| <b>CDC14A</b>     | CDC14 cell division cycle 14 homolog A                                | chr1  | 100593181                                                                        | 100593441                                                                        | 2677                                                   | -144290                                                  | intron                                                                                             |                                              |                                              |                              |                                |                                                          |  |
| <b>CDKN1B</b>     | cyclin-dependent kinase inhibitor 1B (p27, Kip1)                      | chr12 | 12758279<br>12758865<br>12760267<br>12762024<br>12765035<br>12765950<br>12769732 | 12758544<br>12759247<br>12760982<br>12764574<br>12765219<br>12767701<br>12770929 | -3164<br>-2519<br>-951<br>1724<br>3552<br>5250<br>8755 | -8157<br>-7512<br>-5944<br>-3269<br>-1441<br>257<br>3762 | TSS_upstream<br>TSS_upstream<br>TSS_upstream<br>3'UTR<br>3'UTR<br>TES_downstream<br>TES_downstream | 12760478<br>12762024<br>12767356<br>12769363 | 12760620<br>12762322<br>12767812<br>12769913 | -1026<br>598<br>6009<br>8063 | -6019<br>-4395<br>1016<br>3070 | TSS_upstream<br>exon<br>TES_downstream<br>TES_downstream |  |
| <b>PPP1CB</b>     | protein phosphatase 1, catalytic subunit, beta isoform                | chr2  | 28822967<br>28829333                                                             | 28823757<br>28829574                                                             | -4755<br>1324                                          | -55946<br>-49855                                         | TSS_upstream<br>intron                                                                             | 28822859<br>28829106                         | 28823670<br>28829914                         | -4853<br>1381                | -56044<br>-49798               | TSS_upstream<br>intron                                   |  |
| <b>PPP3CA</b>     | protein phosphatase 3 (formerly 2B), catalytic subunit, alpha isoform | chr4  | 102485656<br>102489257                                                           | 102485786<br>102490309                                                           | 1654<br>-2408                                          | -322112<br>-326174                                       | intron<br>TSS_upstream                                                                             |                                              |                                              |                              |                                |                                                          |  |
| <b>RB1CC1</b>     | RB1-                                                                  | chr8  | 53794702                                                                         | 53795411                                                                         | -5512                                                  | -97485                                                   | TSS_upstream                                                                                       |                                              |                                              |                              |                                |                                                          |  |

|                          |                                                       |       |                                  |                                  |                         |                         |                                                    |          |          |      |        |              |
|--------------------------|-------------------------------------------------------|-------|----------------------------------|----------------------------------|-------------------------|-------------------------|----------------------------------------------------|----------|----------|------|--------|--------------|
|                          | inducible coiled-coil 1                               |       |                                  |                                  |                         |                         |                                                    |          |          |      |        |              |
| <b>Metabolic Process</b> |                                                       |       |                                  |                                  |                         |                         |                                                    |          |          |      |        |              |
| <b>METTL7A</b>           | methyltransferase like 7A                             | chr12 | 49603391<br>49604479             | 49603847<br>49605762             | -1181<br>320            | -8946<br>-7445          | TSS_upstream<br>exon                               | 49604479 | 49605762 | 320  | -7445  | exon         |
| <b>NAT1</b>              | N-acetyltransferase 1 (arylamine N-acetyltransferase) | chr8  | 18110919<br>18112903             | 18111701<br>18113032             | -584<br>1073            | -13788<br>-12131        | TSS_upstream<br>5'UTR                              | 18110919 | 18111665 | -602 | -13806 | TSS_upstream |
| <b>PLA2G6</b>            | phospholipase A2, group VI                            | chr22 | 36905769<br>36906395             | 36906048<br>36906609             | 1798<br>1204            | -68460<br>-69054        | 5'UTR<br>5'UTR                                     |          |          |      |        |              |
| <b>Apoptosis</b>         |                                                       |       |                                  |                                  |                         |                         |                                                    |          |          |      |        |              |
| <b>MCL1</b>              | myeloid cell leukemia sequence 1 (BCL2-related)       | chr1  | 148816234<br>148817093           | 148816449<br>148817381           | 1522<br>2418            | -3577<br>-2681          | intron<br>3'UTR                                    |          |          |      |        |              |
| <b>PMAIP1</b>            | phorbol-12-myristate-13-acetate-induced protein 1     | chr18 | 55781534<br>55783811<br>55789717 | 55781886<br>55784198<br>55790039 | 63494<br>65788<br>71662 | 59194<br>61488<br>67362 | TES_downstream<br>TES_downstream<br>TES_downstream |          |          |      |        |              |
| <b>Ion Transport</b>     |                                                       |       |                                  |                                  |                         |                         |                                                    |          |          |      |        |              |
| <b>CHRNA2</b>            | cholinergic receptor, nicotinic, alpha 2 (neuronal)   | chr8  | 27390315                         | 27393415                         | 809                     | -17683                  | 5'UTR                                              | 27391084 | 27393378 | 443  | -18049 | 5'UTR        |
| <b>1A2</b>               | solute carrier family 11 (proton-coupled divalent     | chr12 | 49704740                         | 49705712                         | 1182                    | -39183                  | 5'UTR                                              | 49704816 | 49705098 | 1451 | -38914 | 5'UTR        |

|                                                  |                                                          |       |                        |                        |                |                  |                              |                                  |                                  |                         |                            |                            |  |
|--------------------------------------------------|----------------------------------------------------------|-------|------------------------|------------------------|----------------|------------------|------------------------------|----------------------------------|----------------------------------|-------------------------|----------------------------|----------------------------|--|
|                                                  | metal ion transporters), member 2                        |       |                        |                        |                |                  |                              |                                  |                                  |                         |                            |                            |  |
| <b>Small GTPase Mediated Signal Transduction</b> |                                                          |       |                        |                        |                |                  |                              |                                  |                                  |                         |                            |                            |  |
| <b>LOC150786</b>                                 | RAB6C-like                                               | chr2  | 131835345              | 131836168              | 2444           | -1221            | 3'UTR                        |                                  |                                  |                         |                            |                            |  |
| <b>RAB11B</b>                                    | RAB11B, member RAS oncogene family                       | chr19 | 8359105<br>8360200     | 8359247<br>8360381     | -2119<br>-1005 | -15302<br>-14188 | TSS_upstream<br>TSS_upstream |                                  |                                  |                         |                            |                            |  |
| <b>Transport</b>                                 |                                                          |       |                        |                        |                |                  |                              |                                  |                                  |                         |                            |                            |  |
| <b>G3BP2</b>                                     | GTPase activating protein (SH3 domain) binding protein 2 | chr4  | 76816497               | 76816804               | 691            | -29660           | 5'UTR                        | 76815748                         | 76816767                         | 1084                    | -29267                     | 5'UTR                      |  |
| <b>LAPTM4B</b>                                   | lysosomal protein transmembrane 4 beta                   | chr8  | 98859358               | 98859629               | 2509           | -74511           | intron                       |                                  |                                  |                         |                            |                            |  |
| <b>Translational Initiation</b>                  |                                                          |       |                        |                        |                |                  |                              |                                  |                                  |                         |                            |                            |  |
| <b>DENR</b>                                      | density-regulated protein                                | chr12 | 121799802              | 121800199              | -3323          | -21904           | TSS_upstream                 |                                  |                                  |                         |                            |                            |  |
| <b>EIF4E</b>                                     | eukaryotic translation initiation factor 4E              | chr4  | 100048660<br>100073606 | 100049607<br>100073867 | 21005<br>-3598 | -28898<br>-53501 | intron<br>TSS_upstream       | 100048843                        | 100049571                        | 20931                   | -28972                     | intron                     |  |
| <b>Cytokinesis</b>                               |                                                          |       |                        |                        |                |                  |                              |                                  |                                  |                         |                            |                            |  |
| <b>AURKB</b>                                     | aurora kinase B                                          | chr17 | 8055406                | 8055578                | -885           | -6718            | TSS_upstream                 |                                  |                                  |                         |                            |                            |  |
| <b>Actin Cytoskeleton Organization</b>           |                                                          |       |                        |                        |                |                  |                              |                                  |                                  |                         |                            |                            |  |
| <b>CAPZB</b>                                     | capping protein (actin filament) muscle Z-line, beta     | chr1  | 19619827               | 19620733               | 64298          | -82421           | intron                       | 19619827<br>19623835<br>19625964 | 19620434<br>19625401<br>19626286 | 64448<br>59960<br>58453 | -82271<br>-86759<br>-88266 | intron<br>intron<br>intron |  |

| Kinase Activity                         |                                                                                |       |                        |                        |                |                 |                                    |           |           |         |         |                  |
|-----------------------------------------|--------------------------------------------------------------------------------|-------|------------------------|------------------------|----------------|-----------------|------------------------------------|-----------|-----------|---------|---------|------------------|
| <b>CAMKK2</b>                           | calcium/calm<br>odulin-<br>dependent<br>protein<br>kinase<br>kinase 2,<br>beta | chr12 | 120124968<br>120222395 | 120125607<br>120222773 | 93600<br>-2091 | 34592<br>-62705 | TES_downstre<br>am<br>TSS_upstream | 120222395 | 120222738 | -2073   | -62687  | TSS_up<br>stream |
| Cell-Cell Adhesion                      |                                                                                |       |                        |                        |                |                 |                                    |           |           |         |         |                  |
| <b>CLDN4</b>                            | claudin 4                                                                      | chr7  | 72879660               | 72880083               | -3257          | -5078           | TSS_upstream                       | 72795422  | 72796055  | -87390  | -89211  | TSS_up<br>stream |
| Nuclear Translocation                   |                                                                                |       |                        |                        |                |                 |                                    |           |           |         |         |                  |
| <b>CEP57</b>                            | centrosomal<br>protein<br>57kDa                                                | chr11 | 95168576               | 95168799               | 5398           | -36814          | intron                             |           |           |         |         |                  |
| DNA Repair                              |                                                                                |       |                        |                        |                |                 |                                    |           |           |         |         |                  |
| <b>USP1</b>                             | ubiquitin<br>specific<br>peptidase 1                                           | chr1  | 62676337               | 62676553               | 1475           | -13615          | 5'UTR                              |           |           |         |         |                  |
| Lipopolysaccharide Biosynthetic Process |                                                                                |       |                        |                        |                |                 |                                    |           |           |         |         |                  |
| <b>CMAS</b>                             | cytidine<br>monophosph<br>ate N-<br>acetylneura<br>minic acid<br>synthetase    | chr12 | 22088113               | 22088748               | -1995          | -21437          | TSS_upstream                       |           |           |         |         |                  |
| Collagen Fibril Organization            |                                                                                |       |                        |                        |                |                 |                                    |           |           |         |         |                  |
| <b>COL5A2</b>                           | collagen,<br>type V, alpha<br>2                                                | chr2  | 189632866              | 189633366              | 119733         | -28230          | intron                             | 189632866 | 189633366 | 119733  | -28230  | intron           |
| Cholesterol Biosynthetic Process        |                                                                                |       |                        |                        |                |                 |                                    |           |           |         |         |                  |
| <b>DHCR24</b>                           | 24-<br>dehydrochol<br>esterol<br>reductase                                     | chr1  | 55126716               | 55126901               | -1300          | -38921          | TSS_upstream                       |           |           |         |         |                  |
| Proteolysis                             |                                                                                |       |                        |                        |                |                 |                                    |           |           |         |         |                  |
| <b>FOLH1</b>                            | folate<br>hydrolase<br>(prostate-<br>specific<br>membrane                      | chr11 | 49412231               | 49412567               | -225602        | -287636         | TSS_upstream                       | 49412277  | 49412531  | -225607 | -287641 | TSS_up<br>stream |

|                                                                        |                                                             |       |                                              |                                              |                                 |                                          |                                                              |                      |                      |               |                    |                              |  |
|------------------------------------------------------------------------|-------------------------------------------------------------|-------|----------------------------------------------|----------------------------------------------|---------------------------------|------------------------------------------|--------------------------------------------------------------|----------------------|----------------------|---------------|--------------------|------------------------------|--|
|                                                                        | antigen) 1                                                  |       |                                              |                                              |                                 |                                          |                                                              |                      |                      |               |                    |                              |  |
| <b>Microtubule Cytoskeleton Organization</b>                           |                                                             |       |                                              |                                              |                                 |                                          |                                                              |                      |                      |               |                    |                              |  |
| <b>MAP7</b>                                                            | microtubule-associated protein 7                            | chr6  | 136913993<br>136915641                       | 136915278<br>136915786                       | -1151<br>-2229                  | -209070<br>-210148                       | TSS_upstream<br>TSS_upstream                                 | 136914220            | 136915412            | -1332         | -209251            | TSS_upstream                 |  |
| <b>S-adenosylmethionine Biosynthetic Process</b>                       |                                                             |       |                                              |                                              |                                 |                                          |                                                              |                      |                      |               |                    |                              |  |
| <b>MAT2A</b>                                                           | methionine adenosyltransferase II, alpha                    | chr2  | 85618173                                     | 85618757                                     | -1333                           | -7446                                    | TSS_upstream                                                 |                      |                      |               |                    |                              |  |
| <b>Visual Perception, Response to Stimulus</b>                         |                                                             |       |                                              |                                              |                                 |                                          |                                                              |                      |                      |               |                    |                              |  |
| <b>RPGRI1</b>                                                          | retinitis pigmentosa GTPase regulator interacting protein 1 | chr14 | 20857801                                     | 20858272                                     | 32061                           | -31261                                   | exon                                                         |                      |                      |               |                    |                              |  |
| <b>Fatty Acid Biosynthetic Process</b>                                 |                                                             |       |                                              |                                              |                                 |                                          |                                                              |                      |                      |               |                    |                              |  |
| <b>SCD</b>                                                             | stearoyl-CoA desaturase (delta-9-desaturase)                | chr10 | 102120550                                    | 102121010                                    | 24019                           | 6204                                     | TES_downstream                                               |                      |                      |               |                    |                              |  |
| <b>Transmembran Receptor Protein Tyrosine Kinase Signaling Pathway</b> |                                                             |       |                                              |                                              |                                 |                                          |                                                              |                      |                      |               |                    |                              |  |
| <b>SEMA3C</b>                                                          | sema domain, immunoglobulin domain (Ig)                     | chr7  | 80387118<br>80388257<br>80389522<br>80391365 | 80387383<br>80388983<br>80389775<br>80391798 | -648<br>-2018<br>-3046<br>-4979 | -177460<br>-178830<br>-179858<br>-181791 | TSS_upstream<br>TSS_upstream<br>TSS_upstream<br>TSS_upstream | 80387118<br>80388325 | 80387383<br>80389019 | -648<br>-2070 | -177460<br>-178882 | TSS_upstream<br>TSS_upstream |  |
| <b>Regulation of Chromatin Assembly or Disassembly</b>                 |                                                             |       |                                              |                                              |                                 |                                          |                                                              |                      |                      |               |                    |                              |  |
| <b>TLK1</b>                                                            | tousled-like kinase 1                                       | chr2  | 171732348                                    | 171732786                                    | -7362                           | -175752                                  | TSS_upstream                                                 |                      |                      |               |                    |                              |  |
| <b>Regulation of ARF GTPase Activity</b>                               |                                                             |       |                                              |                                              |                                 |                                          |                                                              |                      |                      |               |                    |                              |  |
| <b>CENTB2</b>                                                          | ArfGAP with coiled-coil, ankyrin repeat and PH domains      | chr3  | 196476225                                    | 196477723                                    | 168066                          | -207                                     | 3'UTR                                                        |                      |                      |               |                    |                              |  |

|                 | 2                                                                           |      |           |           |        |        |              |          |          |        |        |              |
|-----------------|-----------------------------------------------------------------------------|------|-----------|-----------|--------|--------|--------------|----------|----------|--------|--------|--------------|
| Unknown         |                                                                             |      |           |           |        |        |              |          |          |        |        |              |
| <b>ANP32E</b>   | acidic (leucine-rich) nuclear phosphoprotein 32 family, member E            | chr1 | 148473061 | 148473603 | 1751   | -15854 | intron       |          |          |        |        |              |
| <b>C6orf106</b> |                                                                             | chr6 | 34671460  | 34671749  | 100998 | -8555  | intron       | 34671392 | 34672010 | 100901 | -8652  | intron       |
| <b>KIAA0265</b> | kelch domain containing 10                                                  | chr7 | 129497062 | 129497337 | -385   | -63629 | TSS_upstream |          |          |        |        |              |
| <b>MTDH</b>     | metadherin                                                                  | chr8 | 98727134  | 98727280  | 1625   | -80503 | intron       |          |          |        |        |              |
| <b>PLEKHF2</b>  | pleckstrin homology domain containing, family F (with FYVE domain) member 2 | chr8 | 96208607  | 96209050  | -6385  | -29258 | TSS_upstream | 96208867 | 96209050 | -6255  | -29128 | TSS_upstream |
| <b>SMA4</b>     | glucuronidase, beta pseudogene                                              | chr5 | 69010165  | 69010943  | 287    | -39509 | intron       |          |          |        |        |              |
|                 |                                                                             |      | 69011881  | 69014078  | 2157   | -2516  | 5'UTR        | 69013760 | 69013937 | -3007  | -42803 | TSS_upstream |
|                 |                                                                             |      | 69041207  | 69041566  | -30545 | -70341 | TSS_upstream | 69041207 | 69041566 | -30545 | -70341 | TSS_upstream |
|                 |                                                                             |      | 69042725  | 69043062  | -32052 | -71848 | TSS_upstream | 69042725 | 69043062 | -32052 | -71848 | TSS_upstream |
|                 |                                                                             |      | 69043534  | 69044102  | -32977 | -72773 | TSS_upstream | 69043534 | 69044533 | -33192 | -72988 | TSS_upstream |
| <b>WDR42A</b>   | WD repeat domain 42A                                                        | chr1 | 158497235 | 158498168 | 901    | -45573 | 5'UTR        |          |          |        |        |              |

Green: significantly down-regulated

red: significantly up-regulated

common binding in Rv1 and R1 and significantly changed in the expression array in both Rv1 and R1



Direct AR target genes by coupling analysis of gene expression profile and ChIP-on-chip in R1 cells

| R1                                |                                                   |            |           |           |                 |                 |                | Rv1      |          |                 |                 |                |
|-----------------------------------|---------------------------------------------------|------------|-----------|-----------|-----------------|-----------------|----------------|----------|----------|-----------------|-----------------|----------------|
| Closest gene                      | gene annotation                                   | chromosome | start     | end       | distance_to_TSS | distance_to_TES | location       | start    | end      | distance_to_TSS | distance_to_TES | location       |
| <b>Transcriptional regulation</b> |                                                   |            |           |           |                 |                 |                |          |          |                 |                 |                |
| <b>CEBPD</b>                      | CCAAT/enhancer binding protein (C/EBP), delta     | chr8       | 48810874  | 48811512  | 2129            | 835             | TES_downstream | 48810874 | 48811546 | 2112            | 818             | TES_downstream |
| <b>HES1</b>                       | hairy and enhancer of split 1                     | chr3       | 194752948 | 194755504 | -582401         | -584865         | TSS_upstream   |          |          |                 |                 |                |
| <b>HEY1</b>                       | hairy/enhancer-of-split related with YRPW motif 1 | chr8       | 81153124  | 81156474  | -312147         | -315999         | TSS_upstream   | 81153124 | 81153824 | -310822         | -314674         | TSS_upstream   |
|                                   |                                                   |            | 81156980  | 81157390  | -314533         | -318385         | TSS_upstream   | 81154226 | 81156273 | -312597         | -316449         | TSS_upstream   |
|                                   |                                                   |            | 81157654  | 81158003  | -315176         | -319028         | TSS_upstream   |          |          |                 |                 |                |
|                                   |                                                   |            | 81158544  | 81158889  | -316064         | -319916         | TSS_upstream   |          |          |                 |                 |                |
|                                   |                                                   |            | 81159480  | 81160276  | -317226         | -321078         | TSS_upstream   |          |          |                 |                 |                |
|                                   |                                                   |            | 81246929  | 81247568  | -404596         | -408448         | TSS_upstream   |          |          |                 |                 |                |
|                                   |                                                   |            | 81248268  | 81248624  | -405794         | -409646         | TSS_upstream   | 81248379 | 81248624 | -405849         | -409701         | TSS_upstream   |
| <b>ID2</b>                        | inhibitor of DNA binding 2                        | chr2       | 81372903  | 81373382  | -530490         | -534342         | TSS_upstream   | 81373158 | 81373382 | -530618         | -534470         | TSS_upstream   |
|                                   |                                                   |            | 8735091   | 8735500   | -4268           | -6736           | TSS_upstream   | 8734980  | 8735464  | -4341           | -6809           | TSS_upstream   |
|                                   |                                                   |            | 8735789   | 8736101   | -3618           | -6086           | TSS_upstream   |          |          |                 |                 |                |
|                                   |                                                   |            | 8737175   | 8737977   | -1987           | -4455           | TSS_upstream   | 8737401  | 8737872  | -1927           | -4395           | TSS_upstream   |
|                                   |                                                   |            | 8740610   | 8740986   | 1235            | -1233           | 3'UTR          | 8740201  | 8741285  | 1180            | -1288           | 3'UTR          |
| <b>MSX2</b>                       | msh homeobox 2                                    | chr5       | 9059142   | 9060487   | 320251          | 317783          | TES_downstream | 9059142  | 9060452  | 320234          | 317766          | TES_downstream |
|                                   |                                                   |            | 173243782 | 173244367 | -840106         | -846432         | TSS_upstream   |          |          |                 |                 |                |
| <b>NKX3-1</b>                     | NK3 homeobox 1                                    | chr8       | 23593953  | 23594537  | 2149            | -2073           | 3'UTR          | 23593953 | 23594645 | 2095            | -2127           | 3'UTR          |
|                                   |                                                   |            |           |           |                 |                 |                | 23595043 | 23595418 | 1164            | -3058           | intron         |
| <b>PER1</b>                       | period                                            | chr17      | 7964234   | 7964559   | 32030           | 20118           | TES_downstream | 7964198  | 7964522  | 32066           | 20154           | TES_downstream |

|                          |                                                                           |       |                                                          |                                                          |                                              |                                                |                                                                                      |                                  |                      |                        |                            |                                         |
|--------------------------|---------------------------------------------------------------------------|-------|----------------------------------------------------------|----------------------------------------------------------|----------------------------------------------|------------------------------------------------|--------------------------------------------------------------------------------------|----------------------------------|----------------------|------------------------|----------------------------|-----------------------------------------|
|                          | homolog 1                                                                 |       |                                                          |                                                          |                                              |                                                | nstream                                                                              |                                  |                      |                        |                            | wnstream                                |
|                          |                                                                           |       | 7996673                                                  | 7997182                                                  | -501                                         | -12413                                         | TSS_upstream                                                                         |                                  |                      |                        |                            | TSS_upstream                            |
|                          |                                                                           |       | 7997443                                                  | 7998109                                                  | -1350                                        | -13262                                         | TSS_upstream                                                                         | 7997509                          | 7998169              | -1413                  | -13325                     | TSS_upstream                            |
|                          |                                                                           |       | 7998810                                                  | 7999799                                                  | -2878                                        | -14790                                         | TSS_upstream                                                                         | 7998599                          | 7999944              | -2845                  | -14757                     | TSS_upstream                            |
| PIAS1                    | protein inhibitor of activated STAT, 1                                    | chr15 | 65601473                                                 | 65601685                                                 | -532046                                      | -665876                                        | TSS_upstream                                                                         | 65601507                         | 65601949             | -531897                | -665727                    | TSS_upstream                            |
| ZNF22                    | zinc finger protein 22                                                    | chr10 | 44817001                                                 | 44818205                                                 | 1676                                         | -3175                                          | 5'UTR                                                                                | 44817032                         | 44817866             | 1522                   | -3329                      | 5'UTR                                   |
| <b>Metabolic process</b> |                                                                           |       |                                                          |                                                          |                                              |                                                |                                                                                      |                                  |                      |                        |                            |                                         |
| ATP1A1                   | ATPase, Na <sup>+</sup> /K <sup>+</sup> transporting, alpha 1 polypeptide | chr1  | 116718550<br>116719418                                   | 116718930<br>116719823                                   | 1382<br>2262                                 | -30176<br>-29296                               | intron<br>intron                                                                     |                                  |                      |                        |                            |                                         |
| NAT1                     | N-acetyltransferase 1 (arylamine N-acetyltransferase)                     | chr8  | 18110919<br>18287836<br>18619490<br>18913030<br>18914268 | 18111665<br>18288299<br>18619644<br>18913999<br>18914983 | -602<br>176173<br>507673<br>801620<br>802731 | -13806<br>162969<br>494469<br>788416<br>789527 | TSS_upstream<br>TES_downstream<br>TES_downstream<br>TES_downstream<br>TES_downstream | 18110919<br>18112903<br>18913030 | 18111701<br>18113032 | -584<br>1073<br>801480 | -13788<br>-12131<br>788276 | TSS_upstream<br>5'UTR<br>TES_downstream |
| ODC1                     | ornithine decarboxylase 1                                                 | chr2  | 10509469<br>10510574                                     | 10509731<br>10510788                                     | -3697<br>-4778                               | -11642<br>-12723                               | TSS_upstream<br>TSS_upstream                                                         |                                  |                      |                        |                            |                                         |
| PDK4                     | pyruvate dehydrogenase kinase, isozyme 4                                  | chr7  | 95064004<br>95065386<br>95066348                         | 95064989<br>95065609<br>95067006                         | -636<br>-1637<br>-2817                       | -13748<br>-14749<br>-15929                     | TSS_upstream<br>TSS_upstream<br>TSS_upstream                                         | 95064286                         | 95064688             | -627                   | -13739                     | TSS_upstream                            |

|                                             |                                               |       |          |          |         |         |                                                                              |          |          |          |          |                                                                                       |
|---------------------------------------------|-----------------------------------------------|-------|----------|----------|---------|---------|------------------------------------------------------------------------------|----------|----------|----------|----------|---------------------------------------------------------------------------------------|
|                                             |                                               |       | 95236812 | 95237135 | -173113 | -186225 | eam<br>TSS_upstr<br>eam<br>TSS_upstr<br>eam                                  | 95236812 | 95237407 | -173249  | -186361  | TSS_up<br>stream                                                                      |
|                                             |                                               |       | 95794769 | 95795094 | -731071 | -744183 |                                                                              |          |          |          |          |                                                                                       |
| <b>Cell-cell adhesion</b>                   |                                               |       |          |          |         |         |                                                                              |          |          |          |          |                                                                                       |
| <b>CLDN4</b>                                | claudin 4                                     | chr7  | 72795422 | 72796055 | -87390  | -89211  | TSS_upstr<br>eam<br>TES_dow<br>nstream                                       | 72879660 | 72880083 | -3257    | -5078    | TSS_up<br>stream                                                                      |
|                                             |                                               |       | 73075006 | 73075902 | 192326  | 190505  |                                                                              |          |          |          |          |                                                                                       |
| <b>Mitochondrial membrane organization</b>  |                                               |       |          |          |         |         |                                                                              |          |          |          |          |                                                                                       |
| <b>DNM1L</b>                                | dynamamin 1-like                              | chr12 | 32724068 | 32725482 | 1285    | -63034  | intron                                                                       | 32724068 | 32725451 | 1269     | -63049   | intron                                                                                |
| <b>Multicellular organismal development</b> |                                               |       |          |          |         |         |                                                                              |          |          |          |          |                                                                                       |
| <b>DKK1</b>                                 | dickkopf homolog 1                            | chr10 | 53130157 | 53130342 | -613797 | -617172 | TSS_upstr<br>eam                                                             | 52313813 | 52315451 | -1429414 | -1432789 | TSS_up<br>stream                                                                      |
| <b>Cell-cell signaling</b>                  |                                               |       |          |          |         |         |                                                                              |          |          |          |          |                                                                                       |
| <b>FZD1</b>                                 | frizzled homolog 1                            | chr7  | 90172702 | 90174838 | -557948 | -562296 | TSS_upstr<br>eam<br>TSS_upstr<br>eam                                         | 90172607 | 90174765 | -558032  | -562380  | TSS_up<br>stream<br>TSS_up<br>stream                                                  |
|                                             |                                               |       | 90730088 | 90731487 | -931    | -5279   |                                                                              | 90730125 | 90731390 | -961     | -5309    |                                                                                       |
| <b>Protein folding</b>                      |                                               |       |          |          |         |         |                                                                              |          |          |          |          |                                                                                       |
| <b>FKBP5</b>                                | FK506 binding protein 5                       | chr6  | 35801888 | 35803468 | -37987  | -153333 | TSS_upstr<br>eam<br>TSS_upstr<br>eam<br>TSS_upstr<br>eam<br>TSS_upstr<br>eam | 35762853 | 35763773 | 1378     | -113968  | 5'UTR<br>TSS_up<br>stream<br>TSS_up<br>stream<br>TSS_up<br>stream<br>TSS_up<br>stream |
|                                             |                                               |       | 35804112 | 35804602 | -39666  | -155012 |                                                                              | 35801888 | 35803408 | -37957   | -153303  |                                                                                       |
|                                             |                                               |       | 35804898 | 35805771 | -40643  | -155989 |                                                                              | 35805243 | 35805510 | -40685   | -156031  |                                                                                       |
|                                             |                                               |       | 35807932 | 35808621 | -43585  | -158931 |                                                                              | 35808293 | 35808621 | -43766   | -159112  |                                                                                       |
|                                             |                                               |       | 35809573 | 35809895 | -45043  | -160389 |                                                                              | 35809573 | 35809895 | -45043   | -160389  |                                                                                       |
| <b>DNA repair, regulation of cell cycle</b> |                                               |       |          |          |         |         |                                                                              |          |          |          |          |                                                                                       |
| <b>GADD4<br/>5G</b>                         | growth arrest and DNA-damage-inducible, gamma | chr9  | 91245556 | 91245815 | -164062 | -165601 | TSS_upstr<br>eam                                                             |          |          |          |          |                                                                                       |
| <b>Signal transduction</b>                  |                                               |       |          |          |         |         |                                                                              |          |          |          |          |                                                                                       |
| <b>HRH3</b>                                 | histamine receptor H3                         | chr20 | 60246354 | 60246635 | -17788  | -23073  | TSS_upstr<br>eam                                                             |          |          |          |          |                                                                                       |
| <b>Proteolysis</b>                          |                                               |       |          |          |         |         |                                                                              |          |          |          |          |                                                                                       |
| <b>MALT1</b>                                | mucosa                                        | chr18 | 54487870 | 54488635 | -1345   | -80097  | TSS_upstr                                                                    | 54488870 | 54489100 | -612     | -79364   | TSS_up                                                                                |

|                                            |                                                          |      |           |           |         |         |                |           |           |         |         |                |
|--------------------------------------------|----------------------------------------------------------|------|-----------|-----------|---------|---------|----------------|-----------|-----------|---------|---------|----------------|
|                                            | associated lymphoid tissue lymphoma translocation gene 1 |      |           |           |         |         | eam            |           |           |         |         | stream         |
| <b>Response to metal ion</b>               |                                                          |      |           |           |         |         |                |           |           |         |         |                |
| <b>NDRG1</b>                               | N-myc downstream regulated 1                             | chr8 | 134401832 | 134402376 | -23425  | -83509  | TSS_upstream   |           |           |         |         |                |
|                                            |                                                          |      | 134403184 | 134404468 | -25147  | -85231  | TSS_upstream   | 134403738 | 134404468 | -25424  | -85508  | TSS_upstream   |
|                                            |                                                          |      | 134407388 | 134408683 | -29356  | -89440  | TSS_upstream   | 134407780 | 134408683 | -29552  | -89636  | TSS_upstream   |
|                                            |                                                          |      | 134409159 | 134409765 | -30783  | -90867  | TSS_upstream   |           |           |         |         |                |
| <b>tRNA catabolic process</b>              |                                                          |      |           |           |         |         |                |           |           |         |         |                |
| <b>POP1</b>                                | processing of precursor 1, ribonuclease P/MRP subunit    | chr8 | 99199178  | 99199711  | 201     | -40368  | 5'UTR          | 99199178  | 99199676  | 184     | -40385  | 5'UTR          |
|                                            |                                                          | chr8 | 99378899  | 99379519  | 179966  | 139397  | TES_downstream |           |           |         |         |                |
| <b>DNA replication</b>                     |                                                          |      |           |           |         |         |                |           |           |         |         |                |
| <b>SPHAR</b>                               | S-phase response (cyclin-related)                        | chr1 | 226930302 | 226930964 | -576270 | -577237 | TSS_upstream   | 226929901 | 226930999 | -576453 | -577420 | TSS_upstream   |
|                                            |                                                          | chr1 | 227474815 | 227475761 | -31615  | -32582  | TSS_upstream   | 227474815 | 227475802 | -31595  | -32562  | TSS_upstream   |
|                                            |                                                          | chr1 | 227476136 | 227476381 | -30645  | -31612  | TSS_upstream   | 227476136 | 227476381 | -30645  | -31612  | TSS_upstream   |
|                                            |                                                          | chr1 | 227476737 | 227476988 | -30041  | -31008  | TSS_upstream   | 227476737 | 227477204 | -29933  | -30900  | TSS_upstream   |
| <b>Protein amino acid ADP-ribosylation</b> |                                                          |      |           |           |         |         |                |           |           |         |         |                |
| <b>TIPARP</b>                              | TCDD-inducible poly(ADP-ribose) polymerase               | chr3 | 157874243 | 157874772 | -565    | -32715  | TSS_upstream   | 157876804 | 157877112 | 1886    | -30264  | 5'UTR          |
|                                            |                                                          | chr3 | 158017653 | 158018473 | 142991  | 110841  | TES_downstream | 158017653 | 158018331 | 142920  | 110770  | TES_downstream |
| <b>Apoptosis</b>                           |                                                          |      |           |           |         |         |                |           |           |         |         |                |

|          |                                                                                  |      |           |           |          |          |                |           |           |          |              |                |
|----------|----------------------------------------------------------------------------------|------|-----------|-----------|----------|----------|----------------|-----------|-----------|----------|--------------|----------------|
| TNFAIP8  | tumor necrosis factor, alpha-induced protein 8                                   | chr5 | 115938808 | 115939295 | -2693265 | -2819140 | TSS_upstream   | 115938763 | 115939295 | -2693287 | -2819162     | TSS_upstream   |
|          |                                                                                  | chr5 | 118633912 | 118634812 | 2046     | -123829  | intron         | 118634154 | 118634812 | 2167     | -123708      | intron         |
|          |                                                                                  | chr5 | 118816698 | 118816979 | 184522   | 58647    | TES_downstream | 118816626 | 118816979 | 184486   | 58611        | TES_downstream |
| Unknown  |                                                                                  |      |           |           |          |          |                |           |           |          |              |                |
| C1orf107 |                                                                                  | chr1 | 208025278 | 208026194 | -42219   | -71794   | TSS_upstream   | 208025133 | 208026232 | -42273   | -71848       | TSS_upstream   |
| C1orf116 |                                                                                  | chr1 | 205270288 | 205272441 | 1350     | -12873   | 5'UTR          | 205270288 | 205272381 | 1380     | -12843       | 5'UTR          |
|          |                                                                                  |      |           |           |          |          | 205272983      | 205273374 | -464      | -14687   | TSS_upstream |                |
|          |                                                                                  |      |           |           |          |          | 205278225      | 205278413 | -5605     | -19828   | TSS_upstream |                |
| HSPC159  | galectin-related protein                                                         | chr2 | 64186543  | 64186779  | -348504  | -352634  | TSS_upstream   | 64062483  | 64062705  | -472571  | -476701      | TSS_upstream   |
|          |                                                                                  | chr2 | 64528363  | 64529986  | -5991    | -10121   | TSS_upstream   | 64597496  | 64597828  | 62497    | 58367        | TES_downstream |
| MBOAT2   | membrane bound O-acyltransferase domain containing 2 elevated in prostate cancer | chr2 | 8735091   | 8735500   | 326031   | 178856   | TES_downstream | 8734980   | 8735464   | 326104   | 178929       | TES_downstream |
|          |                                                                                  | chr2 | 8735789   | 8736101   | 325381   | 178206   | TES_downstream |           |           |          |              |                |
|          |                                                                                  | chr2 | 8737175   | 8737977   | 323750   | 176575   | TES_downstream | 8737401   | 8737872   | 323690   | 176515       | TES_downstream |
|          |                                                                                  | chr2 | 8740610   | 8740986   | 320528   | 173353   | TES_downstream | 8740201   | 8741285   | 320583   | 173408       | TES_downstream |
|          |                                                                                  | chr2 | 9059142   | 9060487   | 1512     | -145663  | intron         | 9059142   | 9060452   | 1529     | -145646      | intron         |
| MRFAP1L1 | Morf4 family associated protein 1-like 1                                         | chr4 | 6685829   | 6686388   | 76346    | 74227    | TES_downstream | 6685829   | 6686388   | 76346    | 74227        | TES_downstream |
|          |                                                                                  | chr4 | 6746019   | 6746297   | 16296    | 14177    | TES_downstream | 6748931   | 6749281   | 13348    | 11229        | TES_downstream |
| PHF20L1  | PHD finger protein 20-like 1                                                     | chr8 | 133568262 | 133569209 | -288050  | -325883  | TSS_upstream   | 133565088 | 133565307 | -291588  | -329421      | TSS_upstream   |

Red color: significantly up-regulated in response to DHT for 2h

Green color: significantly down-regulated in response to DHT for 2h

 significantly changed in both R1 and Rv1 cells in response to DHT for 2h
